# Supplementary material for: Protein-Structure Assisted Optimization of 4,5-Dihydroxypyrimidine-6-Carboxamide Inhibitors of Influenza Virus Endonuclease
Source: PubMed Central journal article supplement (PMC5719402; doi:10.1038/s41598-017-17419-6), 2017-12-07

## Supplementary Results

### Protein-Structure Assisted Optimization of 4,5-Dihydropyrimidine-6-Carboxamide Inhibitors of Influenza Virus Endonuclease

Diane Beylkin,<sup>1,§</sup> Gyanendra Kumar,<sup>2,§</sup> Wei Zhou,<sup>1,§</sup> Jaehyeon Park,<sup>1</sup> Trushar Jeevan,<sup>3</sup> Chandraiah Lagiseti,<sup>1</sup> Rhodri Harfoot,<sup>3</sup> Richard J. Webby,<sup>3</sup> Stephen W. White,<sup>2</sup> and Thomas R. Webb<sup>1,\*</sup>

<sup>1</sup>Bioscience Division, SRI International, Menlo Park, CA 94025;

<sup>2</sup>Department of Structural Biology and <sup>3</sup>Department of Infectious Diseases, St. Jude Children's Research Hospital, Memphis, TN 38105

<sup>§</sup>These authors contributed equally to this work

**Supplementary Figure S1a. Crystal structures of selected carboxylate analogs in complex with the wild type PA<sub>N</sub> construct.**

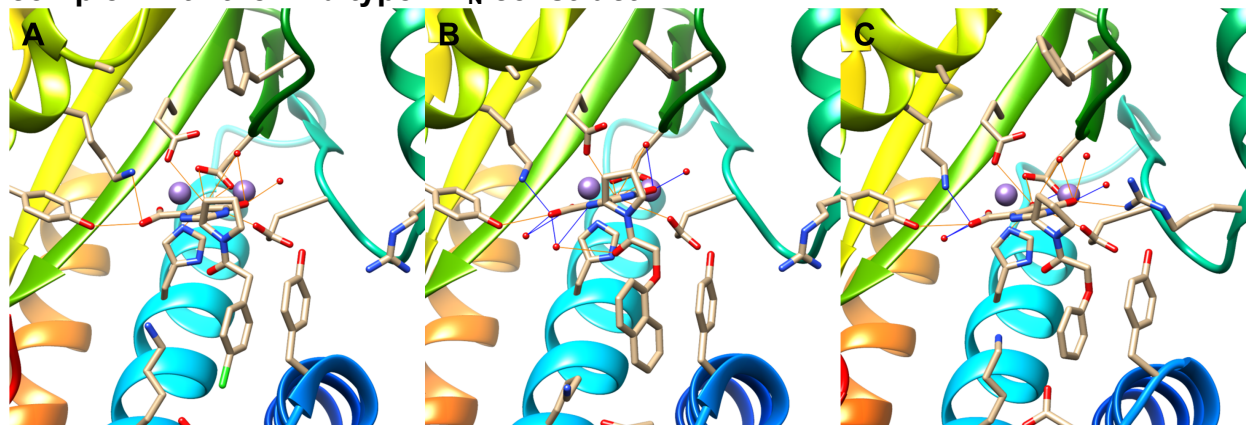

Carboxylate analogs A) **6a**, B) **6b**, and C) **6c** in complex with the wild type PA<sub>N</sub> construct. Blue lines show hydrogen-bond interactions and orange lines show interactions outside of standard distances.

**Supplementary Figure S1b. Electron density maps for the inhibitors shown in the main text Figure 2.**

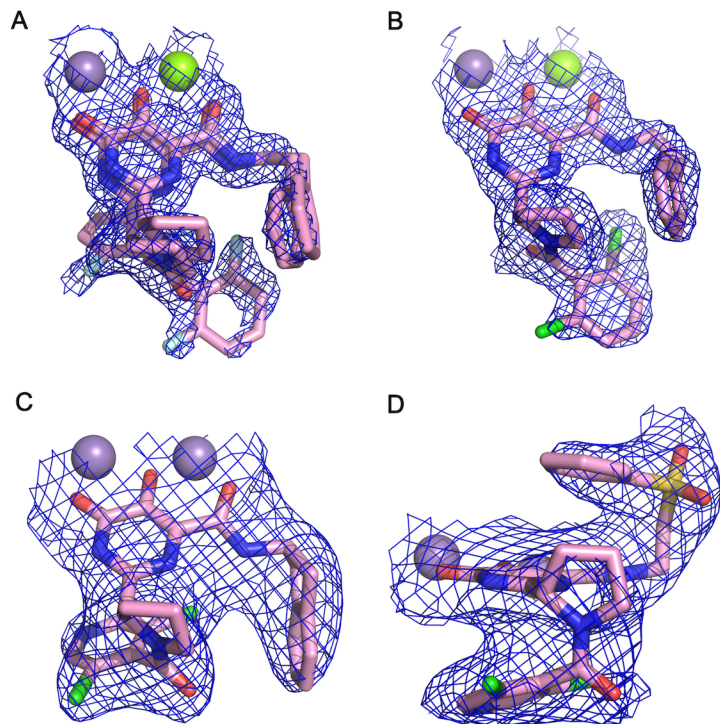

Electron density maps (2Fo-Fc) of the inhibitors bound at the active site of PAN. (A) Compound 7b at 0.8σ, (B) Compound 7a at 1σ, (C) Compound 8f at 1σ and (D) Compound 8e at 1σ. Mn<sup>2+</sup> ions are shown as violet balls and Mg<sup>2+</sup> as green balls, inhibitors are shown as sticks and electron density maps as blue mesh. In case of 7b, the compound adopts cis and trans conformations which explains the weak electron density for difluoro-benzene moiety.

**Supplementary Figure S1c: Electron density maps for the inhibitors shown in the main text Figure 3.**

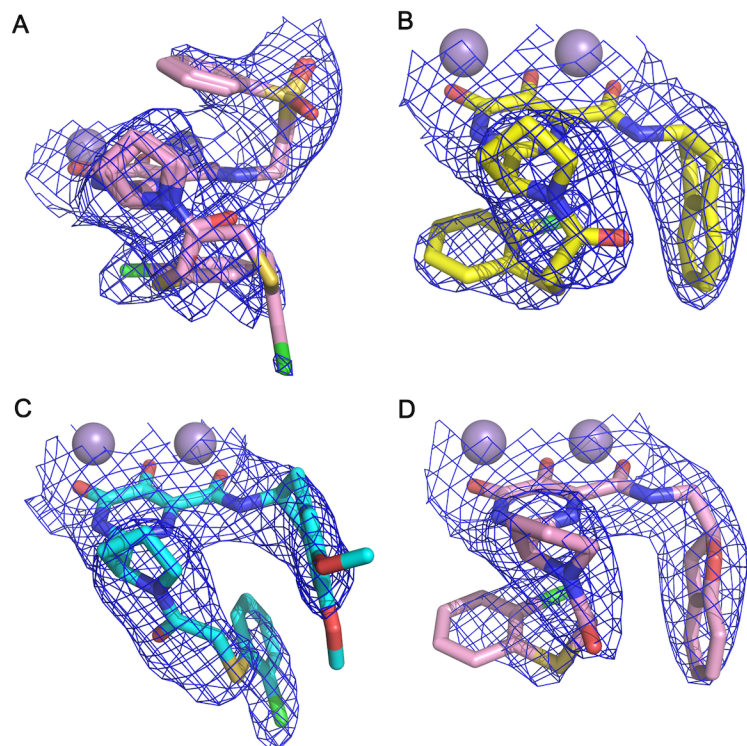

Electron density maps (2Fo-Fc) of the inhibitors bound at the active site of PAN. (A) Compound 10e at  $0.7\sigma$ , (B) Compound 10i at  $1\sigma$ , (C) Compound 10j at  $1\sigma$  and (D) Compound 10k at  $0.9\sigma$ . Mn<sup>2+</sup> ions are shown as violet balls, inhibitors are shown as sticks and electron density maps as blue mesh. In case of 10e, there are two alternative conformations.

**Supplementary Figure S1d: Electron density map for the inhibitor 10e shown in the main text Figure 4.**

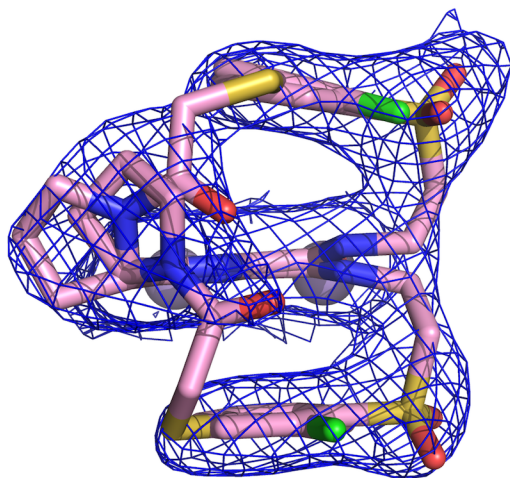

Electron density maps ( $2F_o - F_c$ ) of the inhibitor 10e bound at the active site of  $PA_N$ . Electron density is contoured at  $0.9\sigma$ .  $Mn^{2+}$  ions are shown as violet balls, inhibitors are shown as sticks and electron density maps as blue mesh. There are two alternative conformations of the bound inhibitor.



**Supplementary Figure S1e: Electron density map for the inhibitor 10e shown in the main text Figure 5.**

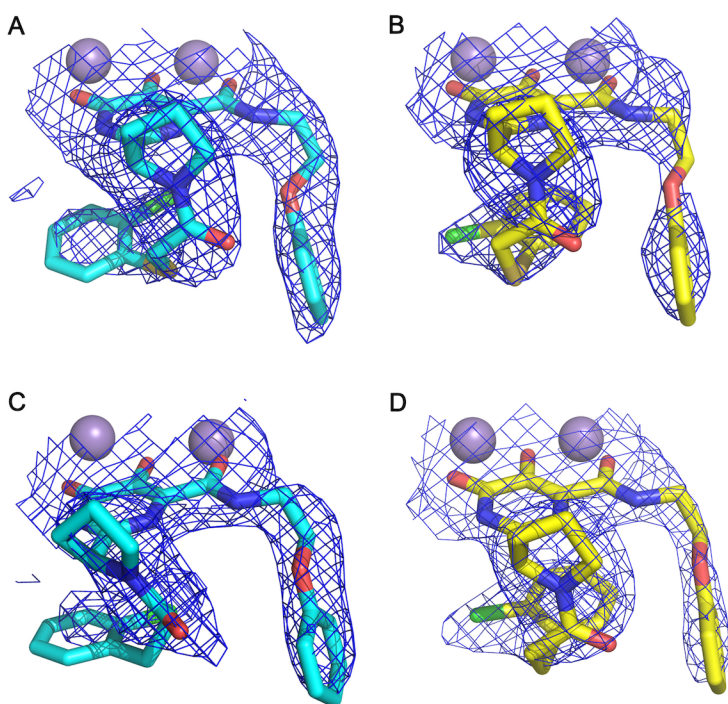

Electron density maps (2Fo-Fc) of the inhibitors bound at the active site of PAN. (A) Compound 9k with wt (B) Compound 9k with E119D, (C) Compound 9b with wt and (D) Compound 9b with E119D. Mn<sup>2+</sup> ions are shown as violet balls, inhibitors are shown as sticks and electron density maps as blue mesh contoured at 0.9σ.

## Supplementary Figure S2. Plaque Inhibition and Cytotoxicity Data.

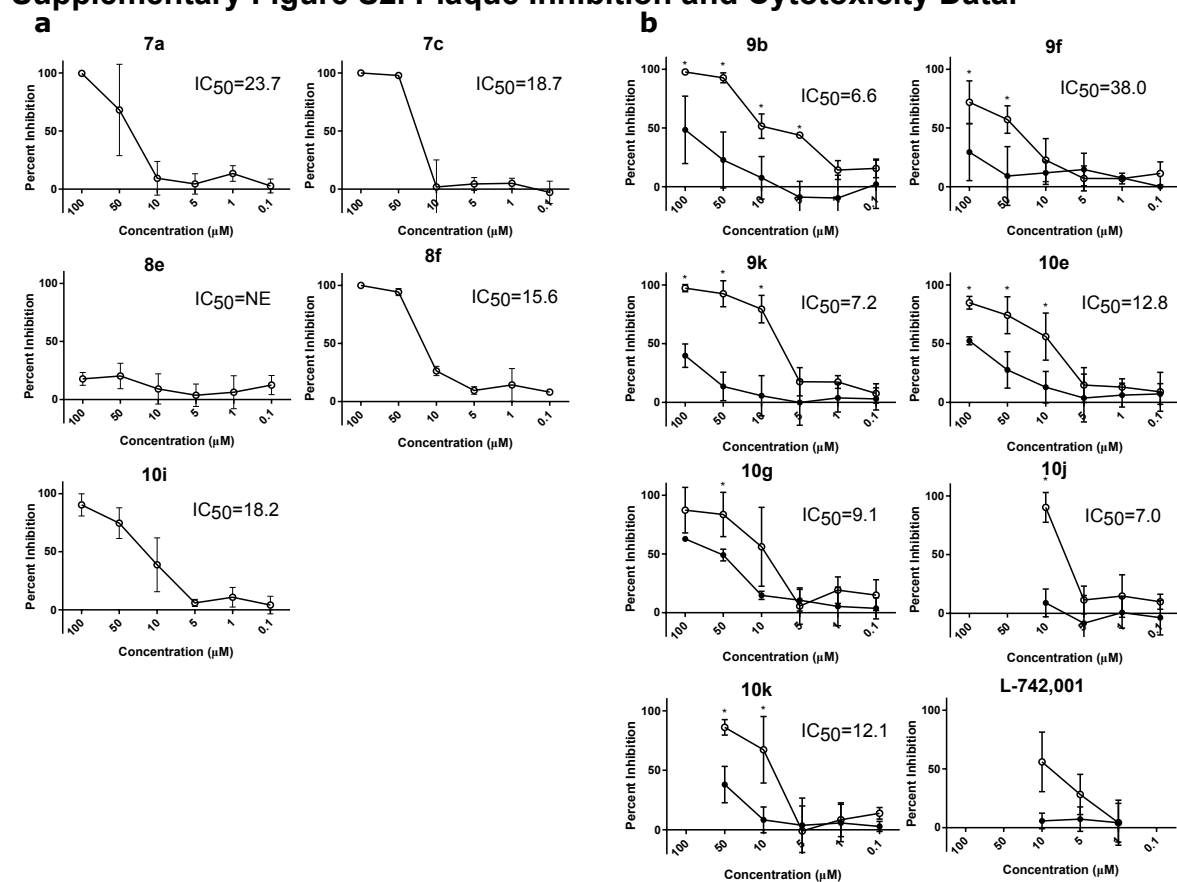

| Conc ( $\mu$ M) | 7a    | 7c    | 8e    | 8f    | 9b    | 9f    | 9k    | 10e   | 10g   | 10i   | 10j   | 10k   | L-742,001 |
|-----------------|-------|-------|-------|-------|-------|-------|-------|-------|-------|-------|-------|-------|-----------|
| 100             | 0.011 | 0.044 | 0.006 | 0.083 | 0.015 | 0.026 | 0.011 | 0.006 | 0.003 | 0.006 | 0.062 | 0.064 |           |
| 50              | 0.031 | 0.024 | 0.001 | 0.010 | 0.012 | 0.043 | 0.022 | 0.010 | 0.002 | 0.041 | 0.049 | 0.100 |           |
| 10              | 0.083 | 0.053 | 0.048 | 0.462 | 0.289 | 0.015 | 0.004 | 0.020 | 0.005 | 0.031 | 0.103 | 0.259 | 0.810     |
| 5               | 0.031 | 0.038 | 0.011 | 0.293 | 0.045 | 0.043 | 0.028 | 0.047 | 0.018 | 0.020 | 0.143 | 0.052 | 0.513     |
| 1               | 0.011 | 0.061 | 0.032 | 0.091 | 0.019 | 0.046 | 0.023 | 0.012 | 0.054 | 0.011 | 0.070 | 0.025 | 0.621     |
| 0.1             | 0.031 | 0.050 | 0.138 | 0.266 | 0.014 | 0.101 | 0.023 | 0.099 | 0.012 | 0.078 | 0.087 | 0.203 |           |

Plaque inhibition assays showing inhibition of virus growth with compounds representative of varying compound classes: A) Inhibition of wild-type virus with 7a, 7c, 8e, 8f and 10i. B) Inhibition of wild-type (open circles) cf. PA mutant E119D (circles) with 9b, 9f, 9k, 10e, 10g, 10j, 10k..  $IC_{50}$  values in micromoles per liter are indicated for the wild-type only; NE = no effect. (\*) indicate points where the wild-type and E119D mutant show statistically significant differences by two-way ANOVA ( $n = 4$ ,  $\alpha = 0.05$ ). Error bars represent mean  $\pm$  SD. C) Cytotoxicity assays showing p-value for the samples relative to untreated control by unpaired t-test with correction for multiple comparisons using the Holm-Sidak method ( $n = 3$ ,  $\alpha = 0.05$ ); (\*) indicates samples where there is a significant difference from untreated control.

Supplementary Figure S3. Structures of selected inhibitors in the wild type PA<sub>N</sub>.

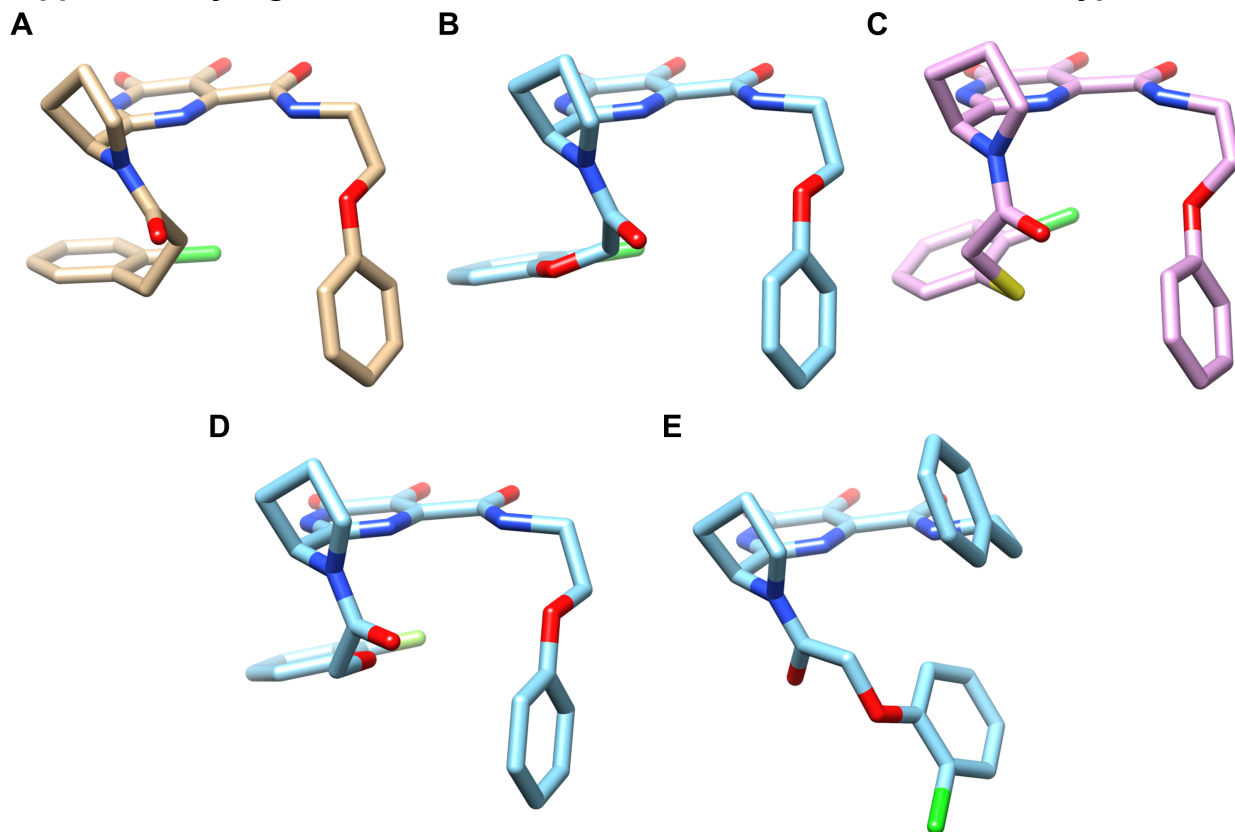

For compounds with  $X_2 = \text{Cl}$  and  $R_4 = \text{OPh}$ , such as A) **9b**, B) **9f**, or C) **9k** as well as compounds with  $X_2 = \text{F}$  and  $R_4 = \text{OPh}$ , such as D) **9h**, a similar cis conformation is adopted. In this conformation,  $R_1$  stacks underneath the warhead and the phenoxy group stacks with Tyr24. For compounds with  $R_4 = \text{Ph}$ , such as E) **9f**, a trans conformation is adopted and both the  $R_1$  and  $R_4$  phenyl groups stack with Tyr24.

**Supplementary Figure S4. Structures of **8e** in the wild type and E119D PA<sub>N</sub> constructs.**

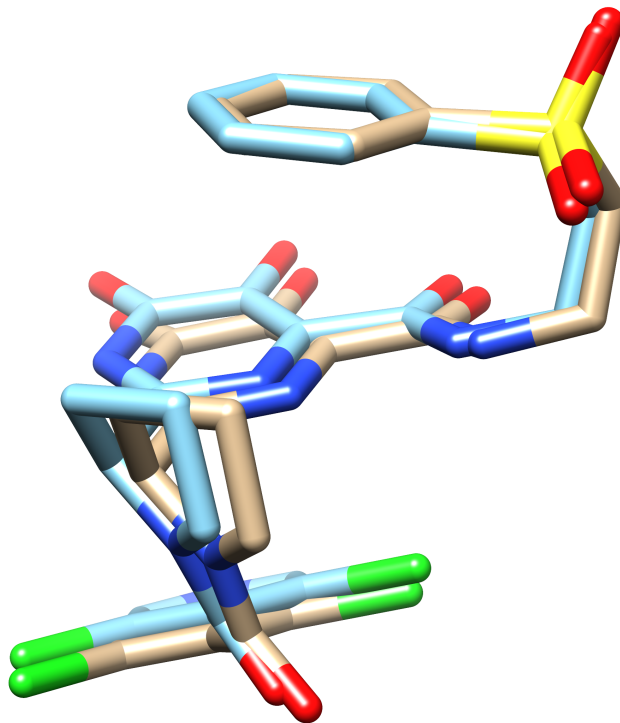

The bound 'cis-sandwich' conformation of **8e** with the wild type PA<sub>N</sub> construct (in tan), overlaid with the bound conformation observed with the E119D mutant PA<sub>N</sub> construct (in cyan). In this case, the inhibitor conformation is similar for wild type and mutant endonucleases.

**Supplementary Figure S5. Structures of 10j in the wild type and E119D PA<sub>N</sub> constructs.**

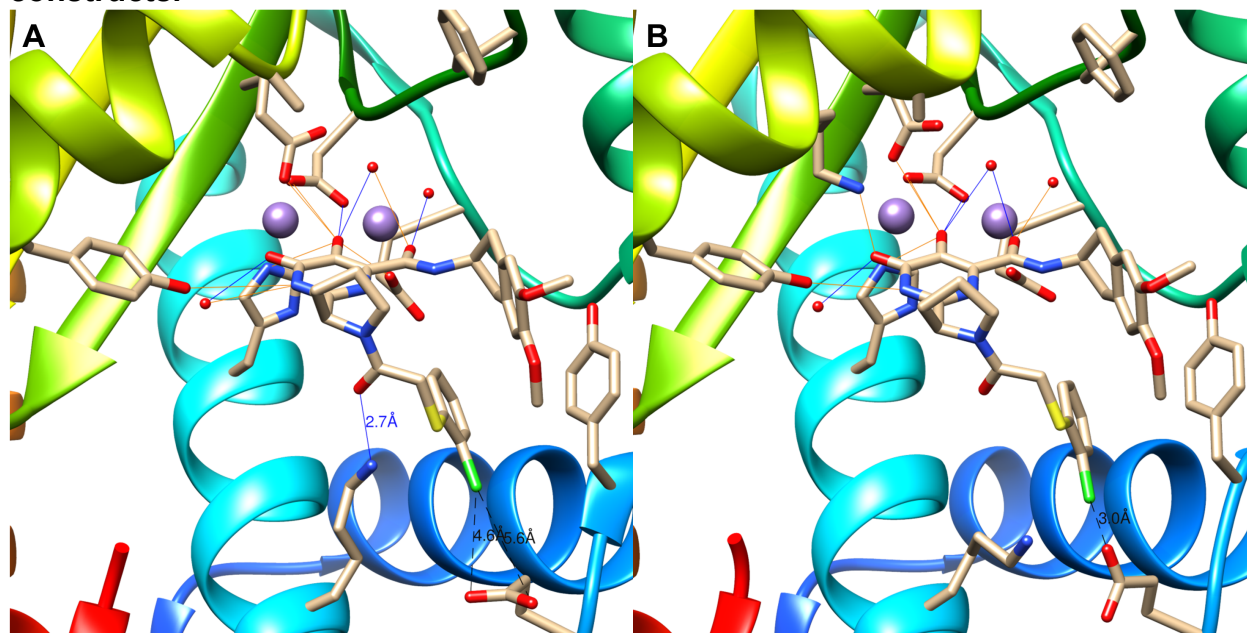

A perspective on the hydrogen bonds and close interactions seen in the co-crystal structure of **10j** in the A) wild type and B) E119D mutant PA<sub>N</sub> constructs. Hydrogen-bond interactions are indicated by the blue solid lines, interactions outside of standard distances are indicated by orange solid lines, and other more distant interactions are indicated by black dashed lines. The wild type and mutant structures show significant similarities.

**Supplementary Table S1. IC<sub>50</sub> of representative compounds in FRET based nuclease assay.**

| <b>Compounds</b> | <b>WT FP Ki (μM)</b> | <b>FRET IC<sub>50</sub> (nM)</b> |
|------------------|----------------------|----------------------------------|
| L-742,001        | 0.3 ± 0.1            | 32 ± 2                           |
| DPBA             | 3.7 ± 0.5            | 98 ± 3                           |
| 7a               | 0.36 ± 0.03          | 36 ± 1                           |
| 7b               | 0.06 ± 0.02          | 26.5 ± 0.2                       |
| 7c               | 0.07 ± 0.03          | 21.9 ± 0.2                       |
| 8e               | 0.02 ± 0.02          | 12 ± 1                           |
| 8f               | 0.01 ± 0.01          | 14.5 ± 0.2                       |
| 9b               | 0.4 ± 0.2            | 29 ± 3                           |
| 9e               | 0.4 ± 0.2            | 37.4 ± 0.8                       |
| 9k               | 0.15 ± 0.04          | 20.5 ± 0.7                       |
| 10b              | 0.9 ± 0.2            | 37 ± 6                           |
| 10e              | 0.01 ± 0.04          | 8.2 ± 0.5                        |
| 10g              | < 0.005              | 12 ± 1                           |
| 10i              | 0.3 ± 0.1            | 64.4 ± 0.8                       |
| 10j              | 0.06 ± 0.05          | 18 ± 3                           |
| 10k              | 0.29 ± 0.05          | 14 ± 1                           |

Average IC<sub>50</sub> of selected compounds in FRET based nuclease assay with PAN<sup>ΔLoop</sup> was obtained as outlined in methods and reported with respective standard deviations (n ≥ 3). Average K<sub>i</sub>s and standard deviation of the selected compounds in FP binding assay with wild type PA protein were included as comparison (n ≥ 3).



**Supplementary Table S2.  $K_i$  of representative compounds against E119D mutant in FP binding assay.**

| <b>Compounds</b> | <b>WT FP <math>K_i</math><br/>(<math>\mu\text{M}</math>)</b> | <b>E119D FP <math>K_i</math><br/>(<math>\mu\text{M}</math>)</b> |
|------------------|--------------------------------------------------------------|-----------------------------------------------------------------|
| L-742,001        | $3.7 \pm 0.5$                                                | $3 \pm 3$                                                       |
| 7a               | $0.36 \pm 0.03$                                              | $2 \pm 2$                                                       |
| 7b               | $0.06 \pm 0.02$                                              | $0.5 \pm 0.4$                                                   |
| 7c               | $0.07 \pm 0.03$                                              | $0.27 \pm 0.09$                                                 |
| 8e               | $0.02 \pm 0.02$                                              | $< 0.01$                                                        |
| 8f               | $0.01 \pm 0.01$                                              | $0.02 \pm 0.04$                                                 |
| 9b               | $0.4 \pm 0.2$                                                | $2.6 \pm 1.3$                                                   |
| 9e               | $0.4 \pm 0.2$                                                | $8 \pm 8$                                                       |
| 9f               | $0.5 \pm 0.2$                                                | $1 \pm 1$                                                       |
| 9k               | $0.15 \pm 0.04$                                              | $1.4 \pm 0.7$                                                   |
| 10e              | $0.01 \pm 0.04$                                              | $0.3 \pm 0.5$                                                   |
| 10g              | $< 0.01$                                                     | $0.1 \pm 0.5$                                                   |
| 10i              | $0.3 \pm 0.1$                                                | $9 \pm 8$                                                       |
| 10j              | $0.06 \pm 0.05$                                              | $0.8 \pm 0.4$                                                   |
| 10k              | $0.29 \pm 0.05$                                              | $7 \pm 9$                                                       |
| 10m              | $0.4 \pm 0.2$                                                | $0.6 \pm 0.7$                                                   |

Average  $K_i$  of selected compounds against E119D-PAN <sup>$\Delta$ Loop</sup> in FP binding assay was obtained as outlined in methods and reported with respective standard deviations and compared to its average  $K_i$  against wild type PA ( $n \geq 3$ ).

**Supplementary Table S3. Summary of inhibitor complexes crystallized and crystallization conditions.**

| Inhibitor | Protein | Crystallization Condition                                                                                 | Space Group        | Res. (Å) | PDB Code |
|-----------|---------|-----------------------------------------------------------------------------------------------------------|--------------------|----------|----------|
| 6d        | WT      | 0.8 M Succinic Acid pH 7.0, 2 mM MnCl <sub>2</sub> , 2 mM MgCl <sub>2</sub>                               | P3 <sub>2</sub> 21 | 2.1      | 5WDN     |
| 6e        | WT      | 0.8 M Succinic Acid pH 7.0, 5 mM MnCl <sub>2</sub> , 5 mM MgCl <sub>2</sub>                               | P3 <sub>2</sub> 21 | 1.95     | 5W3I     |
| 7b        | WT      | 0.1 M Tris pH 8.5, 30% PEG 4000, 2 mM MnCl <sub>2</sub> , 0.2 M MgCl <sub>2</sub>                         | P6 <sub>4</sub> 22 | 1.85     | 5WE9     |
| 7a        | WT      | 0.1 M Tris pH 8.5, 30% PEG 4000, 2 mM MnCl <sub>2</sub> , 0.2 M MgCl <sub>2</sub>                         | P6 <sub>4</sub> 22 | 2.1      | 5W44     |
| 7a        | F105S   | 0.1 M Tris pH 8.5, 30% PEG 4000, 2 mM MnCl <sub>2</sub> , 0.2 M MgCl <sub>2</sub>                         | P6 <sub>4</sub> 22 | 2.0      | 5WEF     |
| 7a        | E119D   | 0.1 M CAPSO pH 9.5, 0.8 M Ammonium sulfate, 50 mM MnCl <sub>2</sub> , 50 mM MgCl <sub>2</sub>             | I422               | 2.25     | 5WEI     |
| 6c        | WT      | 0.1 M Tris pH 8.5, 24% PEG 6000, 1 M LiCl, 0.1 M Na-Acetate                                               | P6 <sub>4</sub> 22 | 2.3      | 5WCT     |
|           | WT      | 0.8 M Succinic Acid pH 7.0, 1 mM MnCl <sub>2</sub> , 1 mM MgCl <sub>2</sub>                               | P3 <sub>2</sub> 21 | 2.12     | 5WE7     |
| 6b        | WT      | 0.1 M Tris pH 8.5, 30% PEG 3000, 2 mM MnCl <sub>2</sub> , 0.2 M MgCl <sub>2</sub>                         | P6 <sub>4</sub> 22 | 2.52     | 5WCS     |
| 9f        | WT      | 0.1 M HEPES pH 7.8, 1% PVP K15, 1.0 M Ammonium sulfate, 10 mM MnCl <sub>2</sub> , 10 mM MgCl <sub>2</sub> | I422               | 2.2      | 5W73     |
| 9e        | WT      | 0.1 M HEPES pH 7.8, 1% PVP K15, 1.0 M Ammonium sulfate, 10 mM MnCl <sub>2</sub> , 10 mM MgCl <sub>2</sub> | I422               | 2.1      | 5WDC     |
| 8f        | WT      | 0.1 M CAPSO pH 9.5, 1 M Ammonium sulfate, 10 mM MnCl <sub>2</sub> , 10 mM MgCl <sub>2</sub>               | I422               | 2.2      | 5W7U     |
| 9h        | WT      | 0.1 M HEPES pH 7.8, 1% PVP K15, 1.0 M Ammonium sulfate, 10 mM MnCl <sub>2</sub> , 10 mM MgCl <sub>2</sub> | I422               | 2.25     | 5WA6     |
| 9k        | WT      | 0.1 M HEPES pH 7.8, 1% PVP K15, 1.0 M Ammonium sulfate, 10 mM MnCl <sub>2</sub> , 10 mM MgCl <sub>2</sub> | I422               | 2.1      | 5W9G     |
| 9k        | E119D   | 0.1 M CAPSO pH 9.4, 1 M Ammonium sulfate, 50 mM MnCl <sub>2</sub> , 50 mM MgCl <sub>2</sub>               | I422               | 2.3      | 5WF3     |
| 10e       | WT      | 0.1 M HEPES pH 7.8, 1% PVP K15, 1.0 M Ammonium sulfate, 10 mM MnCl <sub>2</sub> , 10 mM MgCl <sub>2</sub> | I422               | 2.25     | 5WEB     |
| 10e       | E119D   | 0.1 M CAPSO pH 9.4, 1 M Ammonium sulfate, 50 mM MnCl <sub>2</sub> , 50 mM MgCl <sub>2</sub>               | I422               | 2.25     | 5WFM     |
| 10i       | WT      | 0.1 M CAPSO pH 9.5,                                                                                       | I422               | 2.2      | 5WAP     |

|     |       |                                                                                                                   |      |      |      |
|-----|-------|-------------------------------------------------------------------------------------------------------------------|------|------|------|
|     |       | 1 M Ammonium sulfate,<br>10 mM MnCl <sub>2</sub> , 10 mM MgCl <sub>2</sub>                                        |      |      |      |
| 10j | WT    | 0.1 M HEPES pH 7.8, 1% PVP K15,<br>1.0 M Ammonium sulfate,<br>10 mM MnCl <sub>2</sub> , 10 mM MgCl <sub>2</sub>   | I422 | 2.2  | 5WB3 |
| 10j | E119D | 0.1 M CAPSO pH 9.4,<br>1 M Ammonium sulfate,<br>50 mM MnCl <sub>2</sub> , 50 mM MgCl <sub>2</sub>                 | I422 | 2.3  | 5WFW |
| 10k | WT    | 0.1 M CAPSO pH 9.5,<br>1 M Ammonium sulfate,<br>10 mM MnCl <sub>2</sub> , 10 mM MgCl <sub>2</sub>                 | I422 | 2.2  | 5WDW |
| 8e  | WT    | 0.1 M HEPES pH 7.8, 1% PVP K15,<br>1.0 M Ammonium sulfate,<br>10 mM MnCl <sub>2</sub> , 10 mM MgCl <sub>2</sub> , | I422 | 2.3  | 5W92 |
| 8e  | E119D | 0.1 M CAPSO pH 9.6,<br>1.1 M Ammonium sulfate,<br>50 mM MnCl <sub>2</sub> , 50 mM MgCl <sub>2</sub>               | I422 | 2.35 | 5WFZ |
| 9b  | WT    | 0.1 M HEPES pH 7.8, 1% PVP K15,<br>1.0 M Ammonium sulfate,<br>10 mM MnCl <sub>2</sub> , 10 mM MgCl <sub>2</sub> , | I422 | 2.2  | 5WA7 |
| 9b  | E119D | 0.1 M CAPSO pH 9.4,<br>1 M Ammonium sulfate,<br>50 mM MnCl <sub>2</sub> , 50 mM MgCl <sub>2</sub>                 | I422 | 2.3  | 5WG9 |

**Supplementary Table S4. X-ray data collection and refinement statistics.**

|                                                     | PA <sub>N</sub> -(6d)<br>(PDB ID: 5WDN) | PA <sub>N</sub> -(6e)<br>(PDB ID: 5W31) | PA <sub>N</sub> -(7b)<br>(PDB ID: 5WE9) |
|-----------------------------------------------------|-----------------------------------------|-----------------------------------------|-----------------------------------------|
| <b>Data collection</b>                              |                                         |                                         |                                         |
| Space group                                         | P3 <sub>2</sub> 21                      | P3 <sub>2</sub> 21                      | P6 <sub>4</sub> 22                      |
| Cell dimensions                                     |                                         |                                         |                                         |
| <i>a</i> , <i>b</i> , <i>c</i> (Å)                  | 60.168 60.168 94.443                    | 61.162 61.162 94.813                    | 74.081 74.081 127.694                   |
| $\alpha$ , $\beta$ , $\gamma$ (°)                   | 90 90 120                               | 90 90 120                               | 90 90 120                               |
| Resolution (Å)                                      | 50 - 2.1 (2.17 - 2.1) <sup>a</sup>      | 50 - 1.95 (2.02 - 1.95)                 | 50 - 1.85 (1.92 - 1.85)                 |
| <i>R</i> <sub>meas</sub>                            | 0.082 (0.713)                           | 0.07 (1.003)                            | 0.067 (0.922)                           |
| <i>I</i> / $\sigma$ ( <i>I</i> )                    | 31.2 (4.3)                              | 31.4 (2.8)                              | 42.5 (2.4)                              |
| Completeness (%)                                    | 99.64 (100.00)                          | 100.0 (100.0)                           | 99.9 (99.7)                             |
| Redundancy                                          | 10.7 (10.7)                             | 11.2 (10.3)                             | 17.5 (11.9)                             |
| <b>Refinement</b>                                   |                                         |                                         |                                         |
| Resolution (Å)                                      | 34.99 - 2.1 (2.17 - 2.1)                | 35.32 - 1.95 (2.02 - 1.95)              | 35.57 - 1.85 (1.94 - 1.85)              |
| No. reflections                                     | 11985 (1170)                            | 15150 (1205)                            | 18206 (1108)                            |
| <i>R</i> <sub>work</sub> / <i>R</i> <sub>free</sub> | 0.2168 / 0.2321                         | 0.1753 / 0.2011                         | 0.1794 / 0.2066                         |
| No. atoms                                           | 1499                                    | 1541                                    | 1621                                    |
| Protein                                             | 1434                                    | 1423                                    | 1445                                    |
| Ligand/ion                                          | 28                                      | 38                                      | 75                                      |
| Water                                               | 37                                      | 80                                      | 101                                     |
| <i>B</i> factors                                    |                                         |                                         |                                         |
| Protein                                             | 67.58                                   | 24.42                                   | 45.82                                   |
| Ligand/ion                                          | 65.62                                   | 34.05                                   | 40.07                                   |
| Water                                               | 60.43                                   | 32.78                                   | 52.73                                   |
| R.m.s. deviations                                   |                                         |                                         |                                         |
| Bond lengths (Å)                                    | 0.002                                   | 0.005                                   | 0.010                                   |
| Bond angles (°)                                     | 0.53                                    | 0.73                                    | 1.01                                    |

<sup>a</sup> Values in parentheses are for highest-resolution shell.

**Supplementary Table S5. X-ray data collection and refinement statistics.**

|                                                     | PA <sub>N</sub> -(7a)<br>(PDB ID: 5W44) | PA <sub>N</sub> F105S-(7a)<br>(PDB ID: 5WEF) | PA <sub>N</sub> E119D-(7a)<br>(PDB ID: 5WEI) |
|-----------------------------------------------------|-----------------------------------------|----------------------------------------------|----------------------------------------------|
| <b>Data collection</b>                              |                                         |                                              |                                              |
| Space group                                         | P6 <sub>4</sub> 22                      | P6 <sub>4</sub> 22                           | I422                                         |
| Cell dimensions                                     |                                         |                                              |                                              |
| <i>a</i> , <i>b</i> , <i>c</i> (Å)                  | 74.111 74.111 127.845                   | 73.878 73.878 127.282                        | 89.474 89.474 133.662                        |
| $\alpha$ , $\beta$ , $\gamma$ (°)                   | 90 90 120                               | 90 90 120                                    | 90 90 90                                     |
| Resolution (Å)                                      | 50 - 2.10 (2.18 - 2.10) <sup>a</sup>    | 50 - 1.99 (2.06 - 1.99)                      | 50 - 2.25 (2.33 - 2.25)                      |
| <i>R</i> <sub>meas</sub>                            | 0.097 (0.650)                           | 0.094 (1.000)                                | 0.105 (1.000)                                |
| <i>I</i> / $\sigma$ ( <i>I</i> )                    | 35.5 (3.2)                              | 43.6 (1.9)                                   | 29.4 (1.2)                                   |
| Completeness (%)                                    | 99.7 (97.6)                             | 99.9 (100.0)                                 | 99.6 (97.5)                                  |
| Redundancy                                          | 16.5 (11.6)                             | 13.8 (13.7)                                  | 8.6 (5.9)                                    |
| <b>Refinement</b>                                   |                                         |                                              |                                              |
| Resolution (Å)                                      | 42.61 - 2.10 (2.17 - 2.10)              | 31.95 - 1.99 (2.06 - 1.99)                   | 37.18 - 2.25 (2.33 - 2.25)                   |
| No. reflections                                     | 12679 (1184)                            | 14686 (1382)                                 | 13216 (1241)                                 |
| <i>R</i> <sub>work</sub> / <i>R</i> <sub>free</sub> | 0.1871 / 0.2283                         | 0.1940 / 0.2269                              | 0.1965 / 0.2210                              |
| No. atoms                                           | 1541                                    | 1529                                         | 1466                                         |
| Protein                                             | 1443                                    | 1420                                         | 1412                                         |
| Ligand/ion                                          | 37                                      | 49                                           | 38                                           |
| Water                                               | 61                                      | 60                                           | 16                                           |
| <i>B</i> factors                                    |                                         |                                              |                                              |
| Protein                                             | 51.88                                   | 62.24                                        | 77.92                                        |
| Ligand/ion                                          | 52.96                                   | 71.31                                        | 120.54                                       |
| Water                                               | 50.70                                   | 60.73                                        | 77.22                                        |
| R.m.s. deviations                                   |                                         |                                              |                                              |
| Bond lengths (Å)                                    | 0.009                                   | 0.017                                        | 0.004                                        |
| Bond angles (°)                                     | 0.84                                    | 1.34                                         | 0.60                                         |

<sup>a</sup> Values in parentheses are for highest-resolution shell.

**Supplementary Table S6. X-ray data collection and refinement statistics.**

|                                                     | PA <sub>N</sub> -(6c)<br>(PDB ID: 5WCT) | PA <sub>N</sub> -(6b)<br>(PDB ID: 5WCS) |
|-----------------------------------------------------|-----------------------------------------|-----------------------------------------|
| <b>Data collection</b>                              |                                         |                                         |
| Space group                                         | P6 <sub>4</sub> 22                      | P6 <sub>4</sub> 22                      |
| Cell dimensions                                     |                                         |                                         |
| <i>a</i> , <i>b</i> , <i>c</i> (Å)                  | 74.561 74.561 125.062                   | 74.666 74.666 125.722                   |
| $\alpha$ , $\beta$ , $\gamma$ (°)                   | 90 90 120                               | 90 90 120                               |
| Resolution (Å)                                      | 50 - 2.30 (2.38 - 2.30) <sup>a</sup>    | 50 - 2.53 (2.62 - 2.53)                 |
| <i>R</i> <sub>meas</sub>                            | 0.111 (1.024)                           | 0.125 (1.096)                           |
| <i>I</i> / $\sigma$ ( <i>I</i> )                    | 37.8 (2.1)                              | 35.3 (2.4)                              |
| Completeness (%)                                    | 97.6 (88.7)                             | 99.7 (97.6)                             |
| Redundancy                                          | 16.5 (15)                               | 21.4 (15.3)                             |
| <b>Refinement</b>                                   |                                         |                                         |
| Resolution (Å)                                      | 35.02 - 2.30 (2.38 - 2.30)              | 35.17 - 2.53 (2.62 - 2.53)              |
| No. reflections                                     | 9475 (785)                              | 7447 (696)                              |
| <i>R</i> <sub>work</sub> / <i>R</i> <sub>free</sub> | 0.2188 / 0.2549                         | 0.2063 / 0.2402                         |
| No. atoms                                           | 1445                                    | 1495                                    |
| Protein                                             | 1401                                    | 1440                                    |
| Ligand/ion                                          | 28                                      | 32                                      |
| Water                                               | 16                                      | 23                                      |
| <i>B</i> factors                                    |                                         |                                         |
| Protein                                             | 87.24                                   | 71.74                                   |
| Ligand/ion                                          | 72.20                                   | 104.17                                  |
| Water                                               | 67.75                                   | 58.82                                   |
| R.m.s. deviations                                   |                                         |                                         |
| Bond lengths (Å)                                    | 0.008                                   | 0.002                                   |
| Bond angles (°)                                     | 0.89                                    | 0.42                                    |

<sup>a</sup> Values in parentheses are for highest-resolution shell.



**Supplementary Table S7. X-ray data collection and refinement statistics.**

|                                                     | PA <sub>N</sub> -(9f)<br>(PDB ID: 5W73) | PA <sub>N</sub> -(9e)<br>(PDB ID: 5WDC) | PA <sub>N</sub> -(8f)<br>(PDB ID: 5W7U) |
|-----------------------------------------------------|-----------------------------------------|-----------------------------------------|-----------------------------------------|
| <b>Data collection</b>                              |                                         |                                         |                                         |
| Space group                                         | I422                                    | I422                                    | I422                                    |
| Cell dimensions                                     |                                         |                                         |                                         |
| <i>a</i> , <i>b</i> , <i>c</i> (Å)                  | 89.843 89.843 135.002                   | 90.777 90.777 134.545                   | 90.746 90.746 135.256                   |
| $\alpha$ , $\beta$ , $\gamma$ (°)                   | 90 90 90                                | 90 90 90                                | 90 90 90                                |
| Resolution (Å)                                      | 50 - 2.20 (2.28 - 2.20) <sup>a</sup>    | 50 - 2.10 (2.18 - 2.10)                 | 50 - 2.20 (2.28 - 2.20)                 |
| <i>R</i> <sub>meas</sub>                            | 0.061 (1.019)                           | 0.063 (1.067)                           | 0.054 (0.760)                           |
| <i>I</i> / $\sigma$ ( <i>I</i> )                    | 36.8 (1.5)                              | 34.9 (1.4)                              | 40.7 (1.8)                              |
| Completeness (%)                                    | 99.9 (98.9)                             | 99.1 (93.0)                             | 98.89 (92.41)                           |
| Redundancy                                          | 7.2 (6.6)                               | 7.7 (6.4)                               | 9.3 (6.9)                               |
| <b>Refinement</b>                                   |                                         |                                         |                                         |
| Resolution (Å)                                      | 40.24 - 2.20 (2.28 - 2.20)              | 37.63 - 2.10 (2.18 - 2.10)              | 32.08 - 2.20 (2.28 - 2.20)              |
| No. reflections                                     | 14360 (1387)                            | 16680 (1546)                            | 14581 (1328)                            |
| <i>R</i> <sub>work</sub> / <i>R</i> <sub>free</sub> | 0.2225 / 0.2488                         | 0.2182 / 0.2422                         | 0.2185 / 0.2443                         |
| No. atoms                                           | 1477                                    | 1468                                    | 1447                                    |
| Protein                                             | 1417                                    | 1404                                    | 1399                                    |
| Ligand/ion                                          | 48                                      | 47                                      | 37                                      |
| Water                                               | 12                                      | 17                                      | 11                                      |
| <i>B</i> factors                                    |                                         |                                         |                                         |
| Protein                                             | 82.17                                   | 78.69                                   | 89.82                                   |
| Ligand/ion                                          | 101.27                                  | 95.20                                   | 99.46                                   |
| Water                                               | 71.72                                   | 76.85                                   | 77.48                                   |
| R.m.s. deviations                                   |                                         |                                         |                                         |
| Bond lengths (Å)                                    | 0.004                                   | 0.004                                   | 0.008                                   |
| Bond angles (°)                                     | 0.54                                    | 0.57                                    | 0.91                                    |

<sup>a</sup> Values in parentheses are for highest-resolution shell.

**Supplementary Table S8. X-ray data collection and refinement statistics.**

|                                                     | PA <sub>N</sub> -(9h)<br>(PDB ID: 5WA6) | PA <sub>N</sub> -(9k)<br>(PDB ID: 5W9G) | PA <sub>N</sub> -(10e)<br>(PDB ID: 5WEB) |
|-----------------------------------------------------|-----------------------------------------|-----------------------------------------|------------------------------------------|
| <b>Data collection</b>                              |                                         |                                         |                                          |
| Space group                                         | I422                                    | I422                                    | I422                                     |
| Cell dimensions                                     |                                         |                                         |                                          |
| <i>a</i> , <i>b</i> , <i>c</i> (Å)                  | 90.563 90.563 135.167                   | 90.249 90.249 135.307                   | 90.793 90.793 135.062                    |
| $\alpha$ , $\beta$ , $\gamma$ (°)                   | 90 90 90                                | 90 90 90                                | 90 90 90                                 |
| Resolution (Å)                                      | 50 - 2.25 (2.33 - 2.25) <sup>a</sup>    | 50 - 2.10 (2.18 - 2.10)                 | 50 - 2.25 (2.33 - 2.25)                  |
| <i>R</i> <sub>meas</sub>                            | 0.071 (1.215)                           | 0.061 (1.092)                           | 0.064 (1.198)                            |
| <i>I</i> / $\sigma$ ( <i>I</i> )                    | 36.0 (1.5)                              | 38.3 (1.5)                              | 36.5 (1.6)                               |
| Completeness (%)                                    | 99.9 (99.4)                             | 99.4 (95.6)                             | 99.8 (99.8)                              |
| Redundancy                                          | 7.8 (7.0)                               | 7.5 (6.7)                               | 7.0 (6.8)                                |
| <b>Refinement</b>                                   |                                         |                                         |                                          |
| Resolution (Å)                                      | 38.8 - 2.25 (2.33 - 2.25)               | 38.68 - 2.10 (2.17 - 2.10)              | 38.88 - 2.25 (2.33 - 2.25)               |
| No. reflections                                     | 13738 (1355)                            | 16669 (1556)                            | 13680 (1342)                             |
| <i>R</i> <sub>work</sub> / <i>R</i> <sub>free</sub> | 0.2307 / 0.2535                         | 0.2249 / 0.2409                         | 0.2192 / 0.2546                          |
| No. atoms                                           | 1453                                    | 1450                                    | 1513                                     |
| Protein                                             | 1407                                    | 1389                                    | 1409                                     |
| Ligand/ion                                          | 38                                      | 44                                      | 88                                       |
| Water                                               | 8                                       | 17                                      | 16                                       |
| <i>B</i> factors                                    |                                         |                                         |                                          |
| Protein                                             | 91.32                                   | 84.76                                   | 89.81                                    |
| Ligand/ion                                          | 102.91                                  | 106.49                                  | 98.40                                    |
| Water                                               | 82.39                                   | 75.48                                   | 89.53                                    |
| R.m.s. deviations                                   |                                         |                                         |                                          |
| Bond lengths (Å)                                    | 0.003                                   | 0.003                                   | 0.008                                    |
| Bond angles (°)                                     | 0.61                                    | 0.59                                    | 0.90                                     |

<sup>a</sup> Values in parentheses are for highest-resolution shell.

**Supplementary Table S9. X-ray data collection and refinement statistics.**

|                                                     | PA <sub>N</sub> -(10i)<br>(PDB ID: 5WAP) | PA <sub>N</sub> -(10j)<br>(PDB ID: 5WB3) | PA <sub>N</sub> -(10k)<br>(PDB ID: 5WDW) |
|-----------------------------------------------------|------------------------------------------|------------------------------------------|------------------------------------------|
| <b>Data collection</b>                              |                                          |                                          |                                          |
| Space group                                         | I422                                     | I422                                     | I422                                     |
| Cell dimensions                                     |                                          |                                          |                                          |
| <i>a</i> , <i>b</i> , <i>c</i> (Å)                  | 90.653 90.653 135.17                     | 90.698 90.698 134.31                     | 90.744 90.744 135.876                    |
| $\alpha$ , $\beta$ , $\gamma$ (°)                   | 90 90 90                                 | 90 90 90                                 | 90 90 90                                 |
| Resolution (Å)                                      | 50 - 2.20 (2.28 - 2.20) <sup>a</sup>     | 50 - 2.20 (2.28 - 2.20)                  | 50 - 2.30 (2.38 - 2.30)                  |
| <i>R</i> <sub>meas</sub>                            | 0.079 (0.879)                            | 0.068 (1.148)                            | 0.058 (0.810)                            |
| <i>I</i> / $\sigma$ ( <i>I</i> )                    | 31.3 (1.7)                               | 35.8 (2.0)                               | 35.5 (2.0)                               |
| Completeness (%)                                    | 99.7 (97.5)                              | 100.0 (100.0)                            | 99.3 (98.4)                              |
| Redundancy                                          | 8.4 (6.7)                                | 7.8 (7.8)                                | 9.4 (7.8)                                |
| <b>Refinement</b>                                   |                                          |                                          |                                          |
| Resolution (Å)                                      | 32.05 - 2.20 (2.28 - 2.20)               | 30.06 - 2.20 (2.28 - 2.20)               | 32.08 - 2.30 (2.38 - 2.30)               |
| No. reflections                                     | 14617 (1389)                             | 14543 (1410)                             | 12940 (1240)                             |
| <i>R</i> <sub>work</sub> / <i>R</i> <sub>free</sub> | 0.2260 / 0.2447                          | 0.2152 / 0.2417                          | 0.2401 / 0.2854                          |
| No. atoms                                           | 1457                                     | 1478                                     | 1424                                     |
| Protein                                             | 1404                                     | 1410                                     | 1381                                     |
| Ligand/ion                                          | 43                                       | 52                                       | 39                                       |
| Water                                               | 10                                       | 16                                       | 4                                        |
| <i>B</i> factors                                    |                                          |                                          |                                          |
| Protein                                             | 82.80                                    | 77.31                                    | 88.12                                    |
| Ligand/ion                                          | 90.80                                    | 95.14                                    | 99.65                                    |
| Water                                               | 77.53                                    | 71.53                                    | 71.29                                    |
| R.m.s. deviations                                   |                                          |                                          |                                          |
| Bond lengths (Å)                                    | 0.002                                    | 0.004                                    | 0.003                                    |
| Bond angles (°)                                     | 0.47                                     | 0.58                                     | 0.51                                     |

<sup>a</sup> Values in parentheses are for highest-resolution shell.

**Supplementary Table S10. X-ray data collection and refinement statistics.**

|                                                     | PA <sub>N</sub> -(8e)<br>(PDB ID: 5W92) | PA <sub>N</sub> -(9b)<br>(PDB ID: 5WA7) |
|-----------------------------------------------------|-----------------------------------------|-----------------------------------------|
| <b>Data collection</b>                              |                                         |                                         |
| Space group                                         | I422                                    | I422                                    |
| Cell dimensions                                     |                                         |                                         |
| <i>a</i> , <i>b</i> , <i>c</i> (Å)                  | 90.448 90.448 134.167                   | 90.298 90.298 135.708                   |
| $\alpha$ , $\beta$ , $\gamma$ (°)                   | 90 90 90                                | 90 90 90                                |
| Resolution (Å)                                      | 50 - 2.30 (2.38 - 2.30) <sup>a</sup>    | 50 - 2.20 (2.28 - 2.20)                 |
| <i>R</i> <sub>meas</sub>                            | 0.1 (1.248)                             | 0.068 (1.512)                           |
| <i>I</i> / $\sigma$ ( <i>I</i> )                    | 32.0 (1.7)                              | 32.7 (1.3)                              |
| Completeness (%)                                    | 99.9 (100.0)                            | 99.3 (98.9)                             |
| Redundancy                                          | 7.4 (7.5)                               | 7.0 (6.7)                               |
| <b>Refinement</b>                                   |                                         |                                         |
| Resolution (Å)                                      | 38.73 - 2.30 (2.38 - 2.30)              | 40.44 - 2.20 (2.28 - 2.20)              |
| No. reflections                                     | 12733 (1262)                            | 14445 (1391)                            |
| <i>R</i> <sub>work</sub> / <i>R</i> <sub>free</sub> | 0.2122 / 0.2574                         | 0.2319 / 0.2494                         |
| No. atoms                                           | 1496                                    | 1455                                    |
| Protein                                             | 1402                                    | 1401                                    |
| Ligand/ion                                          | 78                                      | 43                                      |
| Water                                               | 16                                      | 11                                      |
| <i>B</i> factors                                    |                                         |                                         |
| Protein                                             | 80.26                                   | 89.87                                   |
| Ligand/ion                                          | 111.46                                  | 130.24                                  |
| Water                                               | 74.60                                   | 80.03                                   |
| R.m.s. deviations                                   |                                         |                                         |
| Bond lengths (Å)                                    | 0.007                                   | 0.003                                   |
| Bond angles (°)                                     | 0.76                                    | 0.53                                    |

<sup>a</sup> Values in parentheses are for highest-resolution shell.

**Supplementary Table S11. X-ray data collection and refinement statistics.**

|                                                     | PA <sub>N</sub> E119D-(9k)<br>(PDB ID: 5WF3) | PA <sub>N</sub> E119D-(10e)<br>(PDB ID: 5WFM) | PA <sub>N</sub> E119D-(10j)<br>(PDB ID: 5WFW) |
|-----------------------------------------------------|----------------------------------------------|-----------------------------------------------|-----------------------------------------------|
| <b>Data collection</b>                              |                                              |                                               |                                               |
| Space group                                         | I422                                         | I422                                          | I422                                          |
| Cell dimensions                                     |                                              |                                               |                                               |
| <i>a</i> , <i>b</i> , <i>c</i> (Å)                  | 90.679 90.679 133.752                        | 90.902 90.902 133.737                         | 90.425 90.425 133.813                         |
| $\alpha$ , $\beta$ , $\gamma$ (°)                   | 90 90 90                                     | 90 90 90                                      | 90 90 90                                      |
| Resolution (Å)                                      | 50 - 2.25 (2.33 - 2.25) <sup>a</sup>         | 50 - 2.25 (2.33 - 2.25)                       | 50 - 2.29 (2.37 - 2.29)                       |
| <i>R</i> <sub>meas</sub>                            | 0.136 (0.809)                                | 0.083 (1.000)                                 | 0.094 (1.000)                                 |
| <i>I</i> / $\sigma$ ( <i>I</i> )                    | 25.0 (1.8)                                   | 30.5 (2.0)                                    | 29.9 (2.1)                                    |
| Completeness (%)                                    | 98.6 (88.2)                                  | 99.9 (99.9)                                   | 99.9 (100.0)                                  |
| Redundancy                                          | 9.5 (4.9)                                    | 10.7 (8.9)                                    | 10.0 (8.0)                                    |
| <b>Refinement</b>                                   |                                              |                                               |                                               |
| Resolution (Å)                                      | 32.06 - 2.25 (2.33 - 2.25)                   | 37.59 - 2.25 (2.33 - 2.25)                    | 29.96 - 2.29 (2.37 - 2.29)                    |
| No. reflections                                     | 13412 (1170)                                 | 13661 (1344)                                  | 12811 (1243)                                  |
| <i>R</i> <sub>work</sub> / <i>R</i> <sub>free</sub> | 0.2037 / 0.2270                              | 0.2048 / 0.2254                               | 0.2127 / 0.2235                               |
| No. atoms                                           | 1460                                         | 1557                                          | 1491                                          |
| Protein                                             | 1402                                         | 1439                                          | 1422                                          |
| Ligand/ion                                          | 48                                           | 88                                            | 52                                            |
| Water                                               | 10                                           | 30                                            | 17                                            |
| <i>B</i> factors                                    |                                              |                                               |                                               |
| Protein                                             | 72.51                                        | 70.05                                         | 77.03                                         |
| Ligand/ion                                          | 102.86                                       | 77.67                                         | 101.7                                         |
| Water                                               | 69.77                                        | 69.10                                         | 76.78                                         |
| R.m.s. deviations                                   |                                              |                                               |                                               |
| Bond lengths (Å)                                    | 0.006                                        | 0.002                                         | 0.004                                         |
| Bond angles (°)                                     | 0.59                                         | 0.47                                          | 0.61                                          |

<sup>a</sup> Values in parentheses are for highest-resolution shell.

**Supplementary Table S12. X-ray data collection and refinement statistics.**

|                                                     | PA <sub>N</sub> E119D-(8e)<br>(PDB ID: 5WFZ) | PA <sub>N</sub> E119D-(9b)<br>(PDB ID: 5WG9) |
|-----------------------------------------------------|----------------------------------------------|----------------------------------------------|
| <b>Data collection</b>                              |                                              |                                              |
| Space group                                         | I422                                         | I422                                         |
| Cell dimensions                                     |                                              |                                              |
| <i>a</i> , <i>b</i> , <i>c</i> (Å)                  | 90.3 90.3 133.353                            | 90.612 90.612 133.788                        |
| $\alpha$ , $\beta$ , $\gamma$ (°)                   | 90 90 90                                     | 90 90 90                                     |
| Resolution (Å)                                      | 50 - 2.35 (2.43 - 2.35) <sup>a</sup>         | 50 - 2.29 (2.37 - 2.29)                      |
| <i>R</i> <sub>meas</sub>                            | 0.093 (0.986)                                | 0.103 (0.776)                                |
| <i>I</i> / $\sigma$ ( <i>I</i> )                    | 21.8 (1.7)                                   | 25.0 (2.0)                                   |
| Completeness (%)                                    | 99.9 (99.9)                                  | 98.73 (90.40)                                |
| Redundancy                                          | 6.9 (6.5)                                    | 8.7 (4.5)                                    |
| <b>Refinement</b>                                   |                                              |                                              |
| Resolution (Å)                                      | 31.93 - 2.35 (2.43 - 2.35)                   | 29.99 - 2.29 (2.37 - 2.29)                   |
| No. reflections                                     | 11859 (1170)                                 | 12714 (1149)                                 |
| <i>R</i> <sub>work</sub> / <i>R</i> <sub>free</sub> | 0.2072 / 0.2270                              | 0.1983 / 0.2207                              |
| No. atoms                                           | 1511                                         | 1468                                         |
| Protein                                             | 1426                                         | 1401                                         |
| Ligand/ion                                          | 55                                           | 48                                           |
| Water                                               | 30                                           | 19                                           |
| <i>B</i> factors                                    |                                              |                                              |
| Protein                                             | 63.62                                        | 74.73                                        |
| Ligand/ion                                          | 109.66                                       | 95.91                                        |
| Water                                               | 63.81                                        | 77.62                                        |
| R.m.s. deviations                                   |                                              |                                              |
| Bond lengths (Å)                                    | 0.002                                        | 0.006                                        |
| Bond angles (°)                                     | 0.42                                         | 0.84                                         |

<sup>a</sup> Values in parentheses are for highest-resolution shell.



## Synthesis of Library Compounds:

**General Remarks.** Reagents were obtained from Sigma Aldrich, Oakwood Chemical, TCI America, AK Scientific, Enamine, Life Chemicals, Ark Pharm, J + W Pharm Lab, Acros, or Combi-Blocks at the highest grade available and were used as purchased. Automated flash chromatography purifications were conducted using Biotage SNAP cartridges for normal phase purification and Biotage KP-C18-HS SNAP cartridges for reverse phase purifications on Biotage SP-4 or Isolera Four systems. NMR experiments were conducted using a 400 MHz Varian instrument. Compounds tested were of >95% purity (average based on UV detection at 280 nm) as determined by high pressure liquid chromatography (HPLC) conducted on an XBridge C18 5  $\mu$ m 4.6 x 250 mm column with gradient elution using 0.1% formic acid in water/acetonitrile mobile phase. LCMS data was obtained on an LCQ Fleet Ion Trap Mass Spectrometer (Thermo Scientific) coupled to the Finnigan Surveyor Plus HPLC System (Thermo Scientific).

### Supplementary Scheme 1. Synthesis of dimethyl 2-(((Z)-amino((S)-1-((benzyloxy)carbonyl)pyrrolidin-2-yl)methylene)amino)oxy)maleate.

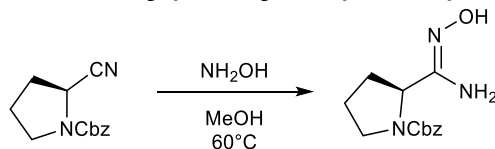

**(S,E)-benzyl 2-(N'-hydroxycarbamimidoyl)pyrrolidine-1-carboxylate.** To a solution of Z-L-prolinamide (2.8 g, 12 mmol, 1 eq.) in methanol (25 mL) at room temperature was added a solution of hydroxylamine (50 wt. % in H<sub>2</sub>O, 0.74 mL, 12 mmol, 1 eq.). The reaction mixture was stirred at 60°C for 3 h then concentrated *in vacuo* to obtain a white solid (3.0 g, 95%). <sup>1</sup>H NMR (400 MHz, DMSO-*d*<sub>6</sub>):  $\delta$  ppm = 9.03 (d, *J* = 18.8 Hz, 1H), 7.50 – 7.21 (m, 6H), 5.48 – 5.23 (m, 2H), 5.06 (d, *J* = 9.5 Hz, 2H), 4.39 – 4.20 (m, 1H), 3.43 (d, *J* = 7.5 Hz, 1H), 3.34 (d, *J* = 5.6 Hz, 2H), 2.01 – 1.71 (m, 4H). LCMS (ESI): *m/z* = 263 [M + H]<sup>+</sup>.

### Supplementary Scheme 2. Synthesis of methyl (S)-2-(1-((benzyloxy)carbonyl)pyrrolidin-2-yl)-6-oxo-5-(pivaloyloxy)-1,6-dihydropyrimidine-4-carboxylate.

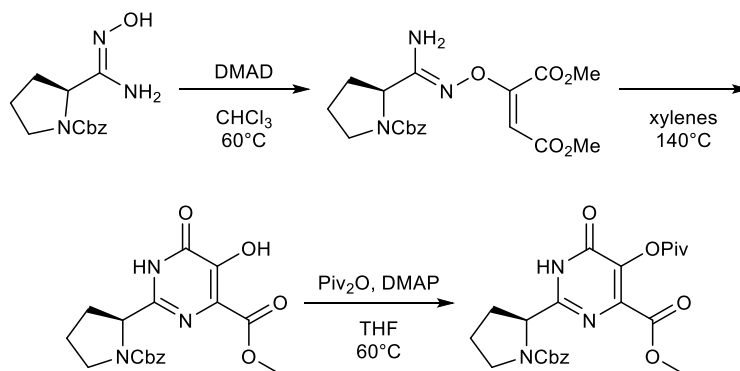

**methyl (S)-2-(1-((benzyloxy)carbonyl)pyrrolidin-2-yl)-6-oxo-5-(pivaloyloxy)-1,6-dihydropyrimidine-4-carboxylate.** To a suspension of (S,E)-benzyl 2-(N'-hydroxycarbamimidoyl)pyrrolidine-1-carboxylate (1.1 g, 4.1 mmol, 1 eq.) in methanol (10 mL) at room temperature was added dimethyl acetylene dicarboxylate (0.50 mL, 4.1 mmol, 1 eq.). The reaction mixture was stirred at 60°C under N<sub>2</sub> for 3 h, then cooled to room temperature and concentrated *in vacuo*. The crude product was resuspended in

xylenes (10 mL) and stirred at 140°C for 16 h. After cooling to room temperature the reaction mixture was cooled to room temperature, concentrated *in vacuo* and the crude material was used without purification.

The crude material was diluted in anhydrous THF (5 mL) at room temperature and 4-dimethylaminopyridine (0.043 g, 0.35 mmol, 0.1 eq.) was added, followed by pivalic anhydride (0.88 mL, 4.4 mmol, 1.1 eq.). The reaction mixture was stirred at 60°C under N<sub>2</sub> for 2 h, then concentrated *in vacuo*. Purification by automated flash chromatography (*n*-hexane/EtOAc) gave an orange foam (0.60 g, 38%). <sup>1</sup>H NMR (400 MHz, Methanol-*d*<sub>4</sub>): δ ppm = 7.31 – 7.19 (m, 2H), 7.14 (dd, *J* = 5.1, 1.9 Hz, 2H), 7.00 (dd, *J* = 6.7, 2.9 Hz, 1H), 5.03 (s, 1H), 4.66 – 4.53 (m, 1H), 3.77 (d, *J* = 5.0 Hz, 3H), 3.66 – 3.55 (m, 1H), 3.52 – 3.41 (m, 1H), 2.38 – 2.21 (m, 1H), 2.04 – 1.77 (m, 3H), 1.27 (s, 9H). LCMS (ESI): *m/z* = 457 [M + H]<sup>+</sup>.

**Supplementary Scheme 3. Synthesis of (S)-methyl 6-oxo-5-(pivaloyloxy)-2-(pyrrolidin-2-yl)-1,6-dihydropyrimidine-4-carboxylate hydrochloride**

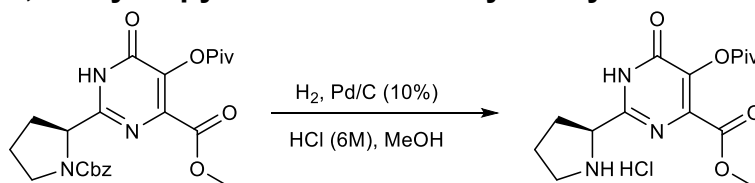

**(S)-methyl 6-oxo-5-(pivaloyloxy)-2-(pyrrolidin-2-yl)-1,6-dihydropyrimidine-4-carboxylate hydrochloride.** To a solution of (S)-methyl 2-(1-((benzyloxy)carbonyl)pyrrolidin-2-yl)-6-oxo-5-(pivaloyloxy)-1,6-dihydropyrimidine-4-carboxylate (1.5 g, 3.2 mmol, 1 eq.) in methanol (10 mL) was added 10% wetted Pd/C (0.34 g, 1 eq.) and 6M HCl (0.54 mL, 1 eq.). The reaction mixture was placed under a balloon of H<sub>2</sub> and stirred at room temperature for 2 h. The reaction mixture was then diluted with methanol and ethyl acetate and filtered through a pad of celite. The filtrate was concentrated *in vacuo* to obtain a red oil (1.0 g, 96%). <sup>1</sup>H NMR (400 MHz, Methanol-*d*<sub>4</sub>): δ ppm = 4.68 (d, *J* = 7.9 Hz, 1H), 3.93 (s, 3H), 3.58 (td, *J* = 11.3, 10.5, 5.4 Hz, 1H), 3.45 (dt, *J* = 11.2, 6.7 Hz, 1H), 2.57 (d, *J* = 7.3 Hz, 1H), 2.17 (t, *J* = 3.4 Hz, 3H), 1.38 (s, 9H). LCMS (ESI): *m/z* = 323 [M + H]<sup>+</sup>.

**Supplementary Scheme 4. General Procedure for Synthesis of Library compounds: Part 1.**

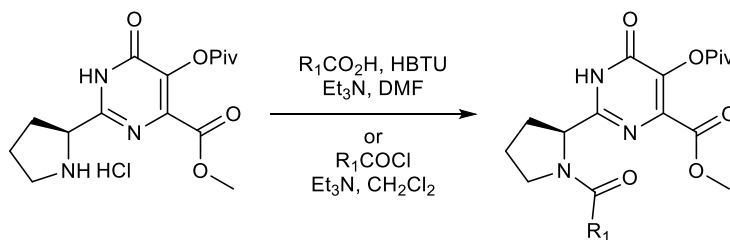

To a mixture of carboxylic acid (1 eq.) in dry DMF (1 mL) at room temperature was added triethylamine (2 eq.), followed by HBTU (1.1 eq.) and amine (1.1 eq.), OR to amine (1 eq.) in dry DCM (1 mL) was added acid chloride (1 eq.) followed by triethylamine (3 eq.). Once the reaction was complete, quenched with aqueous NH<sub>4</sub>Cl and diluted with ethyl acetate. The organic layer was washed with water and brine, dried over MgSO<sub>4</sub>, filtered, and concentrated. The crude product was used directly in the next step.

## Supplementary Scheme 5. General Procedure for Synthesis of Library compounds: Part II.

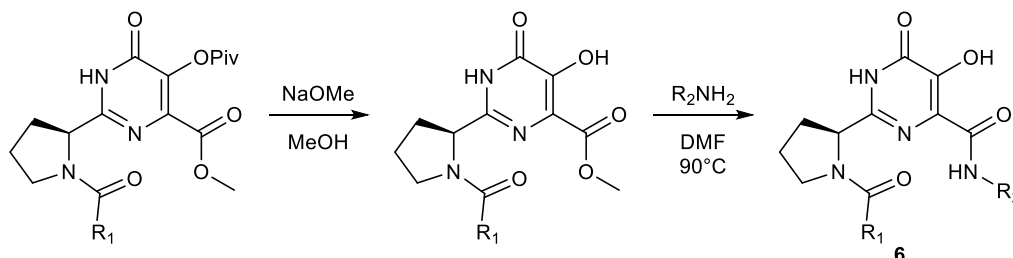

To the crude product in MeOH (0.5 M) was added NaOMe (2 eq., 25 wt % solution) dropwise. The reaction stirred at room temperature overnight. When the reaction was complete, it was quenched with a few drops of  $\text{NH}_4\text{Cl}$  and concentrated. The crude product was purified by reverse phase chromatography (MeOH/water + 0.1% formic acid).

To the ester (1 eq.) in dry DMF (0.2 M) was added the amine (3 eq.). This mixture was heated to  $90^\circ\text{C}$  overnight. Once the reaction was complete, it was cooled to room temperature and purified by reverse phase column directly (MeOH/water + 0.1% formic acid).

## Supplementary Scheme 6. Synthesis of Carboxylate Analogs

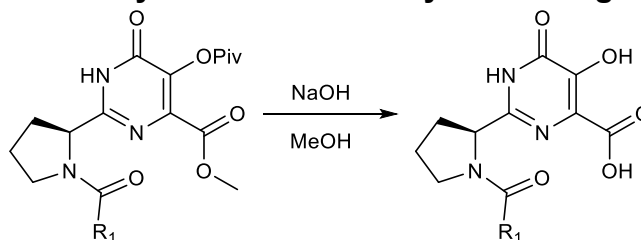

The crude intermediate was dissolved in MeOH (0.5 mL) and 2M sodium hydroxide solution (8 eq.) was added at room temperature. The reaction mixture was then stirred at  $60^\circ\text{C}$  for 3-5 h. After cooling to room temperature, the reaction mixture was concentrated to remove methanol. The pH of the reaction mixture was adjusted to 2 using 10% aqueous HCl solution. Purification was achieved using automated reversed-phase flash chromatography (MeCN/water + 1% formic acid).

### Library Compounds:

**(S)-5-hydroxy-2-(1-(2-(naphthalen-1-yloxy)acetyl)pyrrolidin-2-yl)-6-oxo-1,6-dihydropyrimidine-4-carboxylic acid (6b):**  $^1\text{H}$  NMR (400 MHz,  $\text{DMSO}-d_6$ ):  $\delta$  ppm = 8.30 – 8.12 (m, 1H), 7.97 – 7.79 (m, 1H), 7.59 – 7.41 (m, 2H), 7.36 (t,  $J$  = 8.0 Hz, 1H), 6.92 (d,  $J$  = 7.7 Hz, 1H), 5.14 – 4.87 (m, 2H), 4.79 (dd,  $J$  = 8.1, 5.0 Hz, 1H), 3.84 (q,  $J$  = 7.5 Hz, 1H), 3.65 (q,  $J$  = 7.7, 7.2 Hz, 1H), 2.33 – 2.16 (m, 1H), 2.16 – 2.03 (m, 1H), 1.95 (tq,  $J$  = 11.4, 5.8 Hz, 1H). LCMS (ESI):  $m/z$  = 410  $[\text{M} + \text{H}]^+$ .

**(S)-2-(1-(2-(4-chlorophenyl)acetyl)pyrrolidin-2-yl)-5-hydroxy-6-oxo-1,6-dihydropyrimidine-4-carboxylic acid (6c):**  $^1\text{H}$  NMR (400 MHz,  $\text{DMSO}-d_6$ ):  $\delta$  ppm = 7.37-7.32 (m, 2H), 7.32-7.25 (m, 2H), 4.74 (dd,  $J$  = 8.3, 4.4 Hz, 1H), 3.80 – 3.53 (m, 4H), 2.19 (dt,  $J$  = 8.7, 4.0 Hz, 1H), 2.07-1.96 (m, 1H), 1.91 (dq,  $J$  = 10.3, 5.5 Hz, 2H), 1.12 (s, 1H). LCMS (ESI):  $m/z$  = 378  $[\text{M} + \text{H}]^+$ .

**(S)-5-hydroxy-6-oxo-2-(1-(2-phenoxyacetyl)pyrrolidin-2-yl)-1,6-dihydropyrimidine-4-carboxylic acid (6d):** <sup>1</sup>H NMR (400 MHz, Methanol-*d*<sub>4</sub>): δ ppm = δ 7.15 (t, *J* = 7.9 Hz, 2H), 6.89 – 6.77 (m, 2H), 4.71 (s, 2H), 3.78 (s, 1H), 3.64 – 3.47 (m, 1H), 2.21 (t, *J* = 7.1 Hz, 1H), 2.17 – 2.04 (m, 1H), 2.04 – 1.90 (m, 2H). LCMS (ESI): *m/z* = 360 [M + H]<sup>+</sup>.

**(S)-5-hydroxy-N-(2-methoxyethyl)-6-oxo-2-(1-(2-phenoxyacetyl)pyrrolidin-2-yl)-1,6-dihydropyrimidine-4-carboxamide (6e):** <sup>1</sup>H NMR (400 MHz, Chloroform-*d*): δ ppm = 12.23 (br s, 1H), 7.95 – 7.85 (m, 1H), 7.26 (d, *J* = 1.1 Hz, 2H), 7.03 – 6.84 (m, 3H), 5.04 (dd, *J* = 7.7, 3.6 Hz, 1H), 4.86 – 4.74 (m, 2H), 4.00 – 3.89 (m, 1H), 3.73 – 3.48 (m, 5H), 3.40 (s, 3H), 2.45 – 2.32 (m, 1H), 2.26 – 1.99 (m, 3H). LCMS (ESI): *m/z* = 417 [M + H]<sup>+</sup>.

**(S)-2-(1-(2,6-dichlorobenzoyl)pyrrolidin-2-yl)-5-hydroxy-6-oxo-N-phenethyl-1,6-dihydropyrimidine-4-carboxamide (7a):** <sup>1</sup>H NMR (400 MHz, Chloroform-*d*): δ ppm = 12.29 (s, 1H), 11.07 (s, 1H), 7.53 – 7.46 (m, 1H), 7.37 - 7.25 (m, 5H), 7.25 - 7.16 (m, 2H), 5.19 (dd, *J* = 8.0, 2.6 Hz, 1H), 3.72 - 3.64 (m, 2H), 3.28 - 3.19 (m, 2H), 2.91 (t, *J* = 6.8 Hz, 2H), 2.56 - 2.45 (m, 1H), 2.15 - 2.08 (m, 1H), 1.96 - 1.91 (m, 2H). LCMS (ESI): *m/z* = 501 [M + H]<sup>+</sup>. Melting point: 222-224° C.

**(S)-2-(1-(2,6-difluorobenzoyl)pyrrolidin-2-yl)-5-hydroxy-6-oxo-N-phenethyl-1,6-dihydropyrimidine-4-carboxamide (7b):** <sup>1</sup>H NMR (400 MHz, Chloroform-*d*): δ ppm = 12.27 (s, 1H), 11.86 (s, 1H), 7.63 (t, *J* = 6.3 Hz, 1H), 7.37 (ddd, *J* = 14.0, 8.0, 6.1 Hz, 1H), 7.31 - 7.16 (m, 11H), 6.93 (dt, *J* = 18.7, 8.1 Hz, 2H), 5.13 (dd, *J* = 7.7, 4.3 Hz, 1H), 3.78 - 3.59 (m, 2H), 3.48 - 3.32 (m, 2H), 2.91 (t, *J* = 7.0 Hz, 2H), 2.35 – 2.25 (m, *J* = 5.9, 5.3 Hz, 2H), 2.0 - 1.92 (m, *J* = 2H). LCMS (ESI): *m/z* = 469 [M + H]<sup>+</sup>. Melting point: 241-243° C.

**(S)-2-(1-(3,5-dichloroisonicotinoyl)pyrrolidin-2-yl)-5-hydroxy-6-oxo-N-phenethyl-1,6-dihydropyrimidine-4-carboxamide (7c):** <sup>1</sup>H NMR (400 MHz, Chloroform-*d*): δ ppm = 12.37 (s, 1H), 8.57 (d, *J* = 5.3 Hz, 2H), 7.50 (t, *J* = 6.8 Hz, 1H), 7.36 – 7.28 (m, 2H), 7.28 – 7.20 (m, 3H), 5.20 (dd, *J* = 8.1, 2.9 Hz, 1H), 3.81 – 3.62 (m, 2H), 3.26 (t, *J* = 6.9 Hz, 2H), 2.98 – 2.88 (m, 2H), 2.55 – 2.42 (m, 1H), 2.23 – 2.10 (m, 1H), 2.05 – 1.93 (m, 2H). LCMS (ESI): *m/z* = 502 [M + H]<sup>+</sup>. Melting point: 242-244° C.

**(S)-2-(1-(2,5-dichloroisonicotinoyl)pyrrolidin-2-yl)-5-hydroxy-6-oxo-N-phenethyl-1,6-dihydropyrimidine-4-carboxamide (7d):** <sup>1</sup>H NMR (400 MHz, DMSO-*d*<sub>6</sub>): δ ppm = 12.82 (br s, 1H), 12.40 (br s, 1H), 8.67 – 8.07 (m, 2H), 7.69 (s, 1H), 7.38 – 7.08 (m, 4H), 4.84 – 4.29 (m, 1H), 3.57 – 3.37 (m, 4H), 2.94 – 2.61 (m, 2H), 2.34 – 2.13 (m, 1H), 2.10 – 1.75 (m, 3H). LCMS (ESI): *m/z* = 502 [M + H]<sup>+</sup>.

**(S)-2-(1-(2-chloroisonicotinoyl)pyrrolidin-2-yl)-5-hydroxy-6-oxo-N-phenethyl-1,6-dihydropyrimidine-4-carboxamide (7e):** <sup>1</sup>H NMR (400 MHz, DMSO-*d*<sub>6</sub>): δ ppm = 12.57 (br, 2H), 8.81 – 8.18 (m, 2H), 7.80 – 7.43 (m, 1H), 7.43 – 7.02 (m, 5H), 4.96 – 4.37 (m, 1H), 3.86 – 3.67 (m, 1H), 3.64 – 3.33 (m, 3H), 2.94 – 2.73 (m, 2H), 2.34 – 2.15 (m, 1H), 2.04 – 1.67 (m, 3H). LCMS (ESI): *m/z* = 468 [M + H]<sup>+</sup>.

**(S)-2-(1-(3,5-dichloroisonicotinoyl)pyrrolidin-2-yl)-5-hydroxy-6-oxo-N-(3-(trifluoromethyl)benzyl)-1,6-dihydropyrimidine-4-carboxamide (8a):** <sup>1</sup>H NMR (400 MHz, Chloroform-*d*) δ ppm = 12.21 (s, 1H), 11.44 (br s, 1H), 8.55 (d, *J* = 14.7 Hz, 2H), 7.90 (t, *J* = 6.4 Hz, 1H), 7.63 – 7.47 (m, 4H), 5.21 (dd, *J* = 8.0, 3.8 Hz, 1H), 4.77 – 4.61 (m, 2H), 3.48 – 3.37 (m, 1H), 3.35 – 3.25 (m, 1H), 2.60 – 2.48 (m, 1H), 2.39 – 2.24 (m, 1H), 2.21 – 1.96 (m, 2H). LCMS (ESI): *m/z* = 556 [M + H]<sup>+</sup>. Melting point: 236-238° C.

**(S)-2-(1-(3,5-dichloroisonicotinoyl)pyrrolidin-2-yl)-5-hydroxy-1-methyl-6-oxo-N-phenethyl-1,6-dihydropyrimidine-4-carboxamide (8b):** <sup>1</sup>H NMR (400 MHz, Chloroform-*d*) δ ppm = 12.09 (s, 1H), 8.57 (d, *J* = 11.4 Hz, 2H), 7.45 (br s, 1H), 7.26 – 7.25 (m, 1H), 7.24 – 7.15 (m, 3H), 7.12 – 7.06 (m, 1H), 5.32 (dd, *J* = 8.4, 2.6 Hz, 1H), 4.07 – 3.93 (m, 1H), 3.72 (s, 3H), 3.56 – 3.42 (m, 1H), 3.24 – 3.10 (m, 1H), 3.04 – 2.79 (m, 3H), 2.46 – 2.27 (m, 1H), 2.11 – 1.87 (m, 3H). LCMS (ESI): *m/z* = 516 [M + H]<sup>+</sup>. Melting point: 105-108° C.

**(S)-2-(1-(3,5-dichloroisonicotinoyl)pyrrolidin-2-yl)-5-hydroxy-6-oxo-N-(3-(trifluoromethyl)phenethyl)-1,6-dihydropyrimidine-4-carboxamide (8c):** <sup>1</sup>H NMR (400 MHz, Chloroform-*d*) δ ppm = 12.28 (s, 1H), 8.60 – 8.55 (m, 2H), 7.54 – 7.48 (m, 2H), 7.48 – 7.43 (m, 2H), 5.19 (dd, *J* = 8.1, 3.2 Hz, 1H), 3.82 – 3.65 (m, 2H), 3.33 – 3.24 (m, 2H), 3.05 – 2.97 (m, 2H), 2.53 – 2.41 (m, 1H), 2.28 – 2.15 (m, 1H), 2.00 (p, *J* = 6.9 Hz, 2H). LCMS (ESI): *m/z* = 570 [M + H]<sup>+</sup>. Melting point: 235-238° C.

**(S)-2-(1-(3,5-dichloroisonicotinoyl)pyrrolidin-2-yl)-5-hydroxy-6-oxo-N-(2-phenoxyethyl)-1,6-dihydropyrimidine-4-carboxamide (8d):** <sup>1</sup>H NMR (400 MHz, Chloroform-*d*) δ ppm = 12.27 (s, 1H), 11.26 (br s, 1H), 8.57 (s, 1H), 8.49 (s, 1H), 7.99 (t, *J* = 6.1 Hz, 1H), 7.32 – 7.27 (m, 2H), 7.01 – 6.94 (m, 1H), 6.92 – 6.87 (m, 2H), 5.23 (dd, *J* = 7.9, 3.1 Hz, 1H), 4.16 (t, *J* = 5.1 Hz, 2H), 3.94 – 3.75 (m, 2H), 3.41 – 3.23 (m, 2H), 2.69 – 2.57 (m, 1H), 2.35 – 2.12 (m, 2H), 2.12 – 1.97 (m, 1H). LCMS (ESI): *m/z* = 518 [M + H]<sup>+</sup>. Melting point: 234-236° C.

**(S)-2-(1-(3,5-dichloroisonicotinoyl)pyrrolidin-2-yl)-5-hydroxy-6-oxo-N-(2-(phenylsulfonyl)ethyl)-1,6-dihydropyrimidine-4-carboxamide (8e):** <sup>1</sup>H NMR (400 MHz, Chloroform-*d*) δ ppm = 11.97 (s, 1H), 8.58 (s, 2H), 7.99 – 7.87 (m, 2H), 7.77 – 7.66 (m, 1H), 7.61 (t, *J* = 7.6 Hz, 2H), 5.29 (dd, *J* = 7.7, 1.9 Hz, 1H), 3.89 (p, *J* = 5.2 Hz, 2H), 3.44 – 3.24 (m, 4H), 2.99 – 2.86 (m, 1H), 2.38 – 2.04 (m, 3H). LCMS (ESI): *m/z* = 566 [M + H]<sup>+</sup>. Melting point: 150-153° C.

**(S)-2-(1-(3,5-dichloroisonicotinoyl)pyrrolidin-2-yl)-N-(2,3-dihydro-1H-inden-2-yl)-5-hydroxy-6-oxo-1,6-dihydropyrimidine-4-carboxamide (8f):** <sup>1</sup>H NMR (400 MHz, Chloroform-*d*) δ ppm = 12.40 (s, 1H), 11.11 (br s, 1H), 8.56 (d, *J* = 7.2 Hz, 2H), 7.67 (d, *J* = 8.1 Hz, 1H), 7.32 – 7.18 (m, 4H), 5.17 (dd, *J* = 8.0, 3.7 Hz, 1H), 4.93 – 4.78 (m, 1H), 3.43 (dd, *J* = 16.2, 7.4 Hz, 2H), 3.39 – 3.24 (m, 2H), 2.95 (dt, *J* = 16.4, 4.8 Hz, 2H), 2.55 – 2.39 (m, 1H), 2.34 – 2.19 (m, 1H), 2.13 – 1.94 (m, 2H). LCMS (ESI): *m/z* = 514 [M + H]<sup>+</sup>. Melting point: 155-158° C.

**(S)-2-(1-(3,5-dichloroisonicotinoyl)pyrrolidin-2-yl)-N-(2,3-dihydro-1H-inden-2-yl)-5-hydroxy-1-methyl-6-oxo-1,6-dihydropyrimidine-4-carboxamide (8g):** <sup>1</sup>H NMR (400 MHz, Chloroform-*d*) δ ppm = 12.03 (s, 1H), 8.56 (s, 1H), 8.50 (s, 1H), 7.66 (d, *J* = 8.6 Hz, 1H), 7.26 – 7.19 (m, 2H), 7.18 – 7.08 (m, 2H), 5.34 (dd, *J* = 8.4, 2.9 Hz, 1H), 4.94 – 4.76 (m, 1H), 3.74 (s, 3H), 3.39 (dt, *J* = 15.1, 7.0 Hz, 2H), 3.29 – 3.18 (m, 1H), 3.08 – 3.00 (m, 1H), 2.93 (dd, *J* = 16.1, 4.3 Hz, 1H), 2.84 (dd, *J* = 16.1, 4.3 Hz, 1H), 2.42 – 2.30 (m, 1H), 2.14 – 1.91 (m, 3H). LCMS (ESI): *m/z* = 528 [M + H]<sup>+</sup>. Melting point: 140-143° C.

**(S)-2-(1-(3,5-dichloroisonicotinoyl)pyrrolidin-2-yl)-N-((2,3-dihydro-1H-inden-2-yl)methyl)-5-hydroxy-6-oxo-1,6-dihydropyrimidine-4-carboxamide (8h):** <sup>1</sup>H NMR (400 MHz, Chloroform-*d*) δ ppm = 12.42 (s, 1H), 11.08 (br s, 1H), 8.58 (d, *J* = 5.1 Hz, 2H), 7.66 – 7.57 (m, 1H), 7.25 – 7.19 (m, 2H), 7.18 – 7.12 (m, 2H), 5.28 – 5.18 (m, 1H), 3.63 – 3.47 (m, 2H), 3.43 – 3.26 (m, 2H), 3.14 (dd, *J* = 15.1, 7.2 Hz, 2H), 2.89 – 2.69 (m, 3H), 2.59 (s, 1H), 2.36 – 2.22 (m, 1H), 2.19 – 1.99 (m, 2H). LCMS (ESI): *m/z* = 528 [M + H]<sup>+</sup>. Melting point: 230-233° C.

**(S)-2-(1-(3-(2-chlorophenyl)propanoyl)pyrrolidin-2-yl)-5-hydroxy-6-oxo-N-phenethyl-1,6-dihydropyrimidine-4-carboxamide (9a):** <sup>1</sup>H NMR (400 MHz, Chloroform-*d*) δ ppm = 12.24 (s, 1H), 11.48 (br s, 1H), 7.50 – 7.42 (m, 1H), 7.37 – 7.30 (m, 3H), 7.29 – 7.22 (m, 3H), 7.21 – 7.11 (m, 2H), 4.99 (d, *J* = 6.8 Hz, 1H), 3.76 – 3.63 (m, 2H), 3.46 – 3.31 (m, 2H), 3.11 (t, *J* = 7.5 Hz, 2H), 2.92 (t, *J* = 6.8 Hz, 2H), 2.74 – 2.64 (m, 2H), 2.50 – 2.40 (m, 1H), 1.98 – 1.80 (m, 3H). LCMS (ESI): *m/z* = 495 [M + H]<sup>+</sup>. Melting point: 88-90° C.

**(S)-2-(1-(3-(2-chlorophenyl)propanoyl)pyrrolidin-2-yl)-5-hydroxy-6-oxo-N-(2-phenoxyethyl)-1,6-dihydropyrimidine-4-carboxamide (9b):** <sup>1</sup>H NMR (400 MHz, Chloroform-*d*) δ ppm = 12.14 (s, 1H), 11.49 (br s, 1H), 7.95 (t, *J* = 6.0 Hz, 1H), 7.35 – 7.27 (m, 4H), 7.16 (pd, *J* = 7.4, 1.8 Hz, 2H), 7.03 – 6.94 (m, 1H), 6.90 (dd, *J* = 8.8, 1.0 Hz, 2H), 5.04 (d, *J* = 7.3 Hz, 1H), 4.18 – 4.10 (m, 2H), 3.91 – 3.75 (m, 2H), 3.52 – 3.34 (m, 2H), 3.11 (t, *J* = 7.2 Hz, 2H), 2.71 – 2.62 (m, 3H), 2.13 – 1.89 (m, 3H). LCMS (ESI): *m/z* = 511 [M + H]<sup>+</sup>. Melting point: 140-143° C.

**(S)-2-(1-(3-(2-fluorophenyl)propanoyl)pyrrolidin-2-yl)-5-hydroxy-6-oxo-N-(2-phenoxyethyl)-1,6-dihydropyrimidine-4-carboxamide (9c):** <sup>1</sup>H NMR (400 MHz, Chloroform-*d*) δ ppm = 12.23 (s, 1H), 11.51 (s, 1H), 7.47 (t, *J* = 6.0 Hz, 1H), 7.36 – 7.30 (m, 2H), 7.28 – 7.21 (m, 4H), 7.21 – 7.14 (m, 1H), 7.08 – 6.95 (m, 2H), 4.98 (d, *J* = 6.1 Hz, 1H), 3.69 (qd, *J* = 6.6, 4.1 Hz, 2H), 3.50 – 3.42 (m, 1H), 3.41 – 3.33 (m, 1H), 3.01 (t, *J* = 7.7 Hz, 2H), 2.92 (t, *J* = 6.7 Hz, 2H), 2.64 (t, *J* = 7.6 Hz, 2H), 2.47 – 2.39 (m, 1H), 1.99 – 1.82 (m, 3H). LCMS (ESI): *m/z* = 479 [M + H]<sup>+</sup>. Melting point: 140-143° C.

**(S)-2-(1-(3-(2-fluorophenyl)propanoyl)pyrrolidin-2-yl)-5-hydroxy-6-oxo-N-(2-phenoxyethyl)-1,6-dihydropyrimidine-4-carboxamide (9d):** <sup>1</sup>H NMR (400 MHz, Chloroform-*d*) δ ppm = 12.14 (br s, 1H), 11.47 (br s, 1H), 7.96 (t, *J* = 5.8 Hz, 1H), 7.33 –



7.27 (m, 2H), 7.25 – 7.14 (m, 2H), 7.08 – 7.02 (m, 1H), 7.02 – 6.95 (m, 2H), 6.94 – 6.83 (m, 2H), 5.04 (d,  $J = 7.5$  Hz, 1H), 4.15 (t,  $J = 5.2$  Hz, 2H), 3.89 – 3.78 (m, 2H), 3.52 – 3.33 (m, 2H), 3.02 (t,  $J = 7.6$  Hz, 2H), 2.71 – 2.60 (m, 3H), 2.12 – 1.89 (m, 3H). LCMS (ESI):  $m/z = 495$   $[M + H]^+$ . Melting point: 154-157° C.

**(S)-2-(1-(2-(2-chlorophenoxy)acetyl)pyrrolidin-2-yl)-5-hydroxy-6-oxo-N-phenethyl-1,6-dihydropyrimidine-4-carboxamide (9e):**  $^1\text{H}$  NMR (400 MHz, Chloroform- $d$ )  $\delta$  ppm = 12.17 (br s, 1H), 7.63 (t,  $J = 6.2$  Hz, 1H), 7.36 – 7.28 (m, 3H), 7.27 – 7.18 (m, 3H), 7.14 (t,  $J = 7.0$  Hz, 1H), 6.96 – 6.83 (m, 2H), 4.92 (dd,  $J = 8.6, 3.6$  Hz, 1H), 4.87 (s, 2H), 4.05 – 3.94 (m, 1H), 3.75 – 3.59 (m, 3H), 2.90 (t,  $J = 7.1$  Hz, 2H), 2.28 – 2.18 (m, 1H), 2.12 – 1.97 (m, 3H). LCMS (ESI):  $m/z = 497$   $[M + H]^+$ . Melting point: 116-118° C.

**(S)-2-(1-(2-(2-chlorophenoxy)acetyl)pyrrolidin-2-yl)-5-hydroxy-6-oxo-N-(2-phenoxyethyl)-1,6-dihydropyrimidine-4-carboxamide (9f):**  $^1\text{H}$  NMR (400 MHz, Chloroform- $d$ )  $\delta$  ppm = 12.12 (s, 1H), 11.98 (br s, 1H), 7.99 (t,  $J = 5.7$  Hz, 1H), 7.36 – 7.28 (m, 3H), 7.20 – 7.12 (m, 1H), 7.02 – 6.96 (m, 1H), 6.96 – 6.86 (m, 4H), 5.01 (dd,  $J = 7.8, 3.6$  Hz, 1H), 4.92 – 4.82 (m, 2H), 4.15 (t,  $J = 5.1$  Hz, 2H), 4.03 – 3.94 (m, 1H), 3.89 – 3.69 (m, 3H), 2.40 – 2.28 (m, 1H), 2.26 – 2.00 (m, 3H). LCMS (ESI):  $m/z = 513$   $[M + H]^+$ . Melting point: 166-168° C.

**(S)-2-(1-(2-(2-fluorophenoxy)acetyl)pyrrolidin-2-yl)-5-hydroxy-6-oxo-N-phenethyl-1,6-dihydropyrimidine-4-carboxamide (9g):**  $^1\text{H}$  NMR (400 MHz, Chloroform- $d$ )  $\delta$  ppm = 12.21 (s, 1H), 12.00 (br s, 1H), 7.58 (t,  $J = 6.1$  Hz, 1H), 7.36 – 7.30 (m, 2H), 7.29 – 7.21 (m, 4H), 7.10 – 6.88 (m, 3H), 4.97 (dd,  $J = 7.8, 3.8$  Hz, 1H), 4.84 (s, 2H), 3.95 – 3.81 (m, 1H), 3.74 – 3.61 (m, 3H), 2.92 (t,  $J = 7.0$  Hz, 2H), 2.27 – 2.09 (m, 2H), 2.07 – 1.95 (m, 2H). LCMS (ESI):  $m/z = 481$   $[M + H]^+$ . Melting point: 148-151° C.

**(S)-2-(1-(2-(2-fluorophenoxy)acetyl)pyrrolidin-2-yl)-5-hydroxy-6-oxo-N-(2-phenoxyethyl)-1,6-dihydropyrimidine-4-carboxamide (9h):**  $^1\text{H}$  NMR (400 MHz, Chloroform- $d$ )  $\delta$  ppm = 12.11 (s, 1H), 11.95 (br s, 1H), 8.03 – 7.95 (m, 1H), 7.33 – 7.27 (m, 2H), 7.08 – 6.95 (m, 4H), 6.95 – 6.85 (m, 3H), 5.02 (dd,  $J = 7.8, 3.6$  Hz, 1H), 4.84 (d,  $J = 2.0$  Hz, 2H), 4.15 (t,  $J = 5.2$  Hz, 2H), 3.96 – 3.90 (m, 1H), 3.88 – 3.63 (m, 3H), 2.41 – 2.30 (m, 1H), 2.26 – 2.00 (m, 3H). LCMS (ESI):  $m/z = 497$   $[M + H]^+$ . Melting point: 125-128° C.

**(S)-2-(1-(2-((2-chlorophenyl)thio)acetyl)pyrrolidin-2-yl)-5-hydroxy-6-oxo-N-phenethyl-1,6-dihydropyrimidine-4-carboxamide (9i):**  $^1\text{H}$  NMR (400 MHz, Chloroform- $d$ )  $\delta$  ppm = 12.21 (s, 1H), 11.71 (br s, 1H), 7.57 – 7.50 (m, 2H), 7.37 – 7.30 (m, 3H), 7.28 – 7.15 (m, 5H), 4.91 (dd,  $J = 7.8, 2.9$  Hz, 1H), 3.89 – 3.74 (m, 3H), 3.73 – 3.61 (m, 3H), 2.91 (t,  $J = 6.9$  Hz, 2H), 2.35 – 2.21 (m, 1H), 2.14 – 1.93 (m, 3H). LCMS (ESI):  $m/z = 513$   $[M + H]^+$ . Melting point: 110-113° C.

**2-((2S)-1-(2-((2-chlorophenyl)sulfinyl)acetyl)pyrrolidin-2-yl)-5-hydroxy-6-oxo-N-phenethyl-1,6-dihydropyrimidine-4-carboxamide (9j):**  $^1\text{H}$  NMR (400 MHz, Chloroform- $d$ )  $\delta$  ppm = 12.23 (s, 1H), 11.69 (br s, 1H), 7.95 – 7.83 (m, 1H), 7.74 (s, 1H), 7.59 – 7.36 (m, 3H), 7.35 – 7.28 (m, 2H), 7.28 – 7.17 (m, 3H), 4.96 (dd,  $J = 8.0, 2.9$  Hz,

1H), 4.41 (d,  $J = 13.2$  Hz, 1H), 4.06 – 3.92 (m, 1H), 3.90 – 3.79 (m, 1H), 3.74 – 3.56 (m, 3H), 2.93 (t,  $J = 7.1$  Hz, 2H), 2.31 – 2.10 (m, 1H), 2.08 – 1.89 (m, 3H). LCMS (ESI):  $m/z = 529$  [M + H]<sup>+</sup>. Melting point: 158-162° C.

**(S)-2-(1-(2-((2-chlorophenyl)thio)acetyl)pyrrolidin-2-yl)-5-hydroxy-6-oxo-N-(2-phenoxyethyl)-1,6-dihydropyrimidine-4-carboxamide (9k):** <sup>1</sup>H NMR (400 MHz, Chloroform-*d*)  $\delta$  ppm = 12.12 (s, 1H), 11.63 (br s, 1H), 7.97 (t,  $J = 5.6$  Hz, 1H), 7.54 (dd,  $J = 7.4, 1.8$  Hz, 1H), 7.38 – 7.28 (m, 3H), 7.25 – 7.14 (m, 2H), 6.99 (t,  $J = 7.4$  Hz, 1H), 6.94 – 6.88 (m, 2H), 5.02 – 4.90 (m, 1H), 4.15 (t,  $J = 5.1$  Hz, 2H), 3.93 – 3.76 (m, 5H), 3.76 – 3.62 (m, 1H), 2.54 – 2.42 (m, 1H), 2.23 – 2.01 (m, 3H). LCMS (ESI):  $m/z = 529$  [M + H]<sup>+</sup>. Melting point: 120-123° C.

**(S)-2-(1-(2-((2-fluorophenyl)thio)acetyl)pyrrolidin-2-yl)-5-hydroxy-6-oxo-N-phenethyl-1,6-dihydropyrimidine-4-carboxamide (9l):** <sup>1</sup>H NMR (400 MHz, Chloroform-*d*)  $\delta$  ppm = 12.22 (s, 1H), 11.49 (br s, 1H), 7.57 – 7.51 (m, 1H), 7.47 (td,  $J = 7.5, 1.7$  Hz, 1H), 7.34 (t,  $J = 7.1$  Hz, 2H), 7.30 – 7.21 (m, 4H), 7.12 – 7.02 (m, 2H), 4.90 (d,  $J = 6.1$  Hz, 1H), 3.87 – 3.56 (m, 6H), 2.92 (t,  $J = 6.9$  Hz, 2H), 2.39 – 2.27 (m, 1H), 2.10 – 1.93 (m, 3H). LCMS (ESI):  $m/z = 497$  [M + H]<sup>+</sup>. Melting point: 98-101° C.

**(S)-2-(1-(2-((2-fluorophenyl)thio)acetyl)pyrrolidin-2-yl)-5-hydroxy-6-oxo-N-(2-phenoxyethyl)-1,6-dihydropyrimidine-4-carboxamide (9m):** <sup>1</sup>H NMR (400 MHz, Chloroform-*d*)  $\delta$  ppm = 12.12 (s, 1H), 11.41 (s, 1H), 7.97 (t,  $J = 6.1$  Hz, 1H), 7.48 (td,  $J = 7.4, 1.6$  Hz, 1H), 7.34 – 7.26 (m, 3H), 7.11 – 7.02 (m, 2H), 7.02 – 6.96 (m, 1H), 6.95 – 6.87 (m, 2H), 4.98 – 4.92 (m, 1H), 4.15 (t,  $J = 5.2$  Hz, 2H), 3.90 – 3.77 (m, 2H), 3.76 – 3.60 (m, 3H), 2.60 – 2.48 (m, 1H), 2.20 – 2.02 (m, 3H). LCMS (ESI):  $m/z = 513$  [M + H]<sup>+</sup>. Melting point: 140-142° C.

**(S)-2-(1-(2-(2-chlorophenoxy)acetyl)pyrrolidin-2-yl)-5-hydroxy-6-oxo-N-(2-phenylthio)ethyl)-1,6-dihydropyrimidine-4-carboxamide (10a):** <sup>1</sup>H NMR (400 MHz, Chloroform-*d*)  $\delta$  ppm = 12.36 (br s, 1H), 12.06 (s, 1H), 7.97 (t,  $J = 5.6$  Hz, 1H), 7.44 – 7.36 (m, 2H), 7.34 – 7.27 (m, 3H), 7.25 – 7.19 (m, 1H), 7.19 – 7.10 (m, 1H), 6.97 – 6.84 (m, 2H), 4.99 (dd,  $J = 8.1, 4.1$  Hz, 1H), 4.90 (d,  $J = 5.1$  Hz, 2H), 4.12 – 4.00 (m, 1H), 3.83 – 3.69 (m, 1H), 3.60 (q,  $J = 6.4$  Hz, 2H), 3.14 (t,  $J = 6.6$  Hz, 2H), 2.34 – 2.02 (m, 4H). LCMS (ESI):  $m/z = 529$  [M + H]<sup>+</sup>. Melting point: 180-182° C.

**(S)-2-(1-(2-((2-chlorophenyl)thio)acetyl)pyrrolidin-2-yl)-5-hydroxy-6-oxo-N-(2-phenylthio)ethyl)-1,6-dihydropyrimidine-4-carboxamide (10b):** <sup>1</sup>H NMR (400 MHz, Chloroform-*d*)  $\delta$  ppm = 12.08 (s, 1H), 11.87 (br s, 1H), 7.96 (t,  $J = 6.2$  Hz, 1H), 7.54 (d,  $J = 7.5$  Hz, 1H), 7.43 – 7.37 (m, 2H), 7.38 – 7.27 (m, 3H), 7.25 – 7.13 (m, 3H), 4.96 (d,  $J = 6.7$  Hz, 1H), 4.04 – 3.77 (m, 1H), 3.72 (q,  $J = 8.0$  Hz, 1H), 3.60 (q,  $J = 6.4$  Hz, 2H), 3.14 (t,  $J = 6.5$  Hz, 2H), 2.48 – 2.32 (m, 1H), 2.25 – 2.05 (m, 3H). LCMS (ESI):  $m/z = 545$  [M + H]<sup>+</sup>. Melting point: 120-123° C.

**2-((S)-1-(2-(2-chlorophenoxy)acetyl)pyrrolidin-2-yl)-5-hydroxy-6-oxo-N-(2-phenylsulfinyl)ethyl)-1,6-dihydropyrimidine-4-carboxamide (10c):** <sup>1</sup>H NMR (400 MHz, Chloroform-*d*)  $\delta$  ppm = 11.97 (s, 1H), 8.54 (dt,  $J = 28.2, 5.8$  Hz, 1H), 7.67 – 7.45

(m, 4H), 7.34 (dd,  $J = 7.9, 1.6$  Hz, 1H), 7.19 – 7.10 (m, 1H), 6.99 – 6.85 (m, 2H), 5.08 – 4.99 (m, 1H), 4.96 – 4.81 (m, 2H), 4.04 – 3.96 (m, 1H), 3.95 – 3.84 (m, 1H), 3.82 – 3.65 (m, 2H), 3.31 – 3.17 (m, 1H), 2.97 – 2.87 (m, 1H), 2.47 – 2.35 (m, 1H), 2.29 – 2.00 (m, 3H). LCMS (ESI):  $m/z = 545$   $[M + H]^+$ . Melting point: 130-132° C.

**(S)-2-(1-(2-(2-chlorophenoxy)acetyl)pyrrolidin-2-yl)-5-hydroxy-6-oxo-N-(2-(phenylsulfonyl)ethyl)-1,6-dihydropyrimidine-4-carboxamide (10d):**  $^1\text{H}$  NMR (400 MHz, Chloroform- $d$ )  $\delta$  ppm = 11.81 (s, 1H), 8.49 (t,  $J = 5.6$  Hz, 1H), 7.91 (d,  $J = 7.7$  Hz, 2H), 7.68 (t,  $J = 7.2$  Hz, 1H), 7.58 (t,  $J = 7.6$  Hz, 2H), 7.35 (d,  $J = 7.9$  Hz, 1H), 7.22 – 7.12 (m, 1H), 6.98 – 6.88 (m, 2H), 5.12 – 5.01 (m, 1H), 4.88 (s, 2H), 4.08 – 3.80 (m, 3H), 3.78 – 3.67 (m, 1H), 3.47 – 3.28 (m, 2H), 2.50 – 2.32 (m, 1H), 2.30 – 2.07 (m, 3H). LCMS (ESI):  $m/z = 561$   $[M + H]^+$ . Melting point: 137-139° C.

**(S)-2-(1-(2-((2-chlorophenyl)thio)acetyl)pyrrolidin-2-yl)-5-hydroxy-6-oxo-N-(2-(phenylsulfonyl)ethyl)-1,6-dihydropyrimidine-4-carboxamide (10e):**  $^1\text{H}$  NMR (400 MHz, Chloroform- $d$ )  $\delta$  ppm = 11.83 (br s, 1H), 11.50 (br s, 1H), 8.51 (t,  $J = 6.1$  Hz, 1H), 7.92 (dt,  $J = 7.1, 1.5$  Hz, 2H), 7.69 (t,  $J = 7.5$  Hz, 1H), 7.59 (t,  $J = 7.5$  Hz, 1H), 7.53 (dd,  $J = 7.5, 1.9$  Hz, 1H), 7.37 (dd,  $J = 7.1, 2.3$  Hz, 1H), 7.25 – 7.15 (m, 2H), 5.00 (dd,  $J = 8.0, 2.6$  Hz, 1H), 3.94 – 3.77 (m, 5H), 3.73 – 3.62 (m, 1H), 3.36 (t,  $J = 5.7$  Hz, 2H), 2.67 – 2.57 (m, 1H), 2.34 – 2.21 (m, 1H), 2.19 – 2.06 (m, 2H). LCMS (ESI):  $m/z = 577$   $[M + H]^+$ .

**(S)-2-(1-(2-(2-chlorophenoxy)acetyl)pyrrolidin-2-yl)-5-hydroxy-N-(2-((4-methoxyphenyl)sulfonyl)ethyl)-6-oxo-1,6-dihydropyrimidine-4-carboxamide (10f):**  $^1\text{H}$  NMR (400 MHz, Chloroform- $d$ )  $\delta$  ppm = 11.86 (s, 1H), 8.53 (t,  $J = 5.9$  Hz, 1H), 7.82 (d,  $J = 8.9$  Hz, 2H), 7.36 (dd,  $J = 7.8, 1.6$  Hz, 1H), 7.20 – 7.14 (m, 1H), 7.02 (d,  $J = 9.0$  Hz, 2H), 6.97 – 6.89 (m, 2H), 5.07 (dd,  $J = 7.8, 2.4$  Hz, 1H), 4.85 (d,  $J = 4.0$  Hz, 2H), 3.96 – 3.80 (m, 3H), 3.87 (s, 3H), 3.79 – 3.65 (m, 1H), 3.32 (t,  $J = 5.8$  Hz, 2H), 2.58 – 2.46 (m, 1H), 2.33 – 2.06 (m, 3H). LCMS (ESI):  $m/z = 591$   $[M + H]^+$ . Melting point: 152-154° C.

**(S)-2-(1-(2-((2-chlorophenyl)thio)acetyl)pyrrolidin-2-yl)-5-hydroxy-N-(2-((4-methoxyphenyl)sulfonyl)ethyl)-6-oxo-1,6-dihydropyrimidine-4-carboxamide (10g):**  $^1\text{H}$  NMR (400 MHz, Chloroform- $d$ )  $\delta$  ppm = 11.87 (s, 1H), 11.35 (s, 1H), 8.53 (t,  $J = 5.8$  Hz, 1H), 7.83 (d,  $J = 8.8$  Hz, 2H), 7.56 – 7.50 (m, 1H), 7.40 – 7.34 (m, 1H), 7.24 – 7.17 (m, 2H), 7.03 (d,  $J = 8.9$  Hz, 2H), 5.00 (d,  $J = 7.9$  Hz, 1H), 3.88 (s, 3H), 3.87 – 3.81 (m, 2H), 3.81 – 3.77 (m, 2H), 3.67 (q,  $J = 9.1$  Hz, 1H), 3.32 (t,  $J = 5.6$  Hz, 2H), 2.75 – 2.60 (m, 1H), 2.36 – 2.22 (m, 1H), 2.20 – 2.03 (m, 2H). LCMS (ESI):  $m/z = 607$   $[M + H]^+$ . Melting point: 143-145° C.

**(S)-2-(1-(2-(2-chlorophenoxy)acetyl)pyrrolidin-2-yl)-N-(2,3-dihydro-1H-inden-2-yl)-5-hydroxy-6-oxo-1,6-dihydropyrimidine-4-carboxamide (10h):**  $^1\text{H}$  NMR (400 MHz, Chloroform- $d$ )  $\delta$  ppm = 12.27 (s, 2H), 7.78 (d,  $J = 8.8$  Hz, 1H), 7.32 (dd,  $J = 7.8, 1.5$  Hz, 1H), 7.30 – 7.19 (m, 4H), 7.19 – 7.13 (m, 1H), 6.92 (dtd,  $J = 14.3, 7.7, 1.3$  Hz, 2H), 4.96 (dd,  $J = 7.7, 4.6$  Hz, 1H), 4.91 – 4.75 (m, 3H), 3.99 (dt,  $J = 11.6, 6.1$  Hz, 1H), 3.81 – 3.67 (m, 1H), 3.41 (dd,  $J = 16.1, 7.4$  Hz, 2H), 2.95 (dt,  $J = 15.9, 6.5$  Hz, 2H), 2.29 – 2.13

(m, 2H), 2.10 – 1.97 (m, 2H). LCMS (ESI):  $m/z = 509 [M + H]^+$ . Melting point: 208-210° C.

**(S)-2-(1-(2-((2-chlorophenyl)thio)acetyl)pyrrolidin-2-yl)-N-(2,3-dihydro-1H-inden-2-yl)-5-hydroxy-6-oxo-1,6-dihydropyrimidine-4-carboxamide (10i):**  $^1\text{H NMR}$  (400 MHz, Chloroform-*d*)  $\delta$  ppm = 12.27 (br s, 1H), 12.21 (s, 1H), 7.74 (d,  $J = 8.0$  Hz, 1H), 7.56 – 7.47 (m, 1H), 7.32 (d,  $J = 7.7$  Hz, 1H), 7.28 – 7.09 (m, 4H), 4.92 – 4.75 (m, 2H), 4.17 – 3.80 (m, 3H), 3.80 – 3.62 (m, 1H), 3.46 – 3.34 (m, 2H), 3.02 – 2.86 (m, 2H), 2.30 – 2.09 (m, 2H), 2.04 (d,  $J = 7.4$  Hz, 2H). LCMS (ESI):  $m/z = 525 [M + H]^+$ . Melting point: 121-123° C.

**(S)-2-(1-(2-((2-chlorophenyl)thio)acetyl)pyrrolidin-2-yl)-N-(5,6-dimethoxy-2,3-dihydro-1H-inden-2-yl)-5-hydroxy-6-oxo-1,6-dihydropyrimidine-4-carboxamide (10j):**  $^1\text{H NMR}$  (400 MHz, Chloroform-*d*)  $\delta$  ppm = 12.25 (s, 1H), 12.02 (br s, 1H), 7.73 (d,  $J = 8.2$  Hz, 1H), 7.51 (d,  $J = 7.3$  Hz, 1H), 7.34 (dd,  $J = 7.6, 1.5$  Hz, 1H), 7.24 – 7.10 (m, 2H), 6.78 (d,  $J = 8.9$  Hz, 2H), 4.96 – 4.77 (m, 2H), 4.03 – 3.95 (m, 1H), 3.87 (d,  $J = 3.3$  Hz, 6H), 3.86 – 3.78 (m, 2H), 3.77 – 3.65 (m, 1H), 3.35 (dd,  $J = 15.8, 7.3$  Hz, 2H), 2.94 – 2.78 (m, 2H), 2.27 – 2.17 (m, 2H), 2.11 – 1.98 (m, 2H). LCMS (ESI):  $m/z = 585 [M + H]^+$ . Melting point: 139-141° C.

**2-((S)-1-(2-((2-chlorophenyl)thio)acetyl)pyrrolidin-2-yl)-N-((2,3-dihydrobenzofuran-2-yl)methyl)-5-hydroxy-6-oxo-1,6-dihydropyrimidine-4-carboxamide (10k):**  $^1\text{H NMR}$  (400 MHz, Chloroform-*d*)  $\delta$  ppm = 12.05 (s, 1H), 11.69 (s, 1H), 7.94 – 7.84 (m, 1H), 7.52 (t,  $J = 7.4$  Hz, 1H), 7.39 – 7.33 (m, 1H), 7.24 – 7.07 (m, 4H), 6.86 (tdd,  $J = 7.4, 3.6, 1.0$  Hz, 1H), 6.79 (dd,  $J = 8.0, 2.6$  Hz, 1H), 5.06 – 4.96 (m, 1H), 4.95 – 4.87 (m, 1H), 3.96 – 3.74 (m, 3H), 3.75 – 3.57 (m, 3H), 3.36 (dd,  $J = 15.7, 9.4$  Hz, 1H), 2.98 (ddd,  $J = 15.8, 7.2, 3.3$  Hz, 1H), 2.43 – 2.23 (m, 1H), 2.09 (s, 2H), 2.02 – 1.93 (m, 1H). LCMS (ESI):  $m/z = 541 [M + H]^+$ . Melting point: 115-118° C.

**(S)-N-(benzofuran-2-ylmethyl)-2-(1-(2-((2-chlorophenyl)thio)acetyl)pyrrolidin-2-yl)-5-hydroxy-6-oxo-1,6-dihydropyrimidine-4-carboxamide (10l):**  $^1\text{H NMR}$  (400 MHz, Chloroform-*d*)  $\delta$  ppm = 11.98 (s, 1H), 7.96 (t,  $J = 6.2$  Hz, 1H), 7.56 – 7.49 (m, 2H), 7.48 – 7.42 (m, 1H), 7.35 – 7.27 (m, 2H), 7.25 – 7.12 (m, 3H), 6.68 (d,  $J = 0.9$  Hz, 1H), 4.93 (dd,  $J = 8.0, 3.5$  Hz, 1H), 4.73 (d,  $J = 6.2$  Hz, 2H), 4.07 – 3.91 (m, 1H), 3.91 – 3.79 (m, 2H), 3.71 (q,  $J = 8.0$  Hz, 1H), 2.39 – 2.28 (m, 1H), 2.29 – 1.98 (m, 3H). LCMS (ESI):  $m/z = 539 [M + H]^+$ . Melting point: 132-134° C.

**(S)-2-(1-(2-(2-fluorophenoxy)acetyl)pyrrolidin-2-yl)-5-hydroxy-6-oxo-N-(2-(pyridin-2-yl)ethyl)-1,6-dihydropyrimidine-4-carboxamide (10m):**  $^1\text{H NMR}$  (400 MHz, Chloroform-*d*)  $\delta$  ppm = 12.13 (br s, 1H), 8.59 (d,  $J = 5.0$  Hz, 1H), 8.50 – 8.38 (m, 1H), 8.04 (s, 1H), 7.99 – 7.84 (m, 1H), 7.50 – 7.35 (m, 2H), 7.11 – 6.96 (m, 3H), 6.96 – 6.87 (m, 1H), 5.05 – 4.98 (m, 1H), 4.96 – 4.76 (m, 2H), 3.99 – 3.83 (m, 3H), 3.66 (q,  $J = 8.3$  Hz, 1H), 3.43 – 3.26 (m, 2H), 2.56 – 2.38 (m, 1H), 2.25 – 2.01 (m, 3H). LCMS (ESI):  $m/z = 482 [M + H]^+$ . Melting point: 138-140° C.



16384-1-Difluoro-Ph-Et-amine-CDCl3

Compound 7b

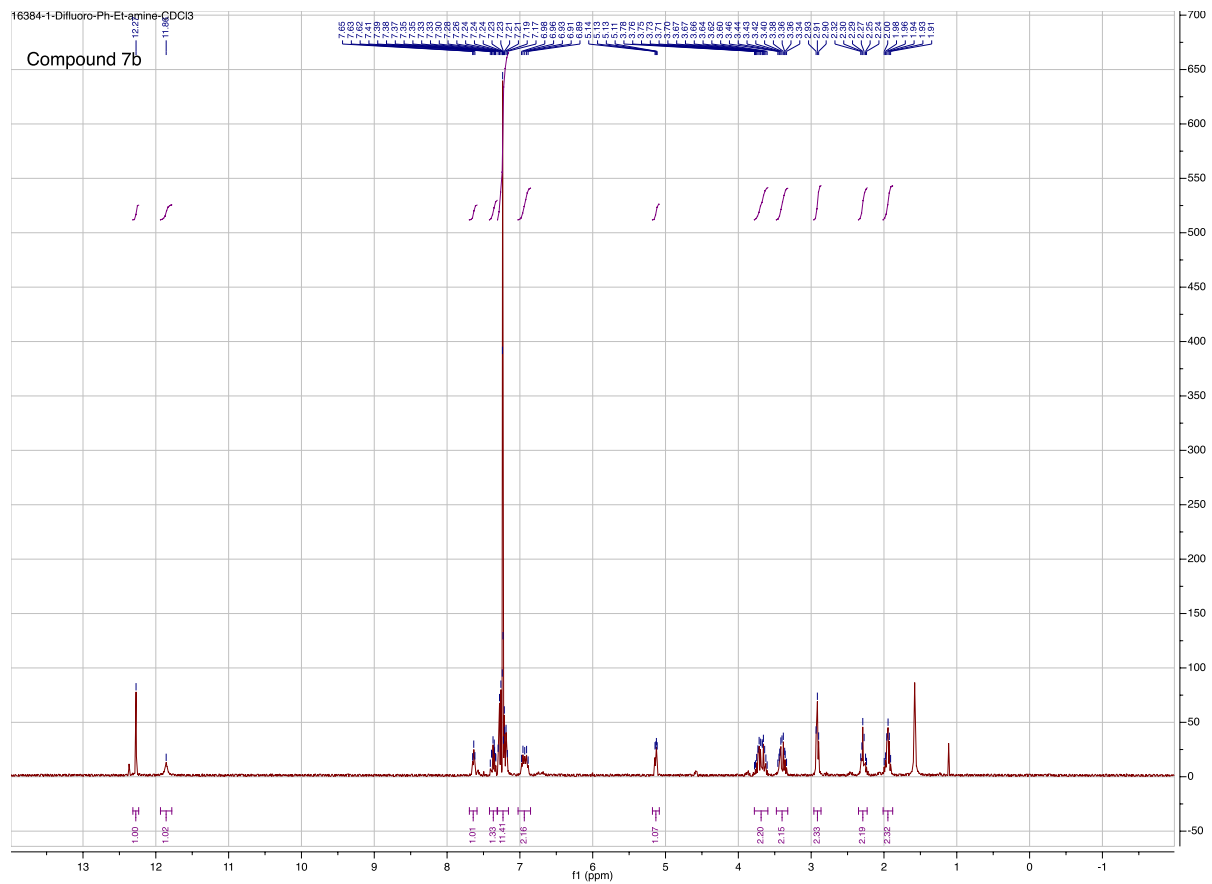

DJB-16453-77A

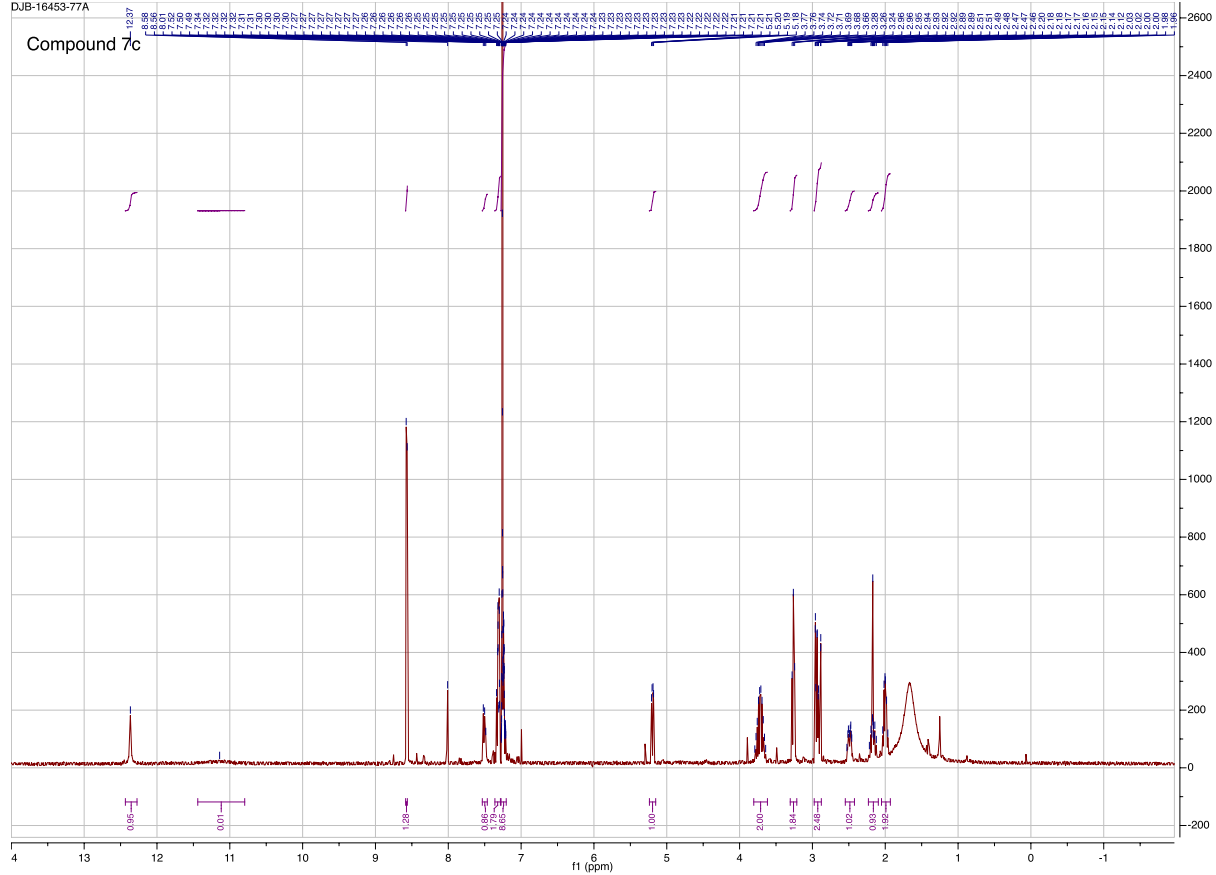

16436-JP-68-1-DMSO

Compound 7e

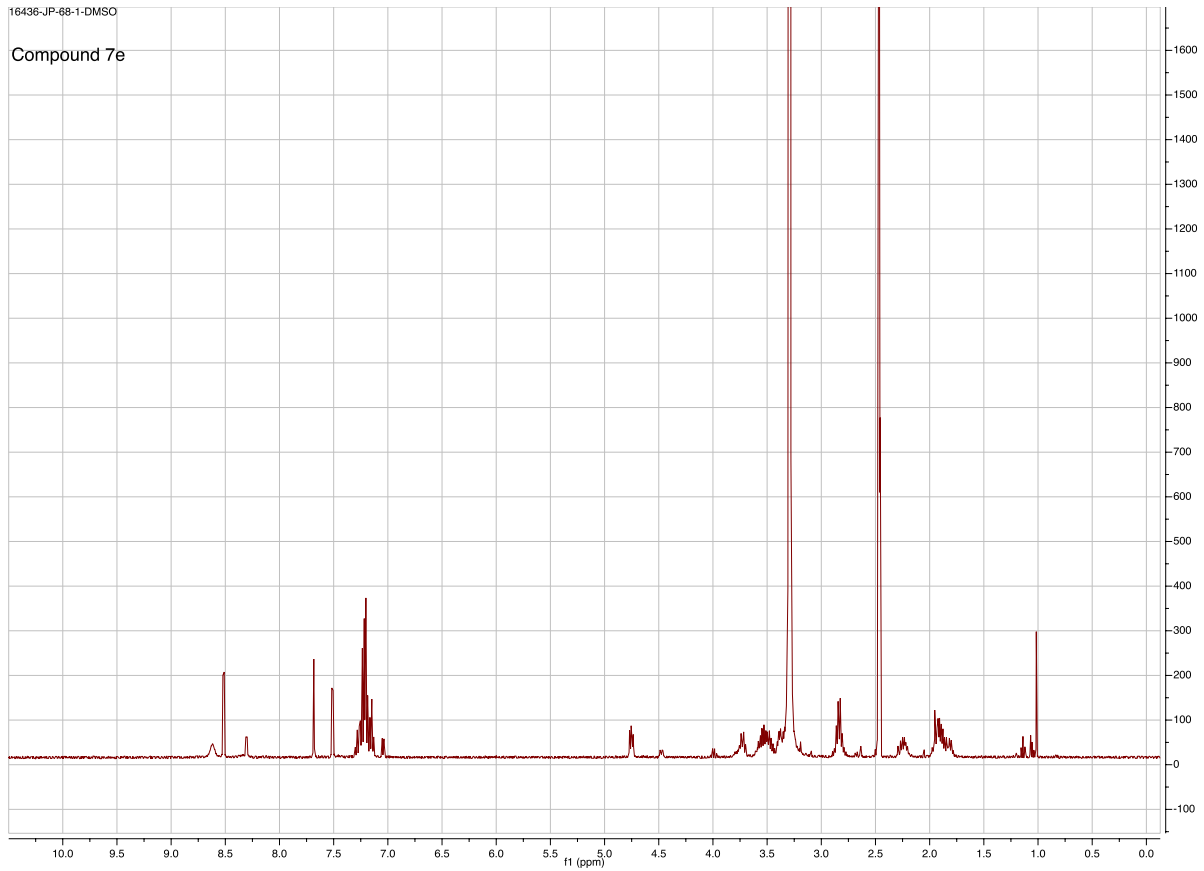



DJB-16453-78Cvac

Compound 8a

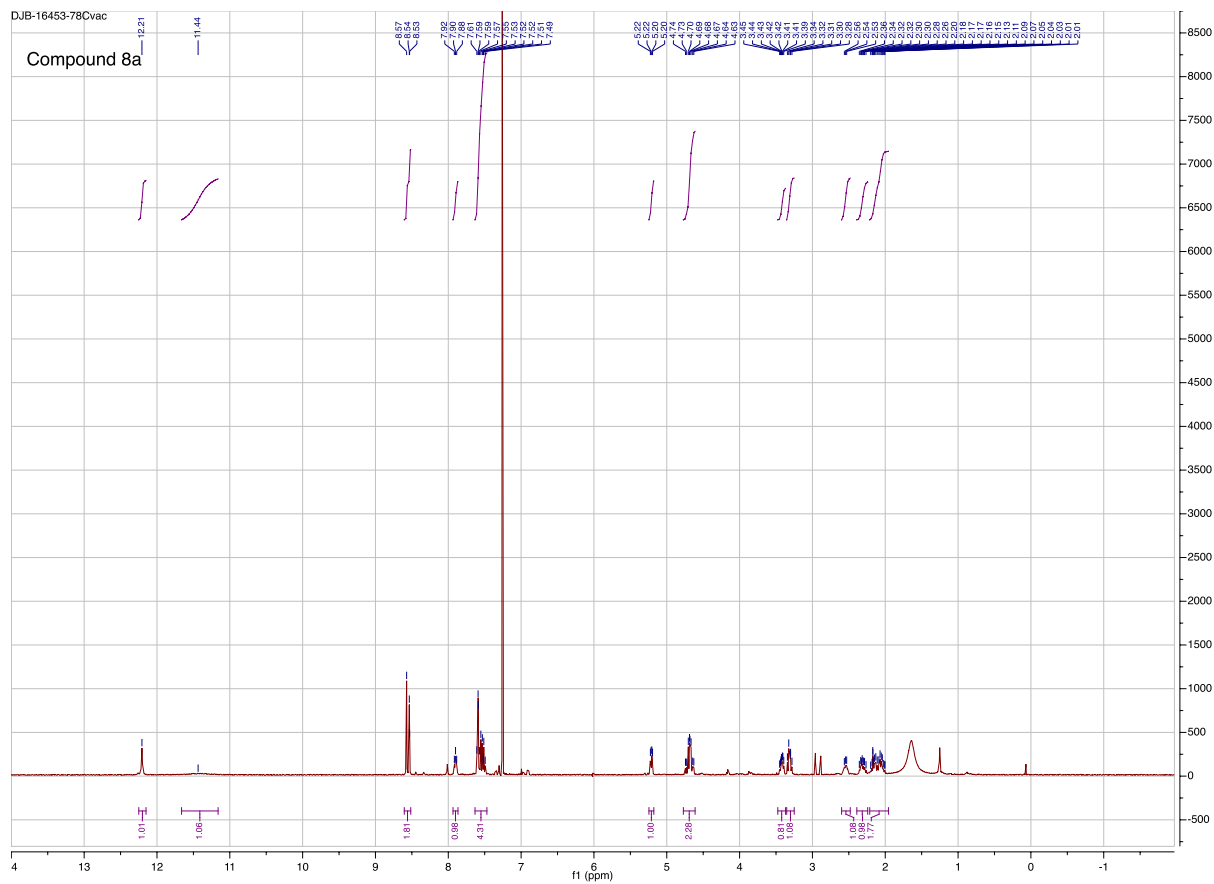

DJB-16453-77A

Compound 8b

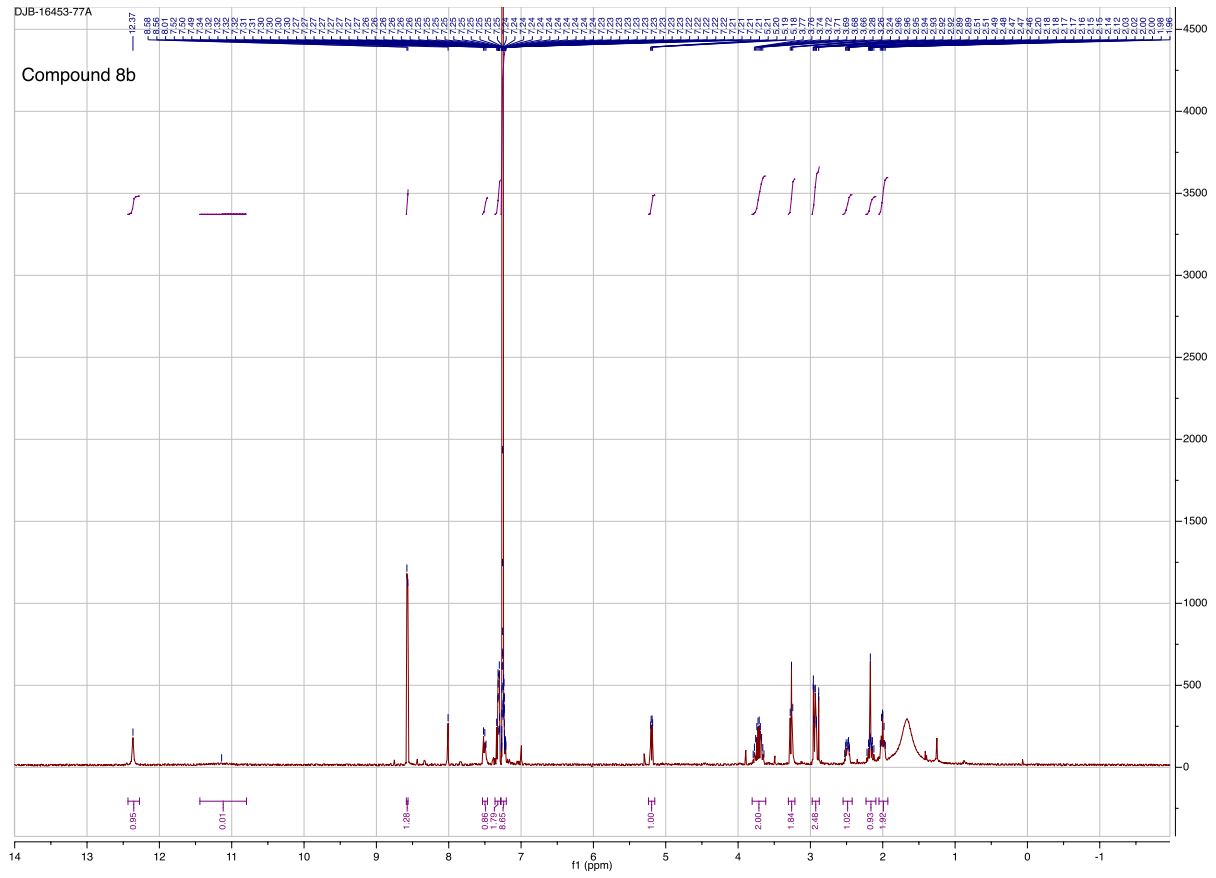

DJB-16453-77C

Compound 8C

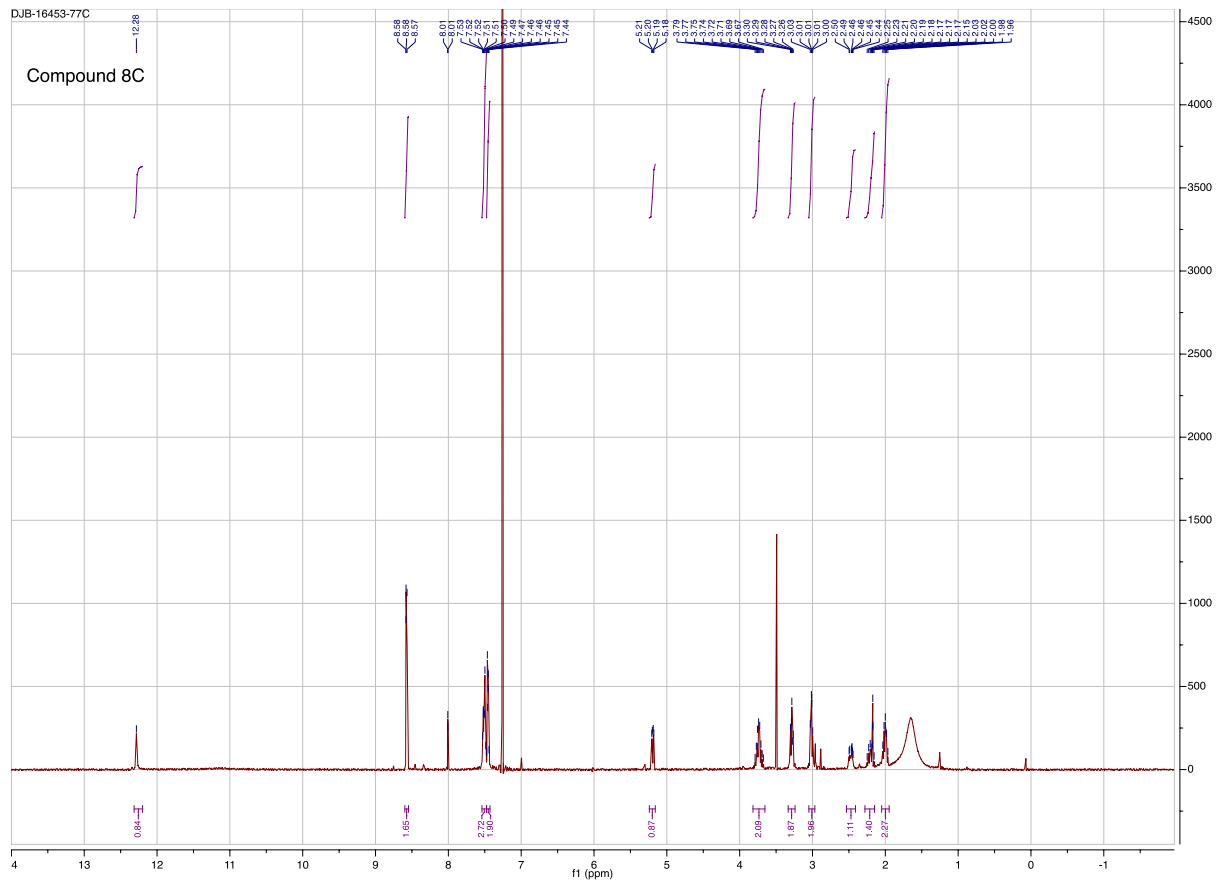

DJB-16453-77B

Compound 8D

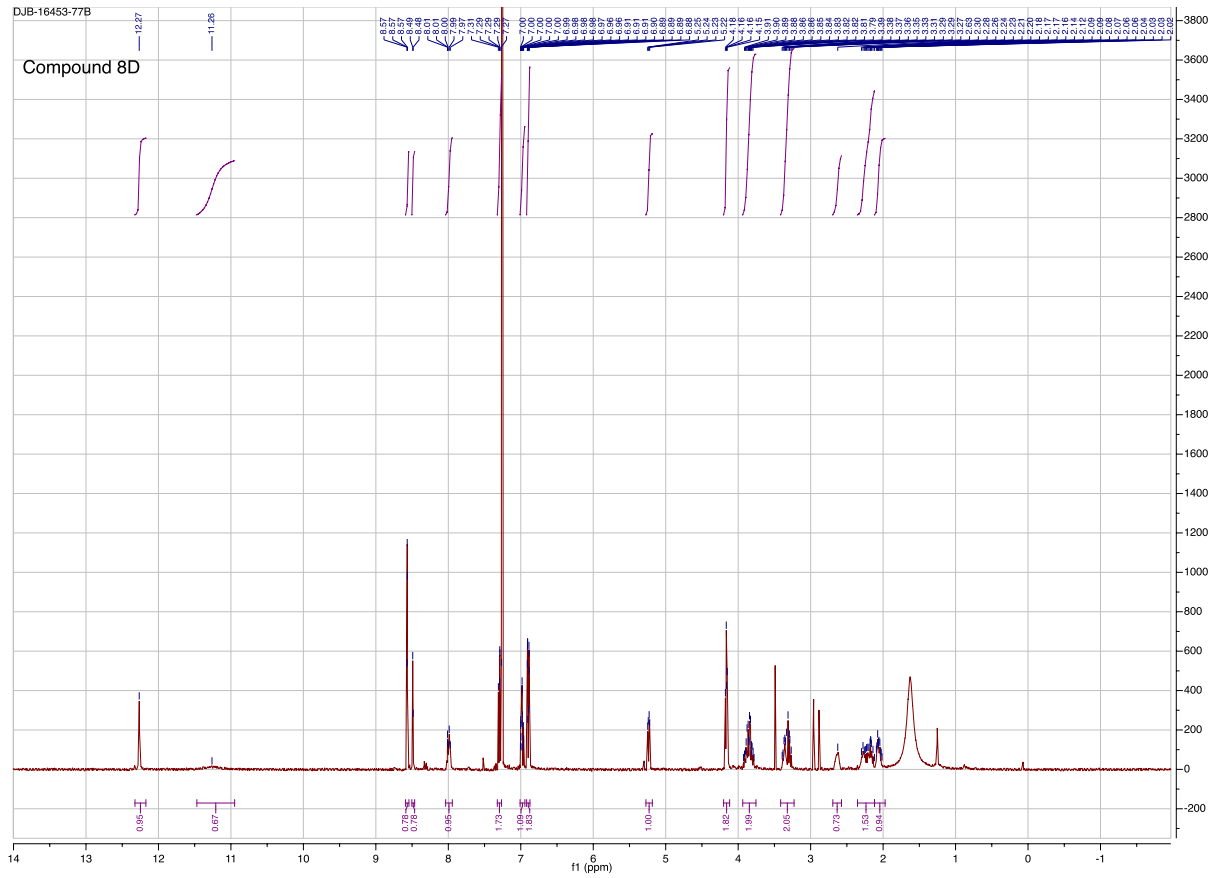

DJB-16494-61A

Compound 8e

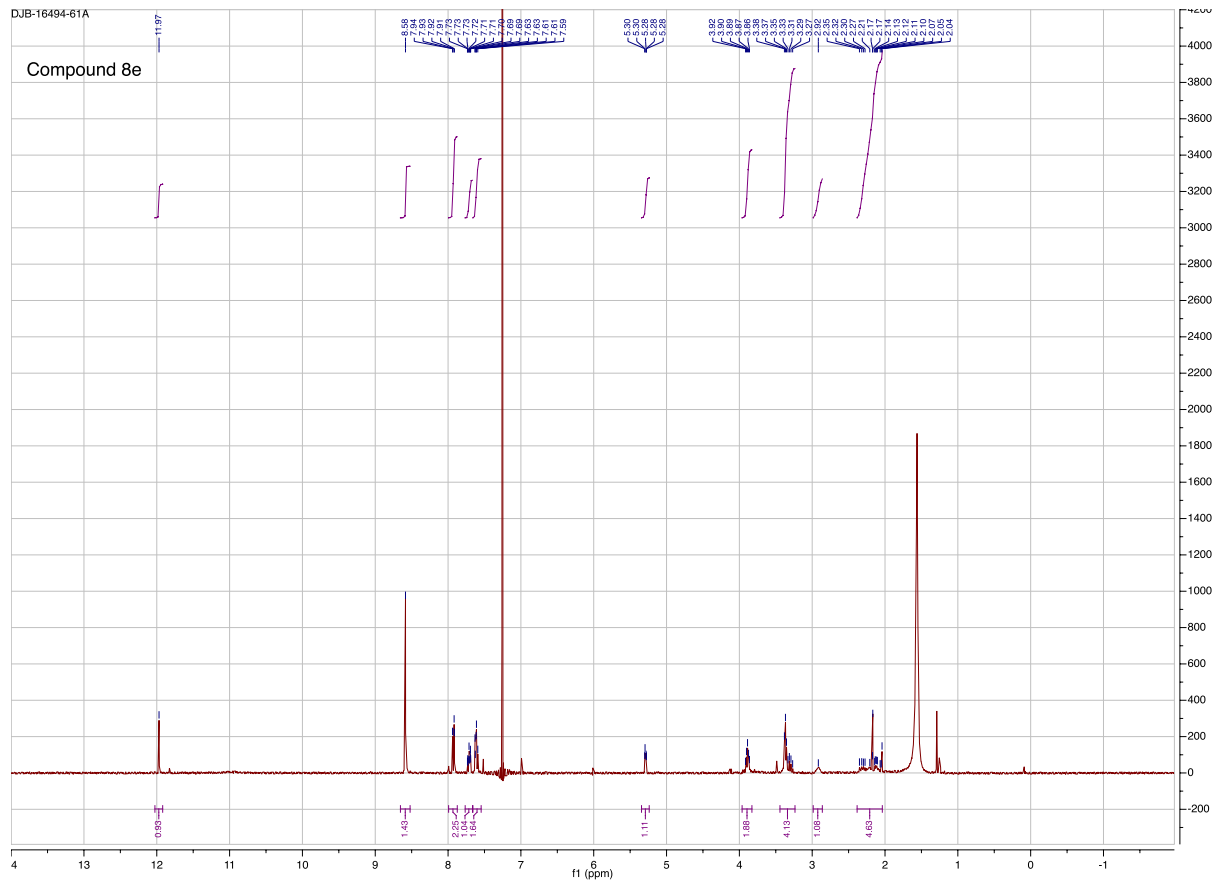



DJB-16540-02B

Compound 8g

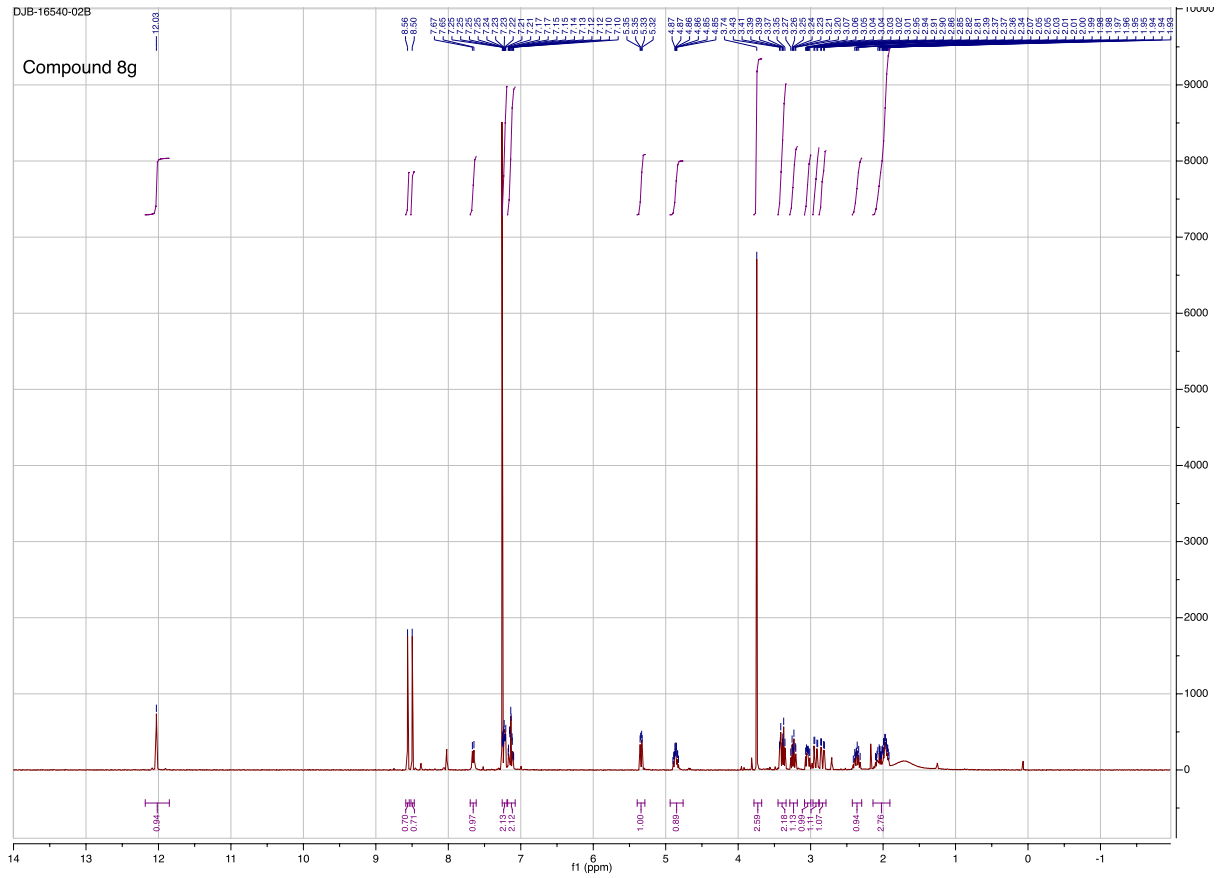

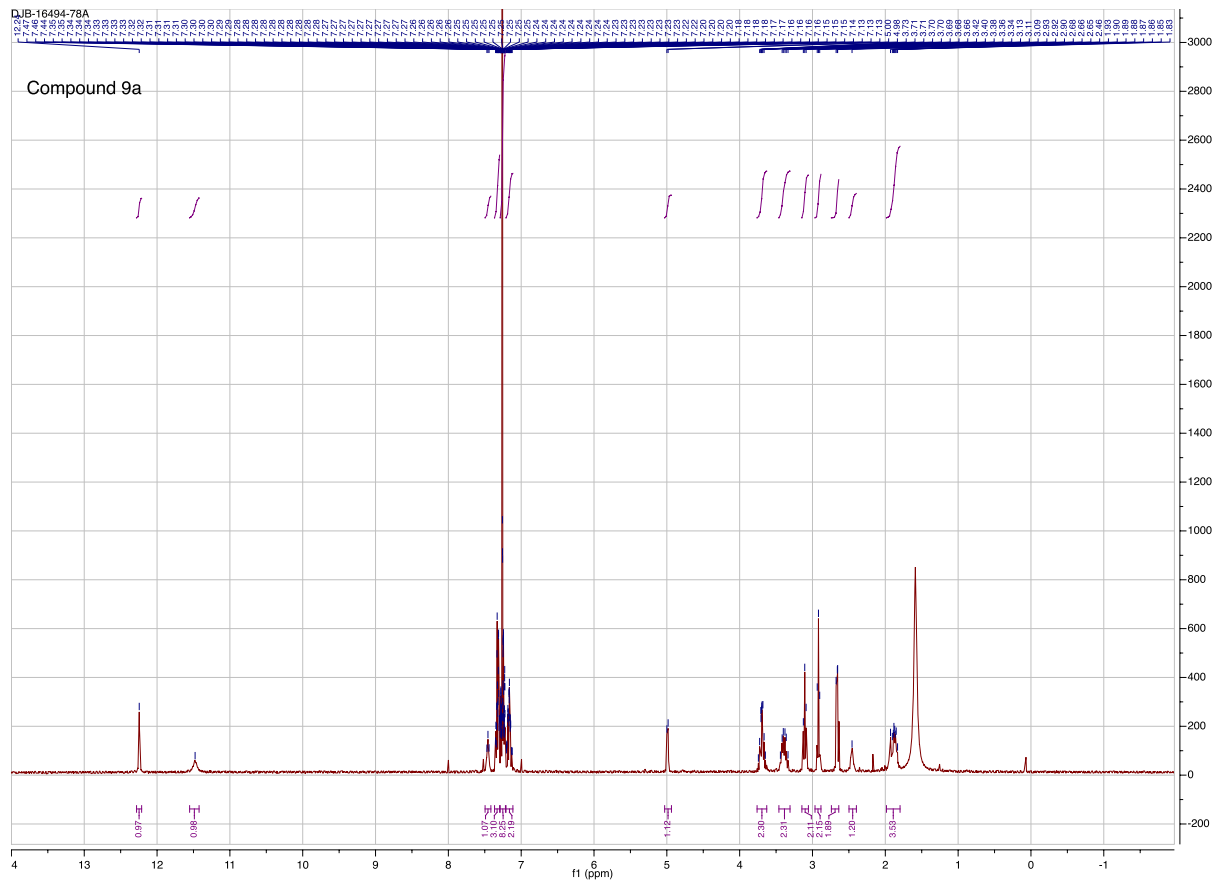



DJB-16540-10C

Compound 9b

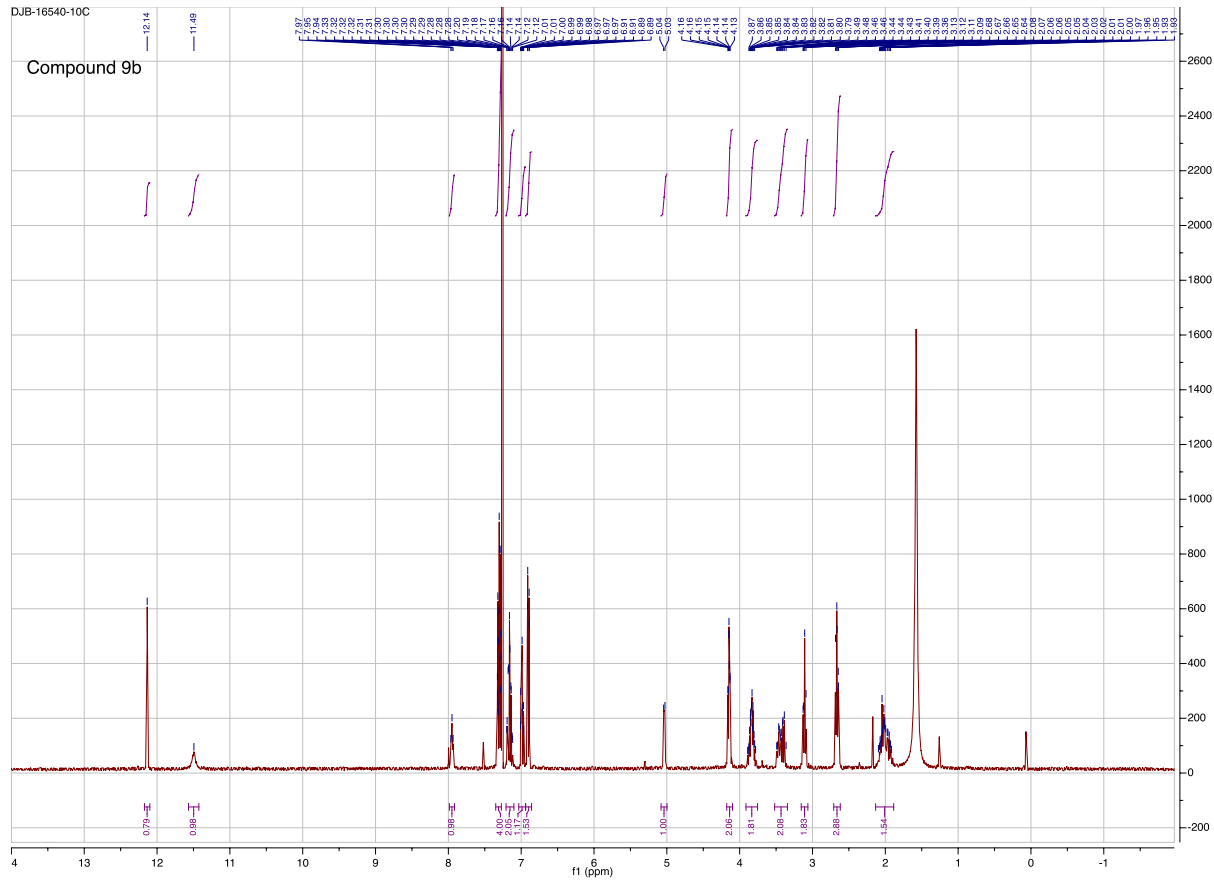

DJB-16453-45A

Compound 9c

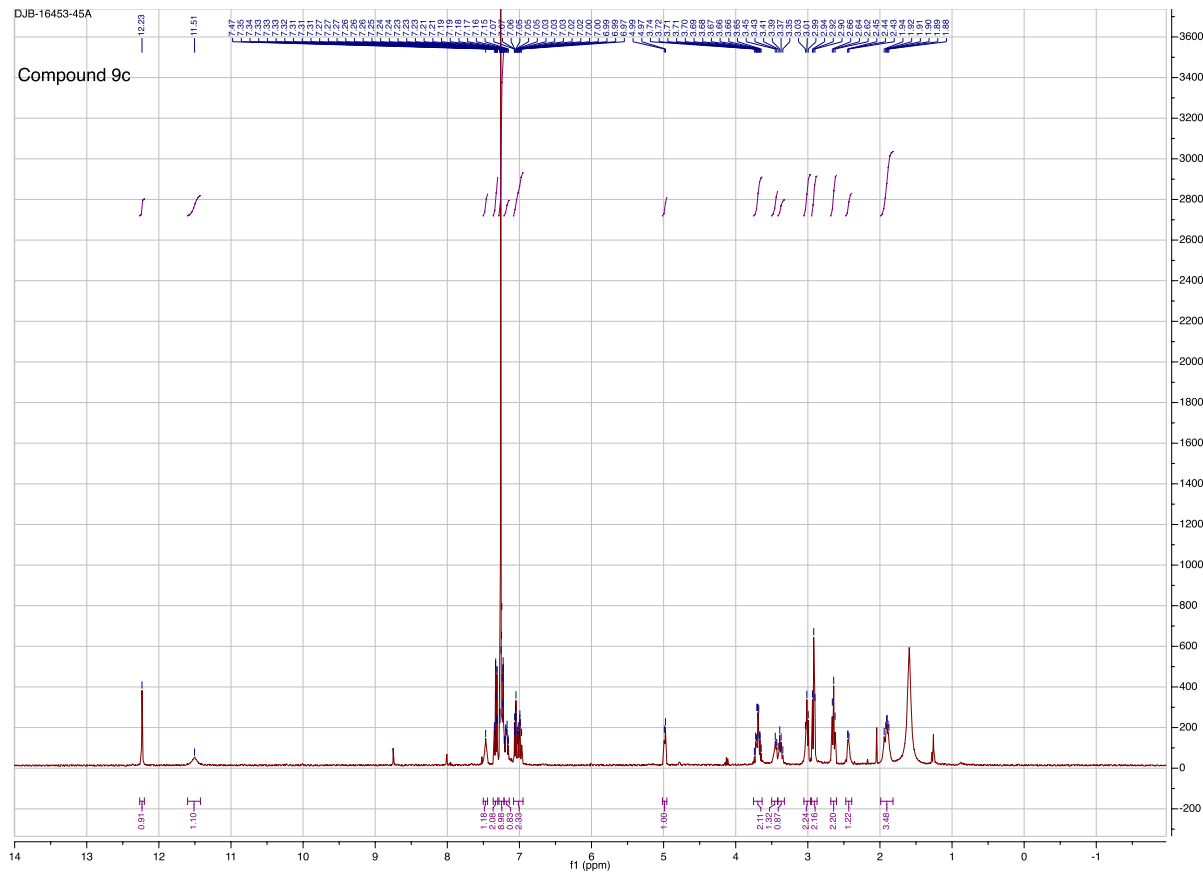

DJB-16453-45B

Compound 9d

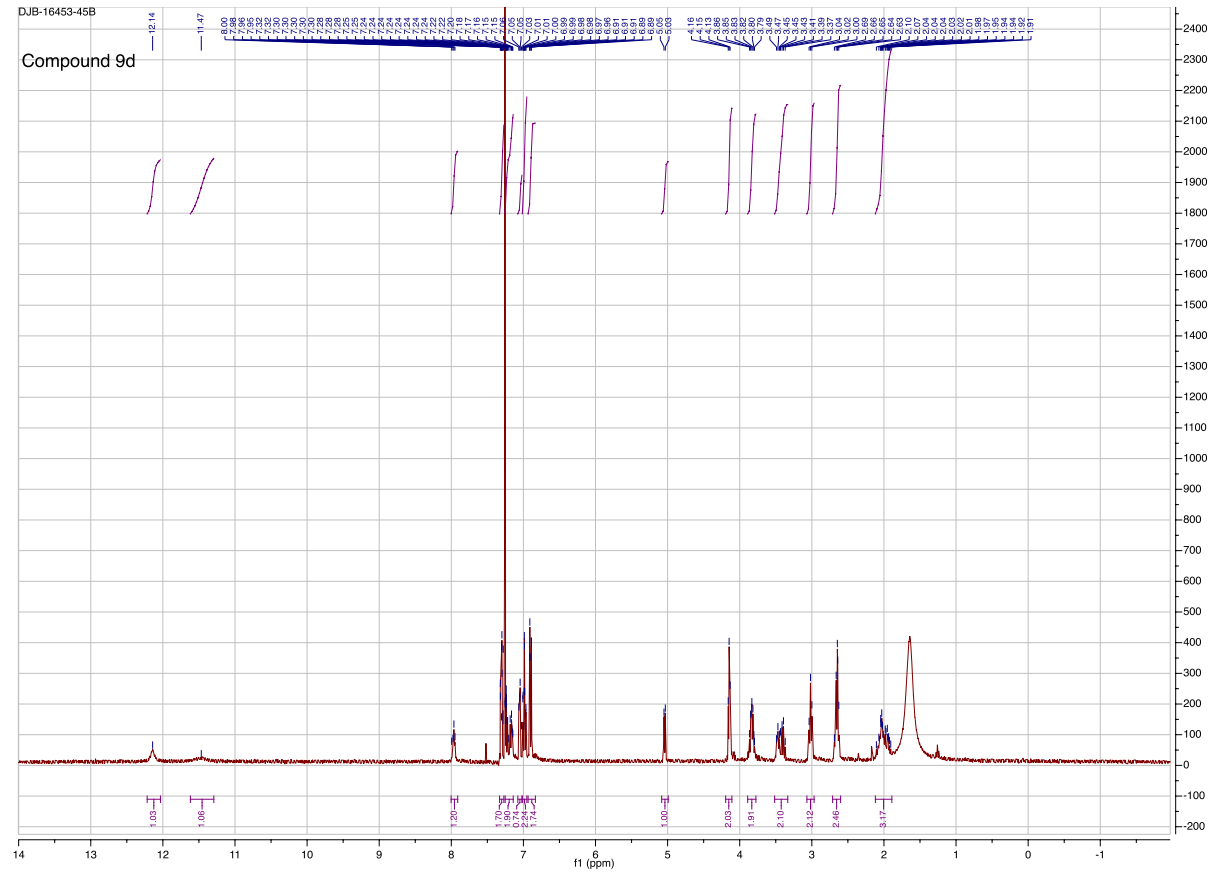

DJB-16453-28A-CDCl3

Compound 9f

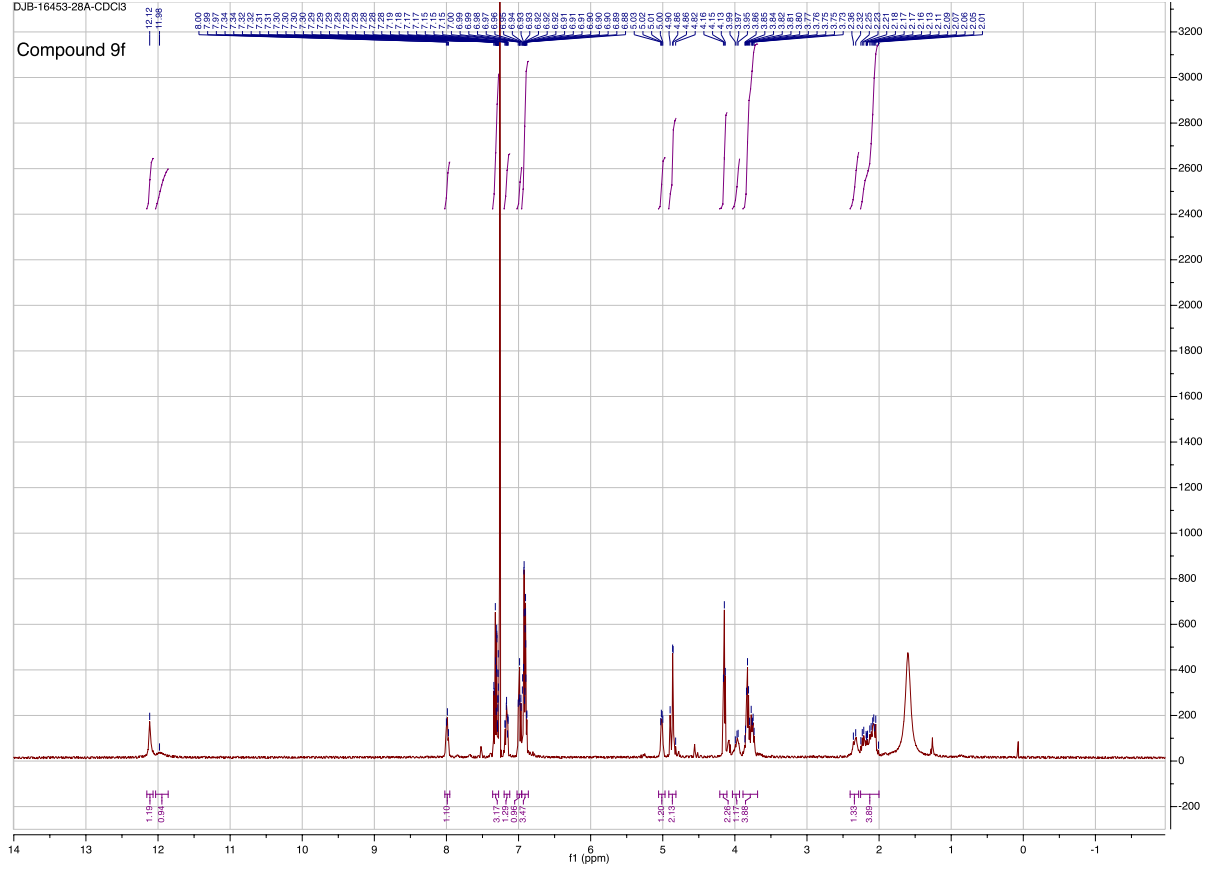

DJB-16494-02A

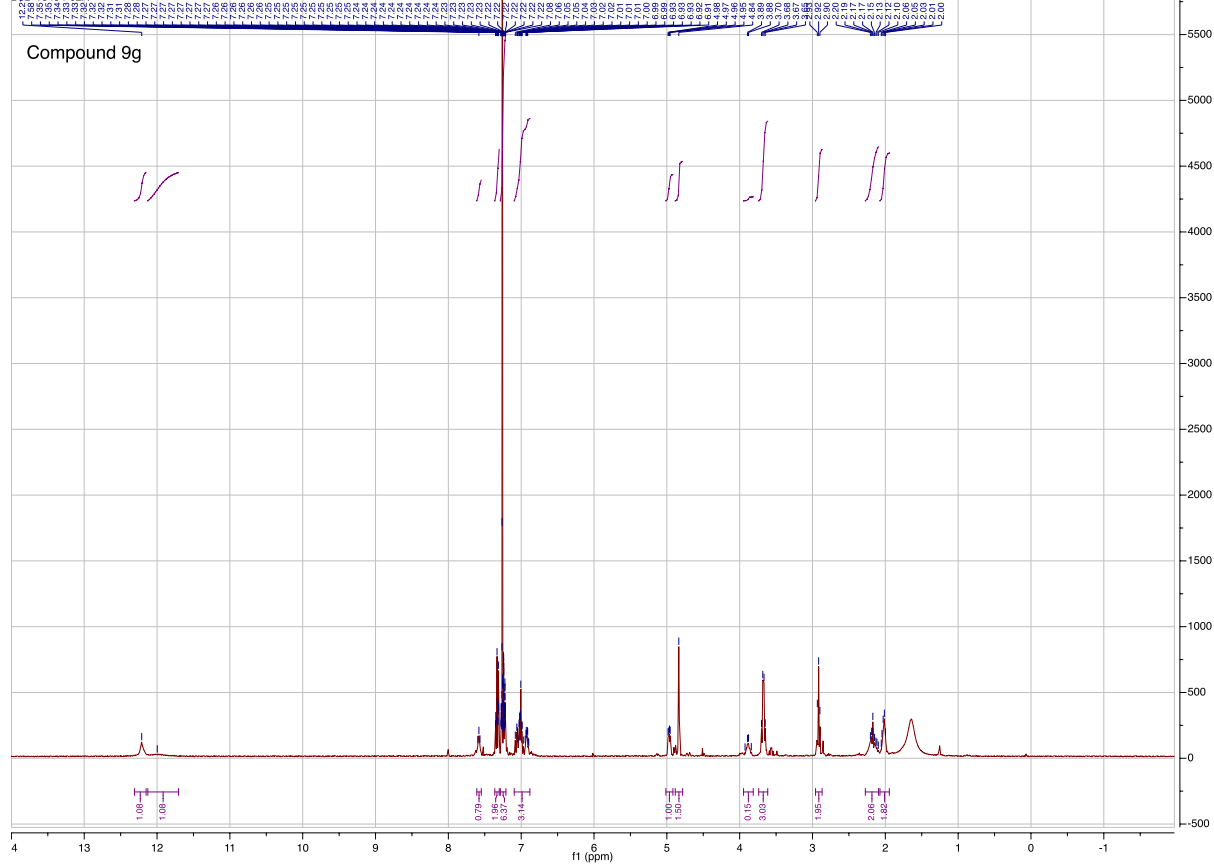

DJ8-16494-02B

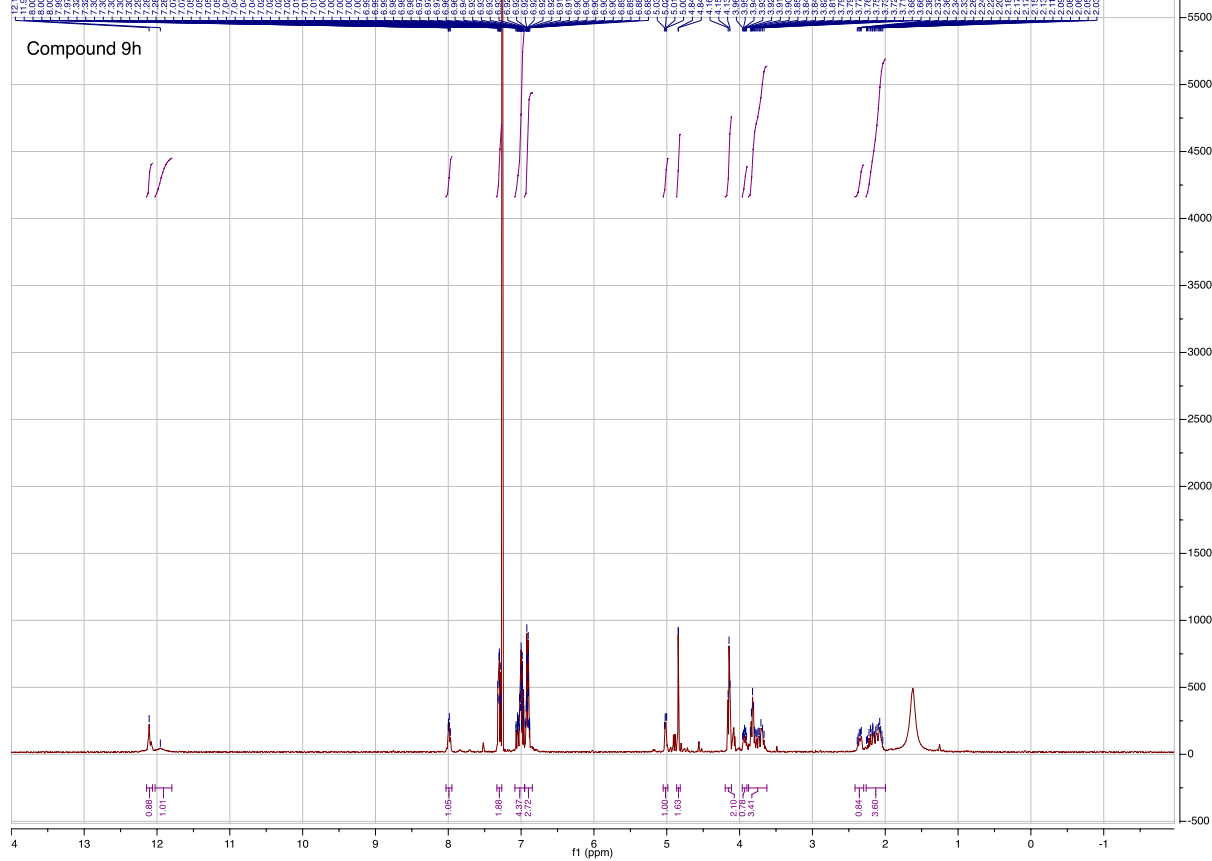

DJB-16494-23A

Compound 9i

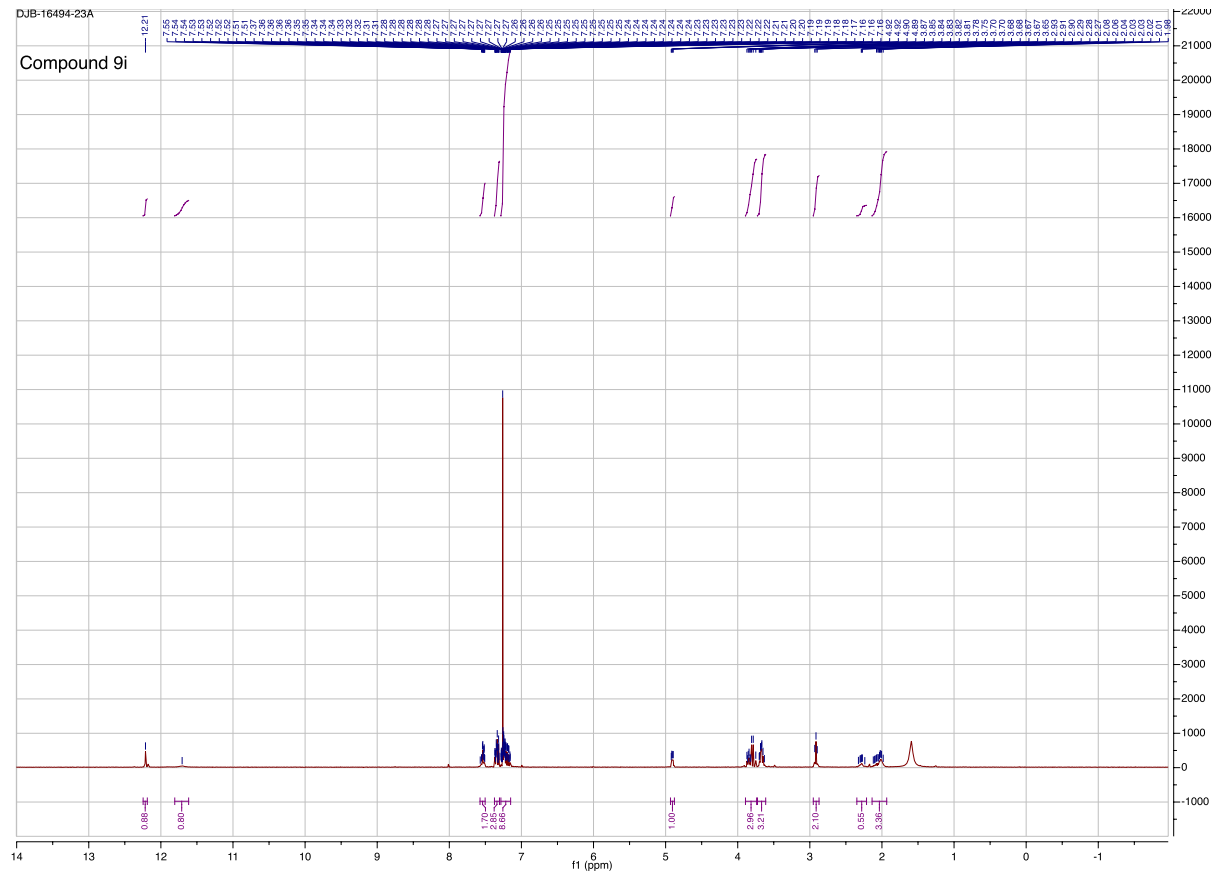

DJB-16494-51A

Compound 9j

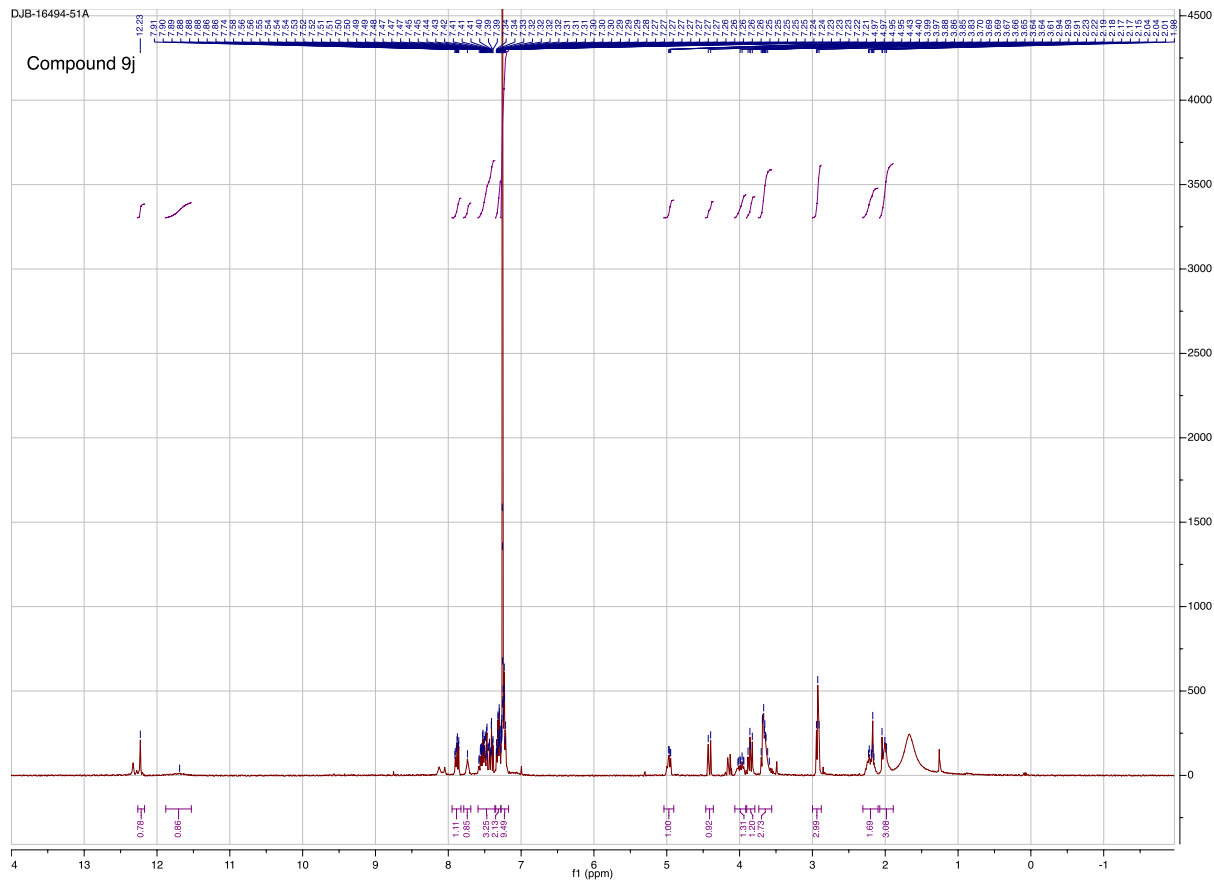



DJB-16494-23B

Compound 9k

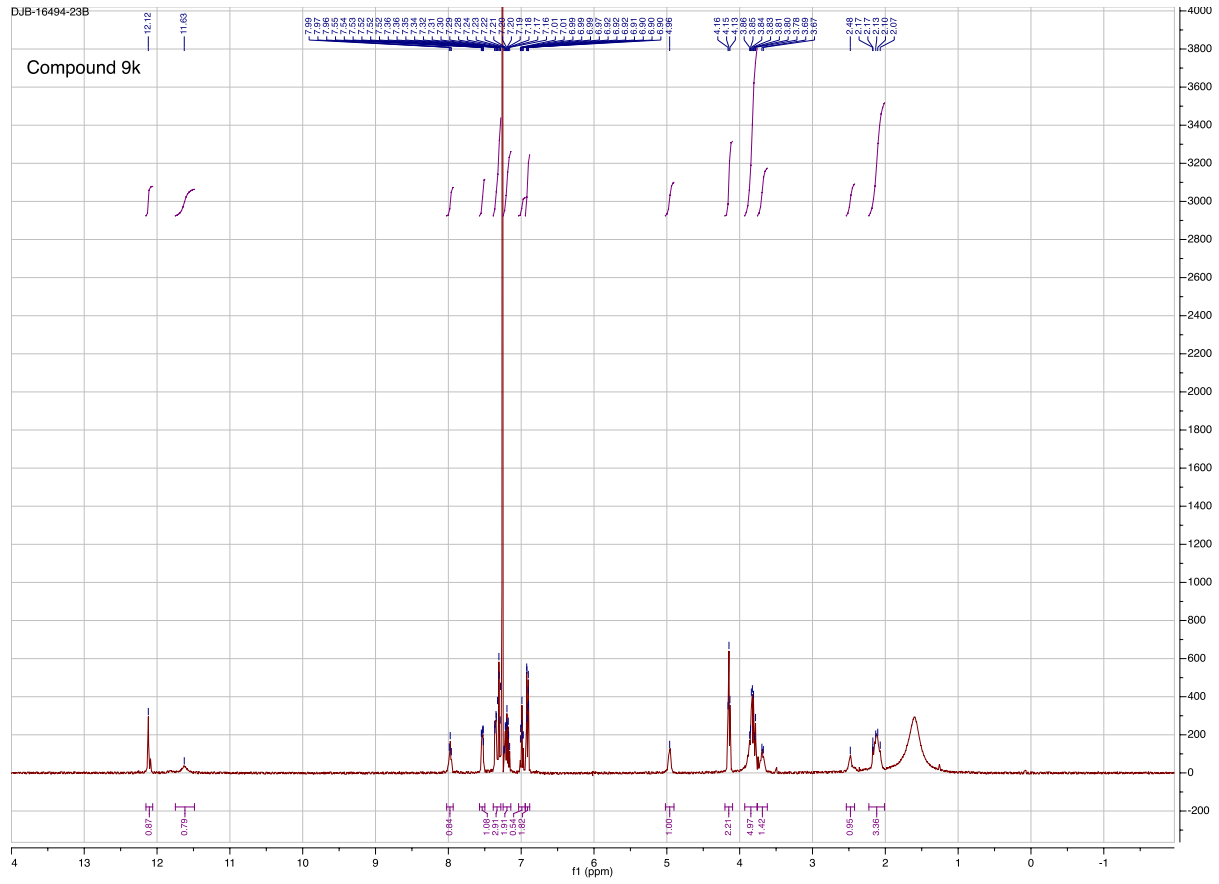



DJB-16494-37B

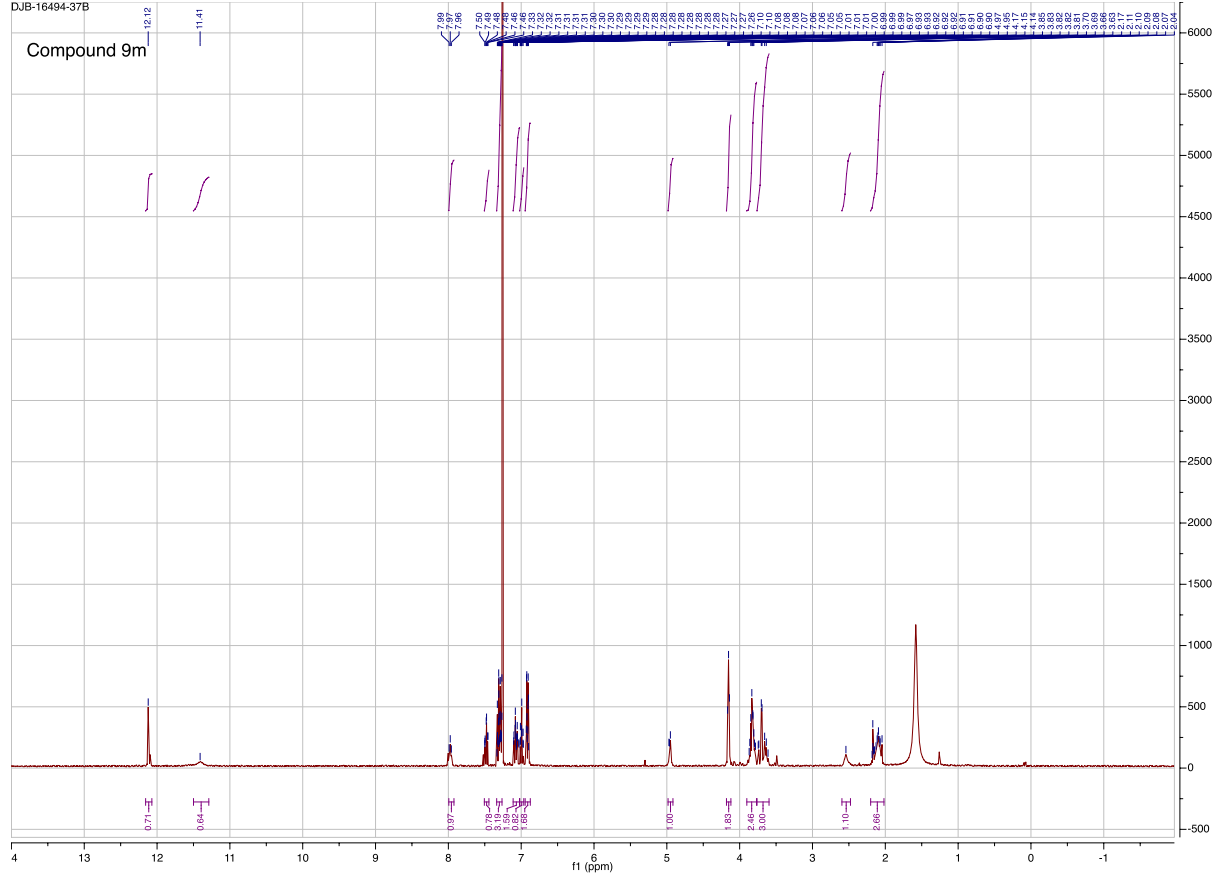

DJB-16453-33B

Compound 10a

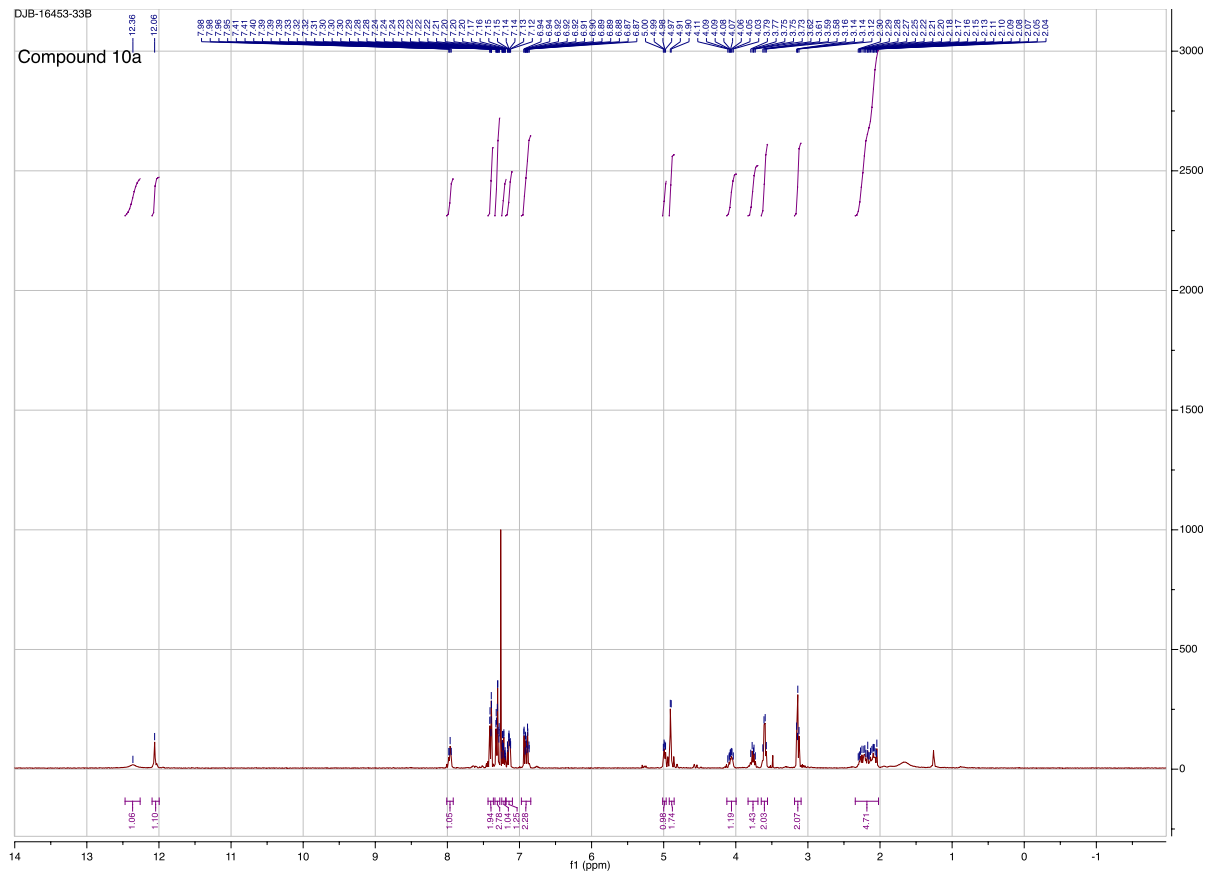



DJB-16453-74Avac2

Compound 10c

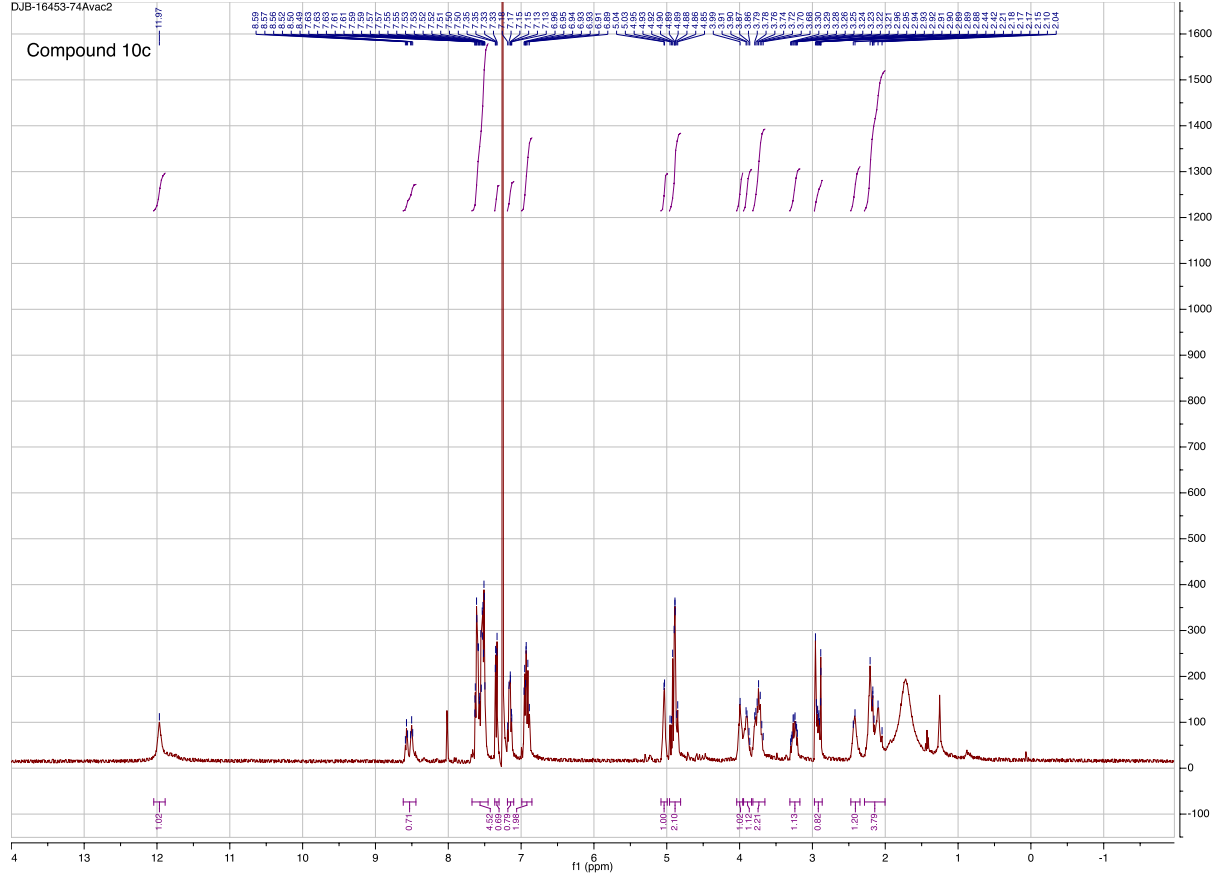



DJB-16494-23C

Compound 10e

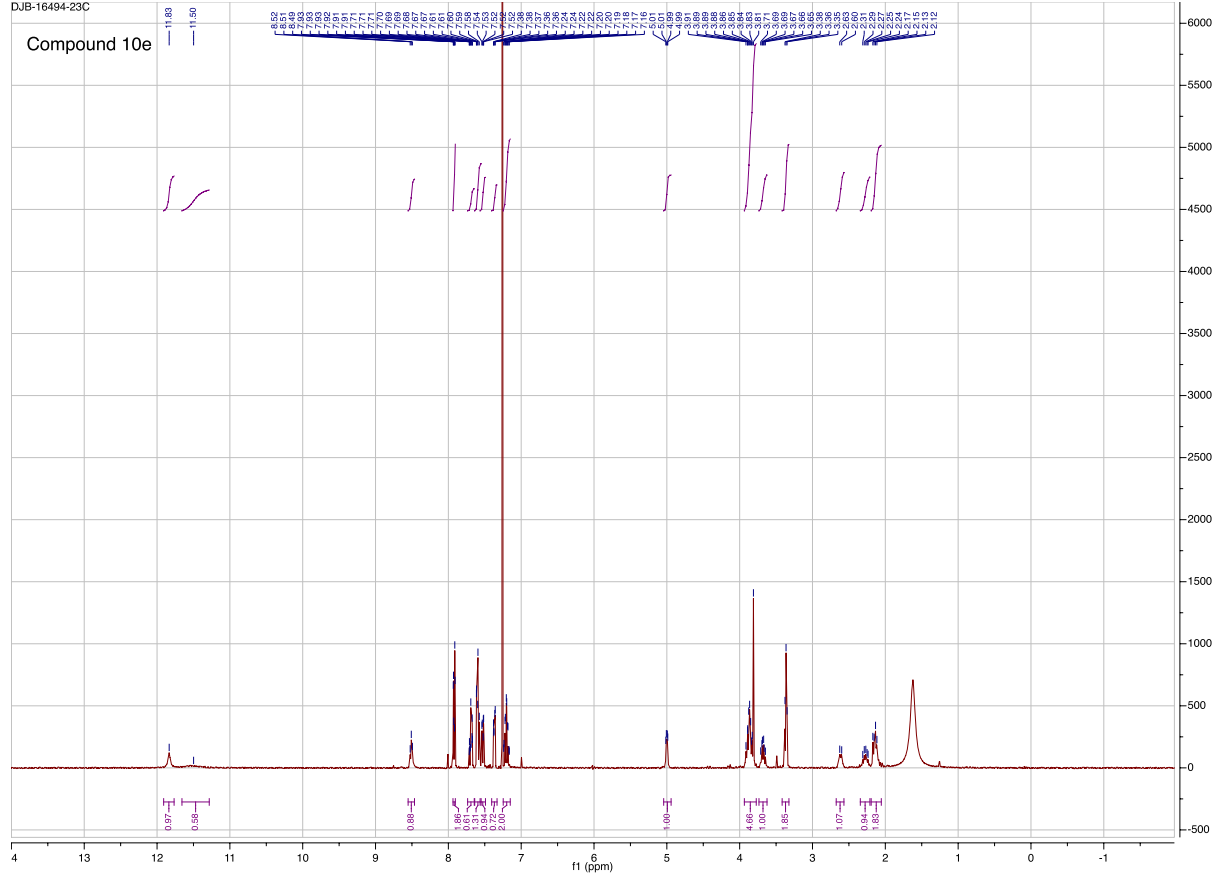



DJB-16453-53Aconc

Compound 10f

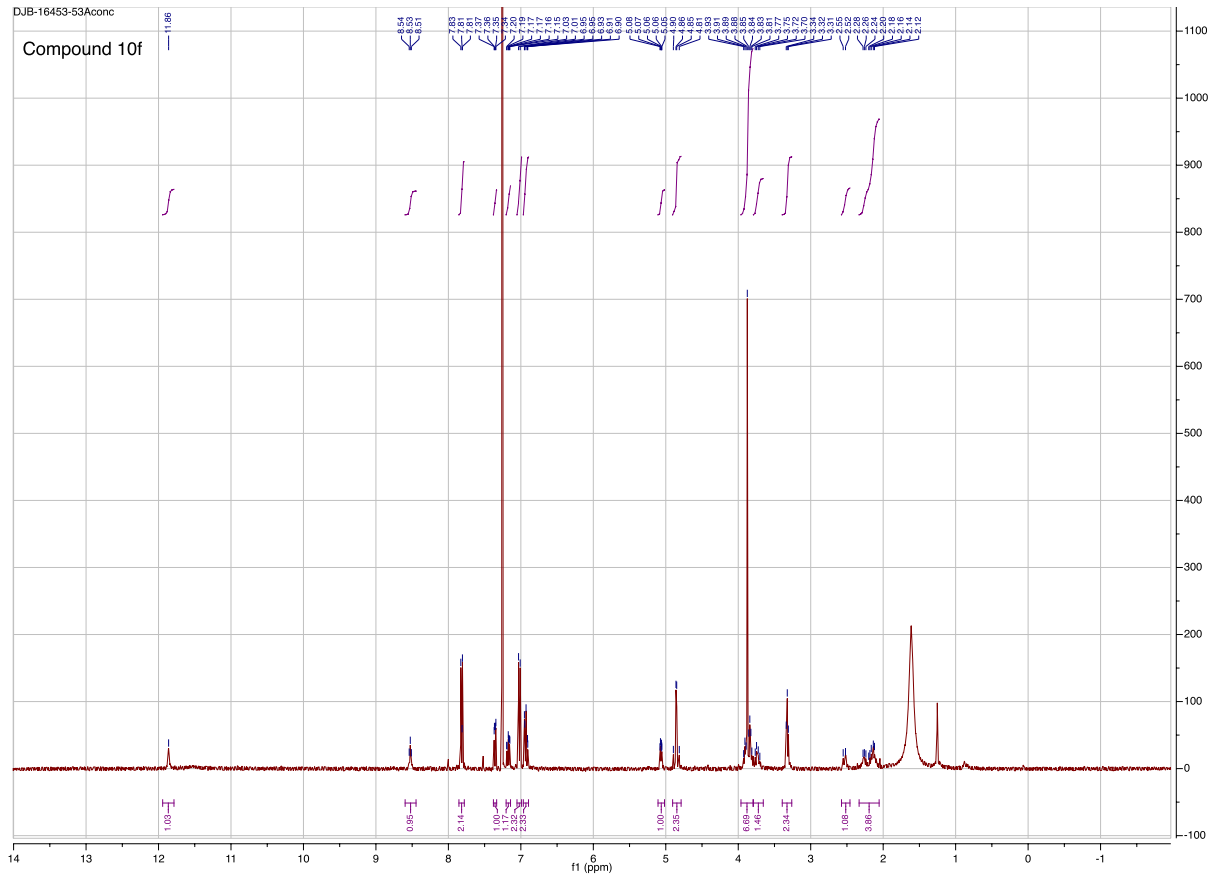

DJB-16494-40A

Compound 10g

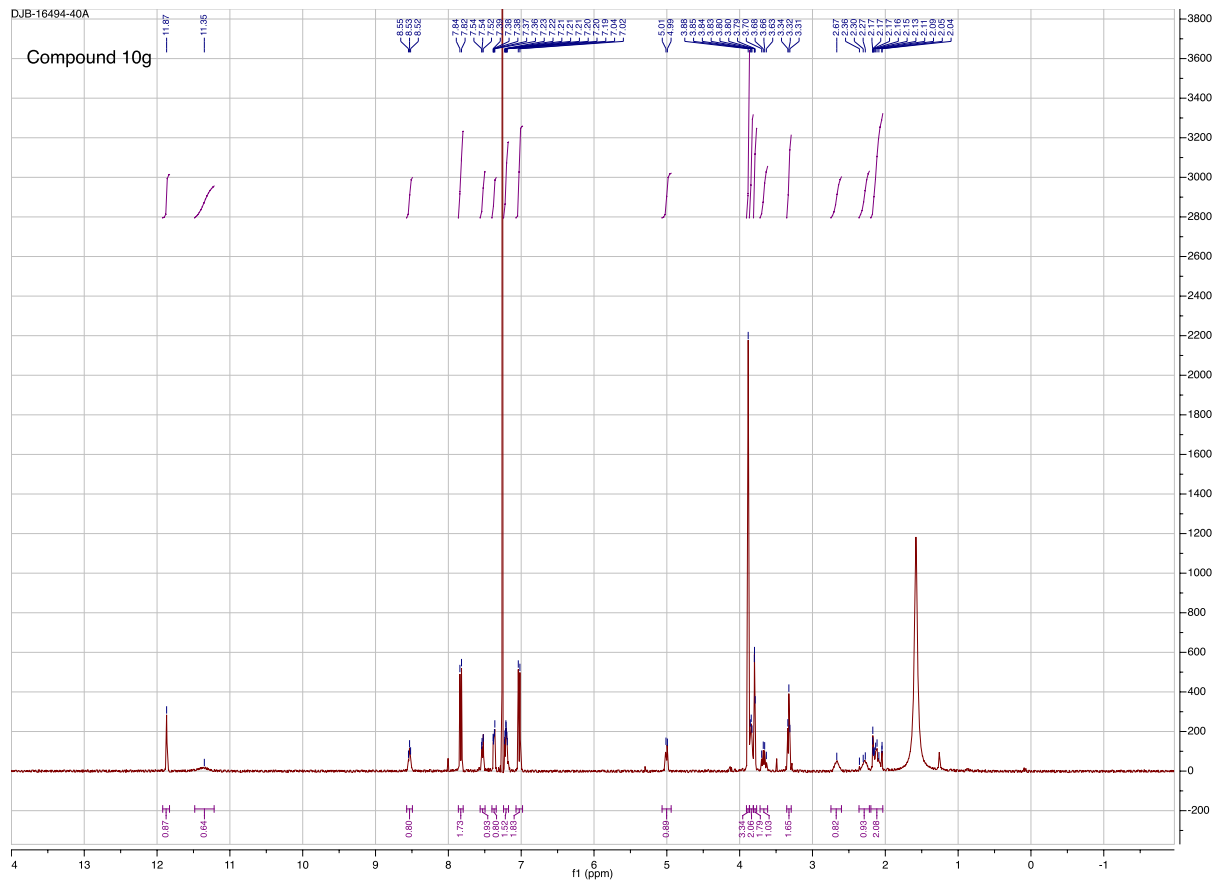

DJB-16453-28C-CDCIS

Compound 10h

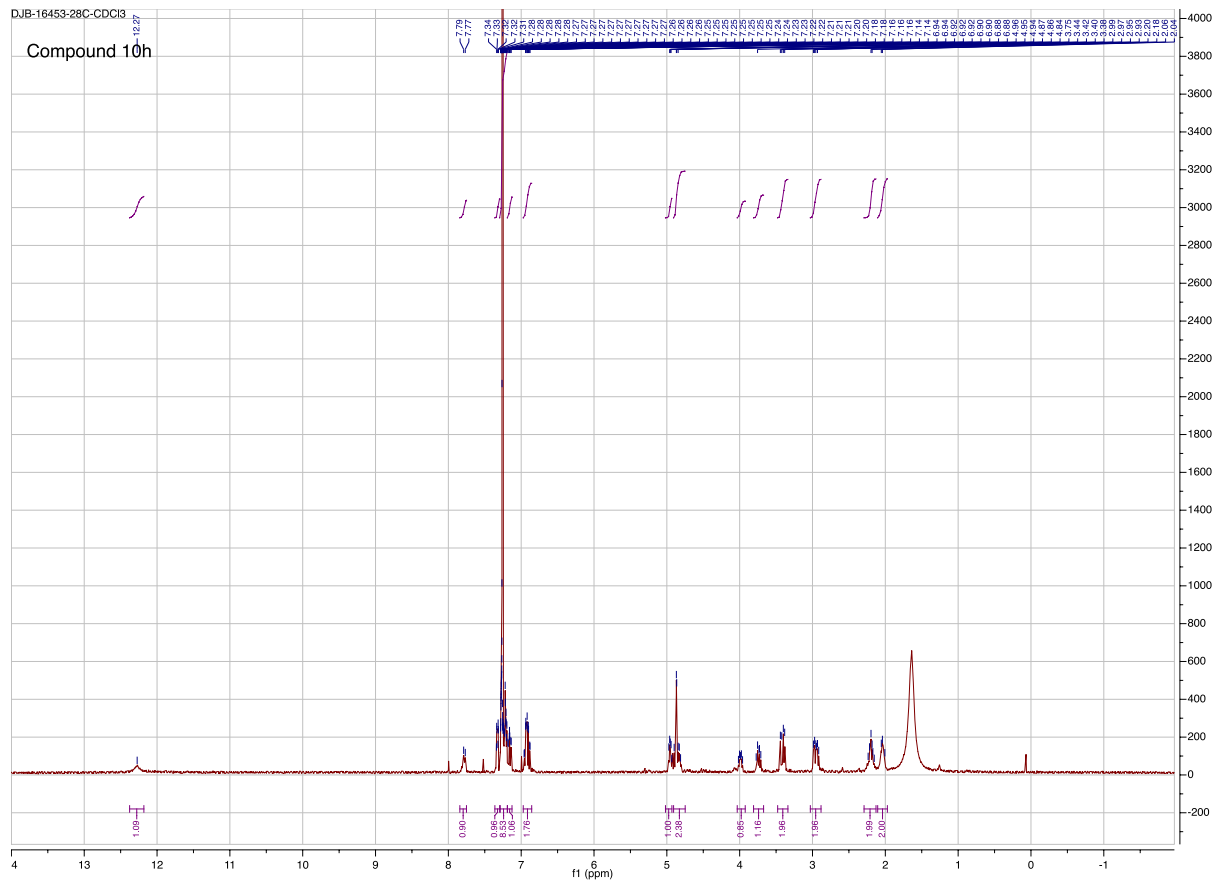



DJB-16494-29B

Compound 10j

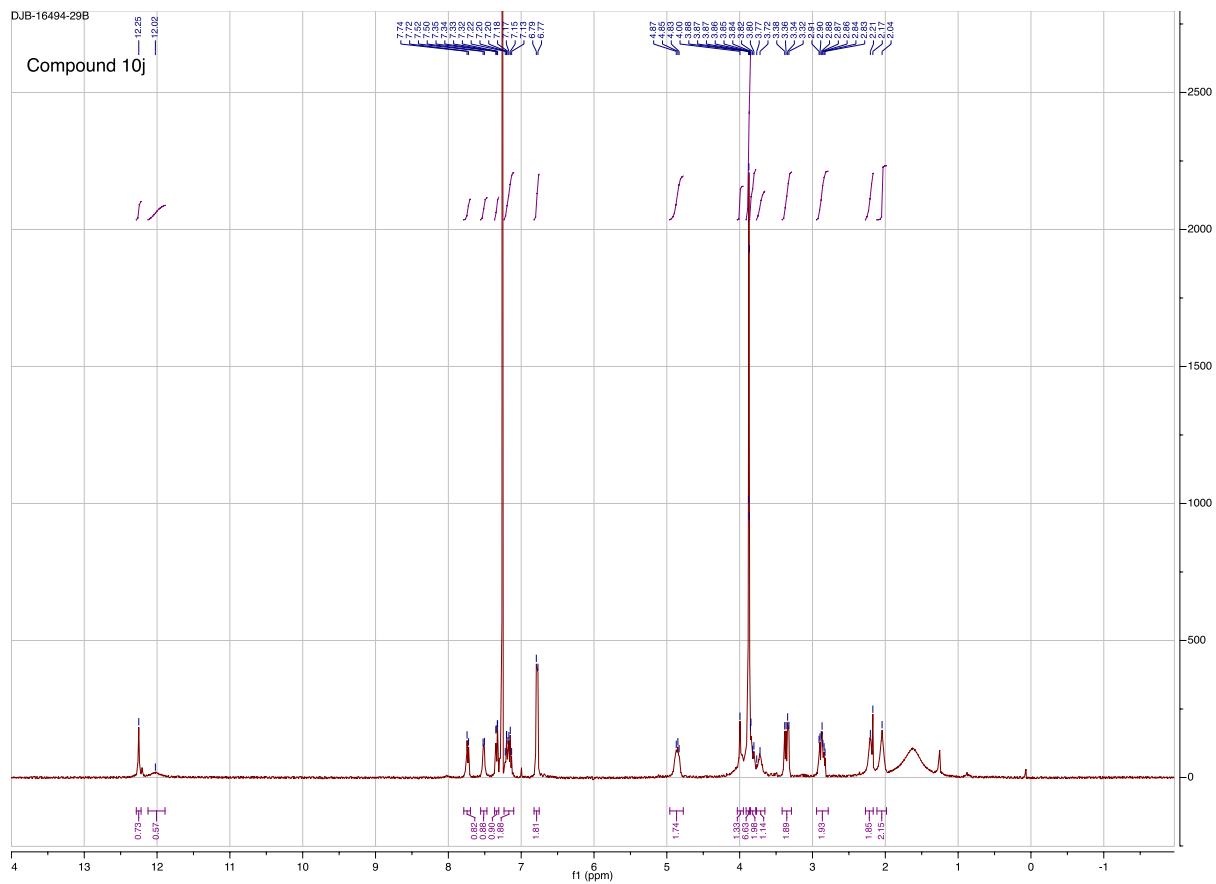

DJB-16494-31A

Compound 10k

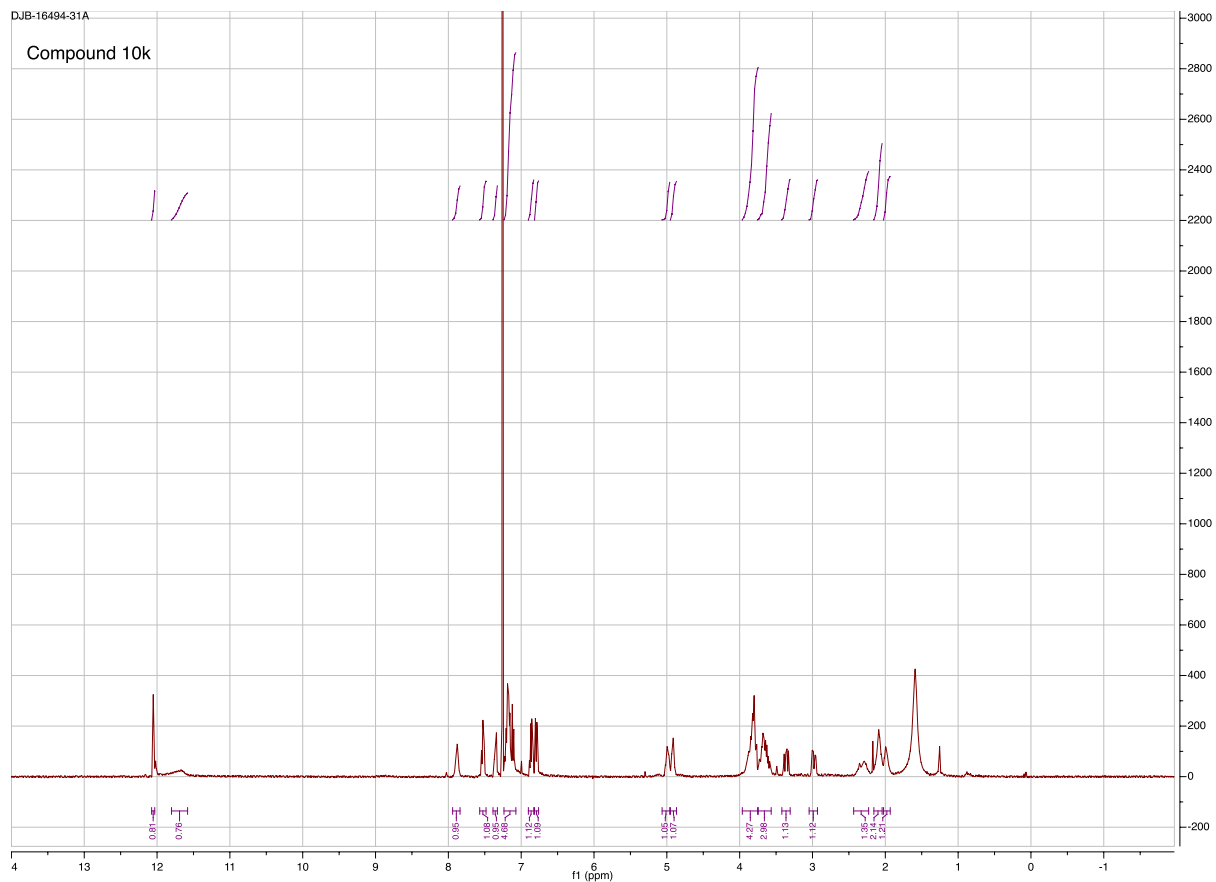

DJB-16494-31C

Compound 10I

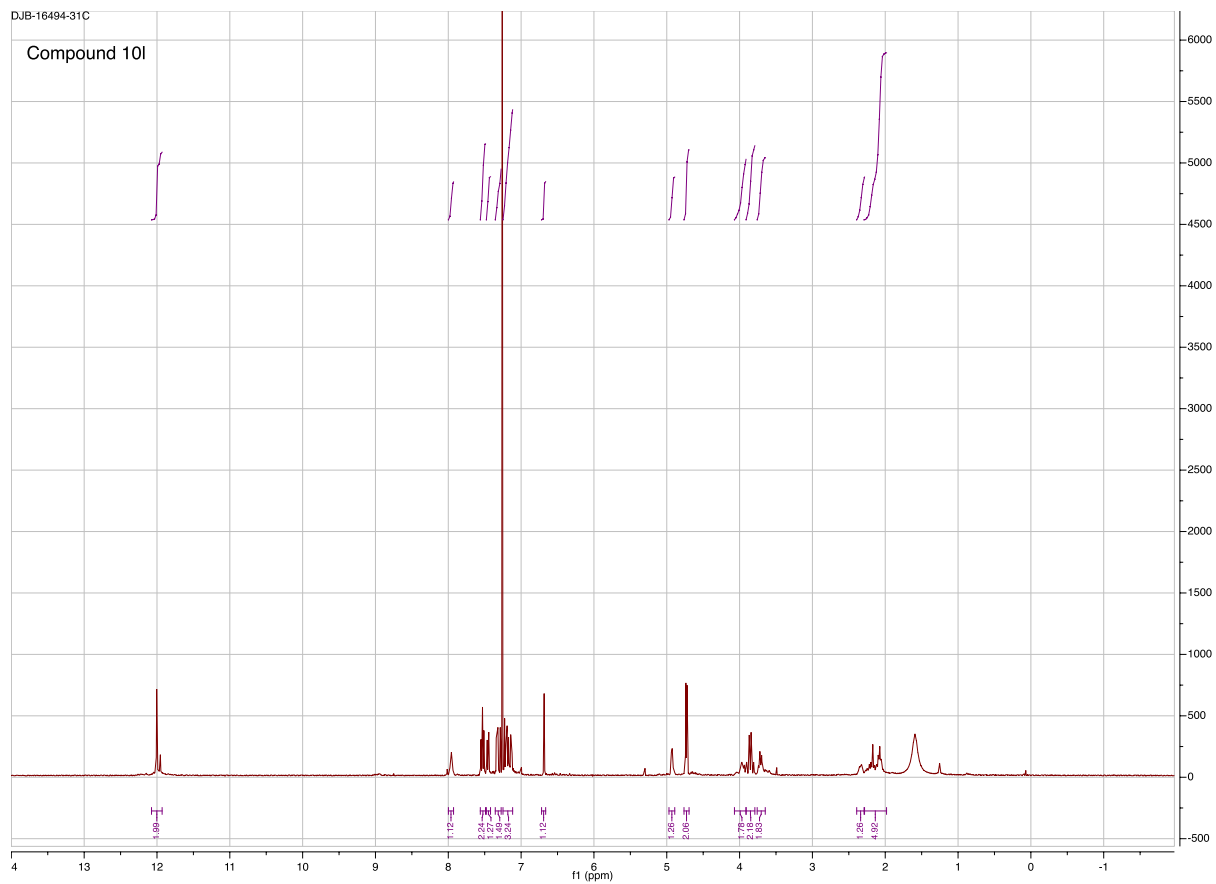





DJB-16494-18B-1

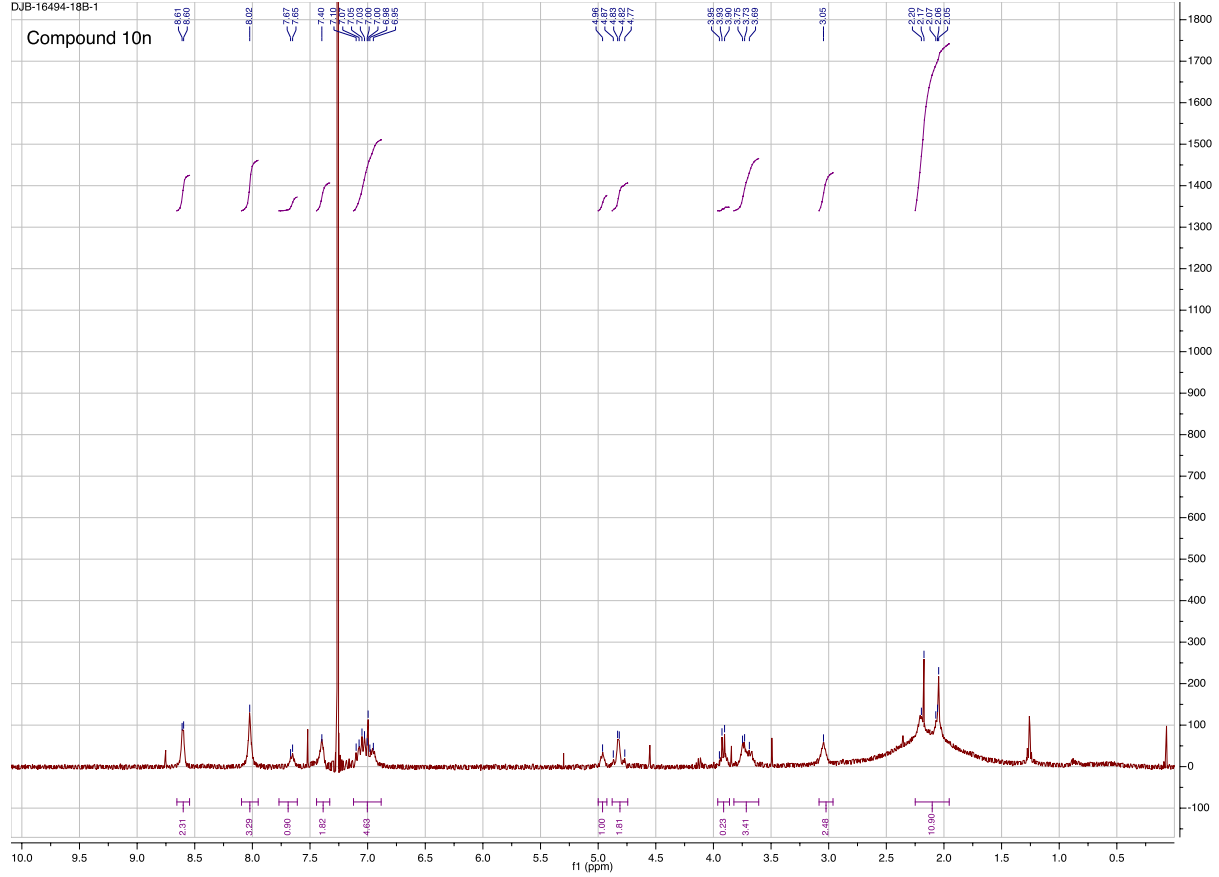

Supplement: 41598_2017_17419_MOESM1_ESM.pdf [file 41598_2017_17419_MOESM1_ESM.pdf]
